# Supplementary material for: Web-based support for self-management strategies versus usual care for people with COPD in primary healthcare: a protocol for a randomised, 12-month, parallel-group pragmatic trial
Source: PubMed Central journal article supplement (PMC6797375; doi:10.1136/bmjopen-2019-030788), 2019-10-07
Supplement: bmjopen-2019-030788.draft_revisions.pdf [file bmjopen-2019-030788.draft_revisions.pdf]

# BMJ Open

BMJ Open is committed to open peer review. As part of this commitment we make the peer review history of every article we publish publicly available.

When an article is published we post the peer reviewers' comments and the authors' responses online. We also post the versions of the paper that were used during peer review. These are the versions that the peer review comments apply to.

The versions of the paper that follow are the versions that were submitted during the peer review process. They are not the versions of record or the final published versions. They should not be cited or distributed as the published version of this manuscript.

BMJ Open is an open access journal and the full, final, typeset and author-corrected version of record of the manuscript is available on our site with no access controls, subscription charges or pay-per-view fees (<http://bmjopen.bmj.com>).

If you have any questions on BMJ Open's open peer review process please email [info.bmjopen@bmj.com](mailto:info.bmjopen@bmj.com)

# BMJ Open

**Web-based support for self-management strategies versus usual care for people with COPD in primary healthcare: a protocol for a randomised, 12 months, parallel-group pragmatic trial.**

|                               |                                                                                                                                                                                                                                                                                                                                                                                                                     |
|-------------------------------|---------------------------------------------------------------------------------------------------------------------------------------------------------------------------------------------------------------------------------------------------------------------------------------------------------------------------------------------------------------------------------------------------------------------|
| Journal:                      | <i>BMJ Open</i>                                                                                                                                                                                                                                                                                                                                                                                                     |
| Manuscript ID                 | bmjopen-2019-030788                                                                                                                                                                                                                                                                                                                                                                                                 |
| Article Type:                 | Protocol                                                                                                                                                                                                                                                                                                                                                                                                            |
| Date Submitted by the Author: | 01-Apr-2019                                                                                                                                                                                                                                                                                                                                                                                                         |
| Complete List of Authors:     | Stenlund, Tobias; Umea University Department of Community Medicine and Rehabilitation, Physiotherapy<br>Nyberg, André; Umea University Department of Community Medicine and Rehabilitation, Physiotherapy<br>Lundell, Sara; Umea University Department of Community Medicine and Rehabilitation, Physiotherapy<br>Wadell, Karin; Umea University Department of Community Medicine and Rehabilitation, Physiotherapy |
| Keywords:                     | Pulmonary Disease, Chronic obstructive, eHealth, self-management strategies, PRIMARY CARE                                                                                                                                                                                                                                                                                                                           |
|                               |                                                                                                                                                                                                                                                                                                                                                                                                                     |

SCHOLARONE™  
Manuscripts

1  
2  
3  
4  
5 Web-based support for self-management strategies versus  
6  
7 usual care for people with COPD in primary healthcare: a  
8  
9 protocol for a randomised, 12 months, parallel-group pragmatic  
10  
11 trial.  
12  
13  
14

15  
16  
17  
18  
19  
20  
21  
22  
23  
24  
25  
26  
27  
28  
29  
30  
31  
32  
33  
34  
35  
36  
37  
38  
39  
40  
41  
42  
43  
44  
45  
46  
47  
48  
49  
50  
51  
52  
53  
54  
55  
56  
57  
58  
59  
60

## AUTHORS

Tobias Stenlund, PhD, Dept. of Community Medicine and Rehabilitation, Physiotherapy, Umeå University, Umeå, 90187 Sweden. Tel.: +46907868040. E-mail: [tobias.stenlund@umu.se](mailto:tobias.stenlund@umu.se)

André Nyberg, Associate Professor, Dept. of Community Medicine and Rehabilitation, Physiotherapy, Umeå University, Umeå, 90187 Sweden. E-mail: [andre.nyberg@umu.se](mailto:andre.nyberg@umu.se)

Sara Lundell, PhD, Dept. of Community Medicine and Rehabilitation, Physiotherapy, Umeå University, Umeå, 90187 Sweden. E-mail: [sara.lundell@umu.se](mailto:sara.lundell@umu.se)

Karin Wadell, Professor, Dept. of Community Medicine and Rehabilitation, Physiotherapy, Umeå University, Umeå, 90187 Sweden. E-mail: [karin.wadell@umu.se](mailto:karin.wadell@umu.se)

Corresponding author: PhD Tobias Stenlund Dept. of Community Medicine and Rehabilitation, Physiotherapy, Umeå University, Umeå, 90187 Sweden. Tel.: +46907868040. E-mail: [tobias.stenlund@umu.se](mailto:tobias.stenlund@umu.se)

Keywords: Pulmonary Disease, Chronic obstructive; eHealth; primary care; self-management strategies

Word Count: 3900

## ABSTRACT

### Introduction

The use of adequate self-management strategies for people with chronic obstructive pulmonary disease (COPD) may increase the level of physical activity (PA), improve health-related quality of life (HRQoL) and reduce healthcare use. Whether a web-based solution in addition to prompts (e-mail and SMS) could be used to promote self-management strategies to facilitate behavior change in people with COPD are contradictory, and so far only a pilot study has been performed in Sweden. This clinical trial aims to generate evidence on the effect of a web-based site, the COPD Web, in a cohort of people with COPD in a primary healthcare context.

### Methods and analysis

The overall design is a pragmatic randomised controlled trial with pre- and post-assessments (3 and 12 months) and with a user experience evaluation. People with a diagnosis of COPD, treated in primary healthcare will be eligible for the study. A total of 144 participants will be enrolled by healthcare professionals at included primary healthcare centers and, after fulfilled baseline registration, randomised to either control or intervention group. All participants will receive usual care, a pedometer and a leaflet about the importance of PA. Participants in the intervention group will, also, get access to the COPD Web, an interactive self-managed web site that aims to support people with COPD in self-management skills. Participants in the intervention group will also continuously be supported by prompts that aim to encourage behavior changes.

The effect of participants' PA, dyspnea, COPD related symptoms, HRQoL, and health economics about healthcare use will be assessed using accelerometer and questionnaires. To identify enablers and barriers for the use of a web-based solution like the COPD Web to change behavior, semistructured interviews will be conducted in a subgroup of participants at the three months follow up.

### Ethics and dissemination

Ethical approval has been received from the Regional Ethical Review Board in Umeå, Sweden. Dnr 2018-274-31. Findings will be presented at conferences, submitted for publication in peer-reviewed journals and presented to the involved healthcare professionals, participants and patient organisations.

### Trial registration number

ClinicalTrials.gov: NCT03746873

## Article Summary

### Strengths and limitations of this study

- The use of the COPD Web will be automatically collected and analysed throughout the full intervention period, which will increase the understanding of the link between use of the COPD Web and the possible effects.
- Physical activity level will be objectively measured and bring knowledge about both short-term and long-term effects of using the COPD Web.
- The pragmatic design with generous inclusion criteria and many recruiting primary healthcare centres could enhance recruitment rates.
- Prompts will be sent continuously as a reminder and strategy to encourage greater exposures to the COPD Web.
- One limitation is that the sample size is large enough for analysing the effect on physical activity level but may not be large enough for all secondary outcomes.

## Introduction

### Background and rationale

Chronic obstructive pulmonary disease (COPD) is a chronic and disabling disease with substantial morbidity and mortality. The disease has a steady increase in prevalence and is now the third leading cause of death worldwide.<sup>1</sup> The high prevalence places a considerable burden on the healthcare system with a total yearly cost of COPD in Sweden estimated to 13.9 billion SEK<sup>2</sup> and the mean annual total costs for each person with COPD is 67% higher compared to a person without COPD.<sup>3</sup>

The symptom burden of the disease; respiratory symptoms as progressive dyspnea, fatigue, impaired physical performance, decreased level of physical activity (PA) and health-related quality of life (HRQoL) in people with COPD<sup>4</sup> is not only a consequence of the underlying condition, but depend also on the individuals' adaptation to the illness and their ability to manage their disease.<sup>5 6</sup>

Self-management strategies, including strategies to promote self-efficacy by increasing the individual's knowledge and skills and their confidence in successfully managing their disease, is therefore now an essential part of COPD management.<sup>5</sup>

This have shown to reduce breathlessness and impact of COPD in daily life, increase physical performance, level of PA, HRQoL, adherence to medication, as well as improve time to recovery after acute exacerbations and reduce overall health-related costs.<sup>5 7 8</sup> An increased level of PA is of utmost importance since PA has been shown to be decreased in all stages of the disease and degree of PA is considered the strongest predictor of all-cause mortality in people with COPD.<sup>9 10</sup>

Despite that treatment guidelines and literature strongly supports that non-pharmacological treatment (i.e., education, self-management strategies, exercise training)<sup>11</sup> should be provided, a vast majority of people with COPD are still excluded from these activities.<sup>12 13</sup> Web-based solutions are promising means of delivering health service, and may increase level of PA<sup>14</sup> as well as reduced use of health services.<sup>15</sup> However, studies evaluating whether a web-based solution as the COPD Web could be used to promote self-management strategies to support increased PA in people with COPD are contradictory.<sup>16-18</sup> The COPD Web is a web-based site, developed by our research group in co-creation with people with COPD, their relatives, healthcare professionals in primary healthcare (PHC) and researchers.<sup>19</sup> In a pilot study on 83 people with COPD<sup>20 21</sup> promising results with the increased self-reported level of PA were shown. To know whether this is true also for a larger COPD population an adequately powered randomised controlled trial is needed.

## Objectives

The main aim is to generate evidence on the effect of the COPD Web in a cohort of people with COPD, currently enrolled for usual care within the PHC context in Sweden. This is of importance, as the vast majority of people with COPD are treated within PHC.<sup>11 13</sup> The specific aims are to evaluate the effect of the use of the COPD Web in an adequately powered group of people with COPD in PHC context, regarding i) level of PA; ii) dyspnea iii) HRQoL, iv) COPD related symptoms, v) health economics in relation to healthcare use; and vi) to identify enablers and barriers for the use of an eHealth solution like the COPD Web in order to change behavior.

We hypothesise that access and use of COPD Web, in comparison to usual care, will:

- i) increase level of objectively measured PA in people with COPD,
- ii) decrease dyspnea,
- iii) increase disease-specific HRQoL,
- iv) decrease number of and/or severity of COPD-related symptoms, and
- v) decrease number of COPD-related healthcare contacts in PHC.

## Methods and analysis

### Trial design

The design is a pragmatic randomised controlled trial with pre- and post-assessments (3 months and 12 months) and with a user experience evaluation. The user experience evaluation is a necessary complement that will be performed to understand more about enablers and barriers for behavior change using web-based solutions like the COPD Web. The study is designed as a pragmatic trial<sup>22</sup> meaning that healthcare professionals, primarily COPD nurses, are involved in recruiting participants, the access to the intervention (COPD Web) is given by the researchers, but the intervention itself only uses self-instructional material and prompts (SMS and email). This design aims to minimise the effort from healthcare professionals and increase the possibility of self-management for people with COPD to improve the applicability of the findings to other healthcare settings. The protocol complies with the SPIRIT (Standard Protocol Items: Recommendations for Interventional Trials) recommendations for protocol reporting<sup>23 24</sup> checklist (Additional file 1) and the study will be reported according to CONSORT (Consolidated Standards of Reporting Trials) guidelines for pragmatic trials<sup>22</sup> and eHealth.<sup>25</sup>

### Patient and Public Involvement (PPI)

We did not directly include PPI in this study, but our research group in co-creation with PPI developed the COPD Web used in the study.

## Participants and intervention

### Study settings

Primary healthcare centers (PHCCs) from different County Councils in Sweden, will constitute the study sites. The number of PHCCs are not limited; consequently, more PHCCs may be included during the study. At present 23 PHCCs are included, 11 centers situated in urban areas and 12 centers located in smaller cities or rural areas. The number of enrolled citizens at the included PHCCs range between 5,700 and 20,300 citizens. One of the included PHCC has no enrolled citizens but act as a rehabilitation unit that treats patients with a referral from other PHCCs. Following the majority of all healthcare services in Sweden, most of the included PHCCs are publicly funded, although private alternatives with an agreement with the County Council are also included.

### Eligibility criteria

The trial will be conducted from 15 November 2018 until 144 participants are included. All people with a diagnosis of COPD (ICD-10:J44:9) who visit involved PHCCs due to their COPD will be eligible for inclusion in the study if they 1) can read and understand Swedish, 2) have a smartphone, tablet or computer with access to internet, 3) don't have dementia or other psychiatric condition that can prevent understanding of the intervention, 4) don't have severe comorbidity that can be considered as the contributing factor for limitation in PA, and 5) don't already use the COPD Web. In the case of exacerbation, the participant has to wait six weeks from the start of pharmacological treatment, before being eligible in the study.

### Participant timeline

The recruitment begins at included PHCCs. To facilitate the recruitment of participants, the number of included PHCCs will not be restricted to nor the PHCCs size, location, how they are funded or the type of care and rehabilitation that the center offers. However, written consent from the operational manager at each PHCC has to be fulfilled before recruitment can start.

To increase the possibility of recruiting participants, the number of exclusion criteria are kept to a minimum. The recruitment will take place during the participant's regular visits at the PHCC where healthcare professionals will give information about the study. People with COPD interested in participation will have their contact information and results from latest pulmonary function test (not older than six months otherwise a new function test will be taken) sent to the research group as displayed in table 1 ( $t^{-1}$ ). A researcher (TS) will after verbal agreement send questionnaires, informed consent form and activity monitor for baseline registration to the participants' homes ( $t^0$ ). When the written informed consent and the baseline registration is fulfilled, the participants' are included and randomised to either the control or intervention group ( $t^1$ ). Follow-up measurements with



1  
2  
3 questionnaires and activity monitor will be conducted at three months ( $t^2$ ) and 12 months ( $t^4$ ) after  
4 inclusion. A semi-structured interview will be done after the three months follow up ( $t^3$ ) among a  
5 convenient sample in the intervention group.  
6

7  
8 The participants will be contacted by phone before every assessment ( $t^0$ ,  $t^2$ ,  $t^4$ ) to ensure a suitable  
9 date for the activity monitoring. In case of non-response after any evaluation ( $t^0$ ,  $t^2$ ,  $t^4$ ) the  
10 participant will be reminded by phone or/and email after two weeks and again after four weeks.  
11  
12 These precautions will be made to maintain the participant in the study and increase the number of  
13 complete follow-ups.  
14  
15

## 16 17 **Intervention**

18  
19 The COPD Web consists of several sections of which one is targeting people with COPD, shown in  
20 figure 1. The section targeting people with COPD aims to support self-management and includes, in  
21 addition to texts, pictures, and films also interactive components, e.g. registration of PA with person-  
22 tailored, automatised feedback. Automatised feedback in combination with step counting has been  
23 found useful to increase PA in people with COPD.<sup>26</sup> On the COPD Web people with COPD can gain  
24 know-how about, e.g. PA, physical training, breathing techniques, exacerbation symptoms, advice on  
25 when to contact healthcare, and how to make everyday activities less strenuous. The content refers  
26 to, and aligns with the guidelines for COPD care developed and published by the National Board of  
27 Health and Welfare in Sweden.<sup>11</sup>  
28  
29  
30  
31  
32  
33

34  
35 Figure 1. A website map of the COPD Web showing the section “I have COPD”.

## 36 37 **The intervention group**

38  
39 Participants randomised to the intervention group will be introduced to the COPD web by a letter  
40 containing written information, the password to get access to the website and information on how to  
41 create an account. At the COPD Web, there will be an instruction movie available about how to use  
42 the COPD Web, to secure standardised instructions (Box 1).  
43  
44  
45

46  
47 Box 1. The content of the movie, presenting the administration of the COPD Web

- |                                                                                                                                                                                                                                                                                                                                                                                                                                                                                                                                                                                                                                                                                |
|--------------------------------------------------------------------------------------------------------------------------------------------------------------------------------------------------------------------------------------------------------------------------------------------------------------------------------------------------------------------------------------------------------------------------------------------------------------------------------------------------------------------------------------------------------------------------------------------------------------------------------------------------------------------------------|
| <p>48 1) Introduction of the website structure, the content in the main headings and functions of the<br/>49 website, e.g., how to enlarge or shrink the text, listen to the text, and bookmark information<br/>50 of particular interest.<br/>51<br/>52 2) Introduction to the section “Physical activity.” Information about the importance of PA, and<br/>53 demonstration of the page for registration of PA (steps) with automated feedback.<br/>54<br/>55 3) Information on how to set an initial weekly step goal and instructions to insert the weekly<br/>56 step-count onto the page for registration of PA at the end of each week.<br/>57<br/>58<br/>59<br/>60</p> |
|--------------------------------------------------------------------------------------------------------------------------------------------------------------------------------------------------------------------------------------------------------------------------------------------------------------------------------------------------------------------------------------------------------------------------------------------------------------------------------------------------------------------------------------------------------------------------------------------------------------------------------------------------------------------------------|

1  
2  
3  
4  
5 The COPD Web will be self-managed. To reduce user problems, one of the researchers (TS) will  
6 contact each participant in the first week of intervention. To test the participants' interest for and  
7 acceptability of the function of registering PA (steps) on the COPD Web, the participants will receive  
8 a pedometer with instructions on how it is used.  
9  
10  
11

12  
13 Prompts has shown enhanced effectiveness on limited contact interventions targeting health  
14 behaviors including PA<sup>27</sup> and proved to be useful also on people with COPD.<sup>26</sup> Throughout the  
15 intervention, participants will receive prompts via email and SMS (figure 2). The prompts will include  
16 targeted information, referral links to the COPD Web and a reminder to register counted steps to  
17 improve adherence to the intervention. There is no consensus regarding the number and frequency  
18 of prompts, but frequently delivered prompts have been recommended.<sup>28</sup> However too excessive  
19 appearance may decrease the desired response.<sup>28</sup> Consequently, the frequency of the prompts will  
20 be each week at the beginning of the intervention and decrease to biweekly (week 13 to 24) and  
21 every fourth week (week 25 to 52). In total, we will deliver 24 different prompts with predetermined  
22 content and order to each participant.  
23  
24  
25  
26  
27  
28  
29

30  
31 Figure 2. Distribution of prompts (SMS and email) to participants in the intervention group  
32  
33

### 34 **The control group**

35  
36 The control group will, similar to the intervention group, receive a pedometer with instructions, as  
37 well as a leaflet about the importance of PA in addition to usual care. In Sweden, the majority of all  
38 people with COPD are treated at their PHCC.<sup>11 13</sup> The usual care at the PHCC are recommended to  
39 include, but are not restricted to, the use of long-acting anticholinergics and long-acting  $\beta$ 2-agonists  
40 with 24 h duration and support for; smoking cessation, PA and exercise, self-management and  
41 nutrition.<sup>11</sup> All participants are permitted to start COPD rehabilitation or other interventions if  
42 offered by their PHCC.  
43  
44  
45  
46  
47  
48

### 49 **Outcomes and user experience evaluation**

50  
51 Various methods for data collection including questionnaires, accelerometer, data from medical  
52 records (participant's latest pulmonary function test), qualitative interviews, and user data from the  
53 COPD Web will be used. Table 2 provides an overview of methods for data collection in this study.  
54  
55

### 56 **Primary outcome measures**

57  
58 The primary outcome of the effect of the COPD Web is the difference in the level of PA between the  
59 intervention and control groups at the follow-ups at 3 and 12 months. The level of PA will be  
60

1  
2  
3 objectively measured seven consecutive days using an accelerometer (DynaPort®, McRoberts BV, the  
4 Netherlands) and subjectively measured with indicator questions on PA from the National Board of  
5 Health and Welfare in Sweden.<sup>29 30</sup> Weekends and weekdays with less than eight hours of wearing  
6 time of the accelerometer and measurements with less than four valid days of measurements will be  
7 excluded.<sup>31</sup>The DynaPort accelerometer has been found valid and reliable when used in people with  
8 COPD.<sup>31 32</sup>

### 13 14 **Secondary outcome measures**

15 The secondary outcomes of the effect of the COPD Web are the differences between the  
16 intervention and control groups at the follow-ups at 3 and 12 months regarding participants'  
17 dyspnea; modified Medical Research Council dyspnea scale (mMRC)<sup>33</sup>, HRQoL; Chronic Respiratory  
18 Questionnaire, self-administered (CRQ-SA)<sup>34</sup>, and COPD-related symptoms; COPD Assessment Test  
19 (CAT).<sup>35</sup>

20 Evaluation of health economics will be done using EQ-5D<sup>36</sup> to estimate quality-adjusted life (QALY)  
21 gained, commonly used in economic evaluation.<sup>37</sup>, In addition, the number of participant self-  
22 reported COPD-related healthcare contacts where a reduction in health consumption indicates a  
23 reduced economic burden.

24 The secondary outcomes were chosen as they cover specific aspects of the content of the COPD Web  
25 and most of them have previously been used in COPD and in a Swedish context. The range of  
26 outcomes will ensure assessment of relevant aspects of participants' symptoms and HRQoL.

### 31 32 **Experience evaluation**

33 For the user experience evaluation, data will be collected after three months using semi-structured  
34 individual interviews in a subgroup of participants randomised to intervention. The participants will  
35 be asked to take part in an interview at the three months follow up. The interviews will include  
36 questions regarding unexpected events or consequences of receiving the COPD Web, their use of the  
37 COPD Web, and how this use has influenced their PA behavior. Study-specific documentation and  
38 automatised data on the participants' use of the COPD Web will be collected automatically from the  
39 website, e.g., number of visits when in time they visit the site, which part of the website was used  
40 and time spent on the site.

Table 2 Methods for data collection

**Physical objectively measured physical activity (PA) level**

- Accelerometer (DynaPort, McRoberts BV (DynaPort, McRoberts BV, The Netherlands) placed on the lower back 24 hours a day over seven consecutive days.<sup>31 32</sup>
  - The quantity of PA will be assessed using the mean number of steps per day and the number of days per week that the participant could be considered physically active. Physically active is operationally defined as  $\geq 5000$  steps per day.
  - The Dynaport accelerometer has been found valid and reliable when used in people with COPD.<sup>31 32</sup>

**Physical subjectively assessed PA level**

- Questionnaire from the National Board of Health and Welfare.<sup>29</sup>
  - The time spent in physical activities such as taking a walk or working in the garden during last week is rated by choosing between pre-specified options (no time at all/30–60 min/60–90 min/9–120 min/>120 min).
  - The time spent in physical exercises such as running or doing exercise to keep fit during last week is rated by choosing between pre-specified options (no time at all/30–60 min/60–90 min/9–120 min/>120 min).
  - The categorical mode of the scale has shown low-to-moderate associations with objectively measured PA level, maximal oxygen uptake, physical performance, balance, cardiovascular biomarkers and self-rated health.<sup>29</sup>

**Health-related quality of life (HRQoL)**

- CRQ-SA The Swedish version of the self-administrated Chronic Respiratory Questionnaire.<sup>34</sup>
  - CRQ-SA aims to measure HRQoL in people with chronic respiratory distress. The questionnaire consists of 20 questions divided into four areas (dyspnea, fatigue, emotional function, and control) that are rated on a 7-graded Likert scale. The questions include, for example, "How often in the last two weeks have you known that you had complete control over your breathing problems?" and "In the last two weeks, how often have you known that you had low energy?".<sup>34</sup>
  - CRQ-SA has shown strong responsiveness to changes in HRQoL for people with COPD.<sup>38</sup>

**COPD-related symptoms**

- The questionnaire COPD Assessment Test (CAT).<sup>35</sup>
  - The severity of eight COPD-related symptoms (coughing, the presence of phlegm, feeling of tightness in the chest, breathlessness when walking, limitation in activities, confidence in leaving home, sleep, and energy) is rated on a six-grade scale.
  - Evaluated for internal consistency, stability over time in stable patients and ability to discriminate between stable and exacerbation patients with excellent or very good results.<sup>35</sup>

**Dyspnea**

- The questionnaire modified Medical Research Council Dyspnea Scale (mMRC).<sup>33</sup>
  - Perceived dyspnea is rated on a 5-graded Likert scale ranging from 0 ("I just get out of breath when I exert myself greatly" to 4 ("I get out of breath when I wash or get dressed").
  - Evaluated for categorising people with COPD in terms of disability with good results.<sup>39</sup>

**Health economics**

- Self-reported healthcare contacts related to COPD
- The questionnaire EuroQol five dimensions questionnaire(EQ-5D).<sup>36</sup>
  - Health status is rated on five items; three items relate to problems in mobility, self-care, and usual activities and two items cover the presence and severity of pain and anxiety/depression. Each item is rated on a three-grade scale corresponding to no problem/some or moderate problems/extreme problems.

- Health state is rated on a scale ranging from 0 (worst imaginable health state) to 100 (best possible health state).
- Evaluation of health economy will be done using EQ-5D to estimate quality-adjusted life (QALY) gained.<sup>37</sup> Also, the number of COPD-related health contacts and hospitalisation that occurs during the intervention will be followed and cost estimated.
- EQ-5D can discriminate between groups of people with different severity of COPD.<sup>40</sup>

### Implementation

- Implementation of the COPD Web.
  - Semi-structured interviews according to a pre-specified interview guide and user statistics from the website.
- Fidelity to the intervention.
  - Semi-structured interviews according to a pre-specified interview guide.
- Reach.
  - Study-specific documentation including the number of participants who decline to take part in the intervention. When appropriate, the reasons to decline will also be noted.
- Enablers and barriers for the use of an eHealth solution like the COPD Web
  - Semi-structured interviews according to a pre-specified interview guide.

---

COPD, chronic obstructive pulmonary disease.

## Data collection, management, and analysis

### Sample size calculation

The sample size was calculated with the premises that a total of 144 participants with COPD would be required to detect a mean difference of 1131 steps with a standard deviation of 2193 steps,  $\alpha = 0.05$ ,  $\beta = 0.20$  (80% power), and a two-tailed test of significance<sup>41</sup> including an estimated dropout rate of 20%.<sup>26</sup>

Approximately 10-15 participants will be recruited to individual interviews to have various experiences represented. A wide distribution of age, disease severity and an equal number of women and men will be strived for.

### Randomisation and masking

A permuted block design with a random block size varying from 4 to 8 in a 1:1 allocation ratio will be computer generated to randomise participants. This approach is chosen to achieve balanced and evenly distributed samples. A third party, not involved in data collection or analysis of the results will perform the randomisation and the result will be stored in sealed envelopes. Thus, the randomisation will be revealed for the researcher when the baseline registration and written informed consent are fulfilled, and the sealed envelope next in order is opened. The researcher then will send a letter containing the result of group allocation, a pedometer, a pamphlet about PA and information about when the participant will be contacted again. The members of the intervention group will, in addition, receive the material and information on how to start using the COPD Web.

1  
2  
3 Due to the character of the intervention, blinding of trial participants will not be applicable.  
4 Furthermore, as all data are self-reported, neither is blinding of outcome assessors applicable.  
5  
6

### 7 **Data management and monitoring**

8  
9 To ensure confidentiality, participants with COPD will get a unique identification (ID) when included  
10 in the study. The code list linking the participants and the ID number will be kept separate from the  
11 data. Data will be analysed by ID only. All records that contain names or other personal identifiers,  
12 such as locator forms and informed consent forms, will be stored separately from study records  
13 identified by the ID number. The local database will be secured with a password-protected access  
14 system. All data will be coded and reported on a group level. Thus it will not be possible to identify  
15 specific participants in the trial. We will use two-pass verification to ensure correct data entry. No  
16 interim analyses or stopping guidelines are pre-specified. Only the researchers will have access to the  
17 final trial dataset.  
18  
19  
20  
21  
22  
23

### 24 **Statistics and qualitative analysis**

25  
26 The primary analysis will be an intention-to-treat analysis (including all participants randomised). In  
27 addition, a complete case population (participants with full outcome measurements independent on  
28 adherence to intervention), and a per-protocol analysis (defined as at least one login besides creating  
29 an account on the COPD Web or answering that the SMS and email with referral links have been used  
30 at least rarely (1-3 times) at the follow-ups) will be performed. Missing data will be imputed in the  
31 intention-to-treat analysis using multiple imputation assuming data is missing at random conditional  
32 on participant severity of disease and self-reported history of exacerbations. This is because the  
33 severity of disease and history of exacerbations are known risk factors for future exacerbations and  
34 may affect adherence to PA interventions.<sup>42</sup>  
35  
36  
37  
38  
39  
40  
41

42 Mixed models will be used for analysis of data with individuals at level 1 and the healthcare unit at  
43 level 2. Estimates of effect sizes will be computed using Cohen's d (d = difference in group  
44 means/error SD within). Calculated as the difference between predicted means from the final mixed-  
45 effects model for a given pair of groups divided by the estimated within-group error SD in the model  
46 with the estimated value of  $2\sigma_e^2$ , where  $\sigma_e^2$  is the residual variance. To judge the quality of the model  
47 we, will analyse the residuals. No sub-group or adjusted analyses other than the pre-specified  
48 complete case and per-protocol analysis will be performed.  
49  
50  
51  
52  
53

54 The individual interviews will be analysed using qualitative content analysis according to the  
55 procedures presented by Graneheim.<sup>43</sup> The interviews transcriptions will be read, coded and  
56 categorised by one researcher. Two other researchers will also read and code independently for  
57  
58  
59  
60

1  
2  
3 triangulation. Organisation and labeling of categories will be discussed and modified throughout the  
4 process.  
5

### 6 7 **Amendments**

8  
9 Any modifications to the protocol that may influence the conduct of the study, the potential benefit  
10 of the participant or may affect participant safety, including changes of study objectives, study  
11 design, population, sample sizes, study procedures or significant administrative aspects will require a  
12 formal amendment to the protocol. Such modifications will be agreed upon by the research group  
13 with the final decision by the principal investigator, and if needed to be approved by the local ethic  
14 committees.  
15  
16  
17  
18

19 Administrative changes of the protocol (e.g., minor corrections and clarifications) that do not  
20 influence how the study is conducted will be agreed upon by the research group with the final  
21 decision by the principal investigator and will be documented and presented upon publication.  
22  
23  
24

### 25 **Ethics approval and consent to participate**

26  
27 Ethical approval has been received from the Regional Ethical Review Board in Umeå, Sweden. Dnr  
28 2018-274-31. All participants will receive brief and comprehensible oral and written information, by  
29 the Helsinki Declaration.<sup>44</sup> The first informed consent that confirms that contact information and  
30 latest lung function test from the potential participant will be collected by healthcare professionals  
31 and sent to the researchers. The participant will, together with the baseline registration, send the  
32 second and final informed consent to the researcher. The informed consent from operational  
33 managers will be sent and stored at the Regional Ethical Review Board in Umeå, Sweden.  
34  
35  
36  
37  
38  
39

### 40 **Dissemination**

41 The results of this study will be submitted for publication in peer-reviewed journals and presented at  
42 conferences both nationally and internationally as well as to included healthcare professionals,  
43 participants, and patient organisations within COPD.  
44  
45  
46

### 47 **Trial registration**

48 Registration of the clinical trial before the enrolment of the first participant was performed. Date of  
49 trial initial release 2018-11-15 and published 2018-12-20. ClinicalTrials.gov identifier: NCT03746873.  
50 The recruitment began 2018-11-15 and will continue until sufficient power is reached.  
51  
52  
53  
54  
55  
56  
57  
58  
59  
60

## Discussion

This study protocol presents a pragmatic randomised controlled trial with pre- and post-assessments aimed at evaluating the effect of the use of the COPD Web in people with COPD in a PHC context.

The study also intends to identify enablers and barriers to use of an eHealth solution like the COPD Web to change behavior among people with COPD. Currently, despite its proven effectiveness, access to self-management interventions is limited<sup>2 12</sup>, and alternative ways of promoting self-management for people with COPD are warranted. A recent pilot trial has shown that giving people with COPD access to the COPD Web may be an effective short-term strategy to promote self-management that increase short-term levels of PA, promote conceptual knowledge and alter disease management strategies.<sup>21</sup> However, these results need to be confirmed in a definitive large-scale randomised trial including both short-term and long-term evaluation.

This proposed trial will provide new knowledge to this research area by evaluating the effect of the use of an eHealth tool for increasing access to self-management strategies for people with COPD and determine its effect on clinically relevant outcomes, e.g. PA, COPD-related symptoms and dyspnea. This trial will include shorter (3 months) and longer-term perspectives (12 months) with objectively measured PA in addition to the self-reported PA that will contribute with more knowledge regarding the effect of having access to the COPD Web. PA is of utmost importance, as the level of PA is one of the strongest predictors of mortality among people with COPD.<sup>9 10</sup>

A user experience evaluation of the COPD Web intervention will provide novel information and understanding about enablers and barriers for the use of a web-based solution like the COPD Web to change behavior. This information will increase knowledge of how the process of receiving the intervention can be interpreted. It will also help us draw a better conclusion about if the COPD Web is accepted by the participants and about the intervention's effectiveness.

By recommendations by the pilot study, prompts will be used to encourage the use of the COPD Web during the whole intervention.<sup>21</sup> The reminders will provide information with referral links that will come in a predefined way. Prompts has been proven effective in other setups but there is no consensus regarding the number of prompts or frequency, especially in a longer perspective.<sup>28</sup> The effect of the prompts will be qualitatively evaluated through the semi-structured interviews. The evaluation will answer how the prompts were perceived and if they induced more frequent use and/or changed behavior for PA among the participants.

The use of the COPD Web will be automatically registered through the whole intervention since the participants need to log in to access the website. That measure makes it possible to analyse and answer if there is an association between the use of the COPD Web, e.g., time and number of visits and any possible effect.



1  
2  
3 As the study is designed as a pragmatic trial<sup>22</sup>, the intervention will be self-managed and distance-  
4 based to maximise the clinical applicability of the findings. One concern though is that there might be  
5 participants that do not manage the instructions to create their account and learn how to use the  
6 website. However, they will be contacted at the beginning of the intervention to reduce user  
7 problems. The pragmatic approach also means that there is no selection on the number, size or  
8 location of the recruiting PHCCs. Also, the inclusion criteria are set wide with a minimised selection  
9 beyond diagnosed COPD that could enhance the recruitment rates and finally increase the clinical  
10 applicability of the findings within PHC.

11  
12  
13 One limitation is that the sample size, calculated on PA, will be large enough for evaluation of the PA  
14 but may not be large enough for all secondary outcomes or sub-group analyses. The latter much  
15 depending on the severity of symptoms among the participants.

16  
17  
18 In conclusion, the pragmatic randomised trial will provide clinically relevant information on the effect  
19 of the use of the COPD Web in people with COPD in a PHC context regarding level of PA, dyspnea,  
20 HRQoL, COPD-related symptoms and health economics in relation to healthcare use, as well as  
21 barriers and enablers for using web-based solutions such as the COPD Web.

### 22 23 24 25 26 27 28 29 30 31 32 33 34 **Ethics approval and consent to participate**

35  
36 Regional Ethical Review Board in Umeå, Sweden.

### 37 38 39 **Availability of data and materials**

40  
41 Not applicable.

### 42 43 44 **Consent for publication**

45  
46 Not applicable.

### 47 48 49 **Competing interests**

50  
51 AN reports lecture fees from AstraZeneca.

### 52 53 54 **Author Contributions**

55  
56 TS has made direct and substantial contribution to this work by contributing to the conception and  
57 design of the study, designing and writing of the protocol. AN has made direct and substantial  
58 contribution to this work by contributing to the conception and design of the study, sample size  
59 calculation and choice of statistics, designing and writing of the protocol. SL has made direct and  
60 substantial contribution to this work in providing critical revisions that are important for the

1  
2  
3 intellectual content of the protocol. KW is the principal investigator and has made direct and  
4 substantial contribution to this work by providing the project idea, contributing to the conception  
5 and design of the study and by providing critical revisions that are important for the intellectual  
6 content of the protocol. All authors have approved the final version of the protocol.  
7

## 8 **Acknowledgement**

9  
10 Not applicable  
11

## 12 **Funding**

13  
14 This work was supported by The Swedish Research Council, grant number 521-2013-3503 and the  
15 Strategic Research Area – Care Science, Umeå University, Sweden, no grant number available.  
16  
17

## 18 **References**

- 19  
20  
21  
22  
23 1. World Health Organization. The top 10 causes of death.:  
24 <http://www.who.int/mediacentre/factsheets/fs310/en/>; [accessed 2019-03-19].  
25  
26 2. Jansson SA, Backman H, Stenling A, et al. Health economic costs of COPD in Sweden by disease  
27 severity - Has it changed during a ten years period? *Respir Med* 2013 doi:  
28 10.1016/j.rmed.2013.07.012  
29  
30 3. Jansson SA, Backman H, Ronmark E, et al. Hospitalization Due to Co-Morbid Conditions is the Main  
31 Cost Driver Among Subjects With COPD-A Report From the Population-Based OLIN COPD  
32 Study. *Copd* 2015;12(4):381-9. doi: 10.3109/15412555.2014.974089 [published Online First:  
33 2014/11/22]  
34  
35 4. Vogelmeier CF, Criner GJ, Martinez FJ, et al. Global Strategy for the Diagnosis, Management, and  
36 Prevention of Chronic Obstructive Lung Disease 2017 Report. GOLD Executive Summary. *Am J  
37 Respir Crit Care Med* 2017;195(5):557-82. doi: 10.1164/rccm.201701-0218PP [published  
38 Online First: 2017/01/28]  
39  
40 5. Spruit MA, Singh SJ, Garvey C, et al. An official American Thoracic Society/European Respiratory  
41 Society statement: key concepts and advances in pulmonary rehabilitation. *Am J Respir Crit  
42 Care Med* 2013;188(8):e13-64. doi: 10.1164/rccm.201309-1634ST [published Online First:  
43 2013/10/17]  
44  
45 6. Effing TW, Bourbeau J, Vercoulen J, et al. Self-management programmes for COPD: moving  
46 forward. *Chronic respiratory disease* 2012;9(1):27-35. doi: 10.1177/1479972311433574  
47  
48 7. Apps LD, Mitchell KE, Harrison SL, et al. The development and pilot testing of the self-management  
49 programme of activity, coping and education for chronic obstructive pulmonary disease  
50 (SPACE for COPD). *International journal of chronic obstructive pulmonary disease* 2013;8:317-  
51 27. doi: 10.2147/COPD.S40414  
52  
53 8. Velloso M, Jardim JR. Study of energy expenditure during activities of daily living using and not  
54 using body position recommended by energy conservation techniques in patients with COPD.  
55 *Chest* 2006;130(1):126-32. doi: 10.1378/chest.130.1.126  
56  
57 9. Waschki B, Kirsten A, Holz O, et al. Physical activity is the strongest predictor of all-cause mortality  
58 in patients with COPD: a prospective cohort study. *Chest* 2011;140(2):331-42. doi:  
59 10.1378/chest.10-2521 [published Online First: 2011/01/29]  
60  
61 10. Gimeno-Santos E, Frei A, Steurer-Stey C, et al. Determinants and outcomes of physical activity in  
62 patients with COPD: a systematic review. *Thorax* 2014;69(8):731-9. doi: 10.1136/thoraxjnl-  
63 2013-204763

11. Socialstyrelsen [The National Board of Health and Welfare]. Nationella riktlinjer för vård vid astma och KOL 2018. [National guidelines for asthma and COPD care] [accessed March 13, 2019].
12. Wadell K, Janaudis Ferreira T, Arne M, et al. Hospital-based pulmonary rehabilitation in patients with COPD in Sweden-A national survey. *Respir Med* 2013;107(8):1195-200. doi: 10.1016/j.rmed.2013.04.019
13. Sundh J, Lindgren H, Hasselgren M, et al. Pulmonary rehabilitation in COPD - available resources and utilization in Swedish primary and secondary care. *International journal of chronic obstructive pulmonary disease* 2017;12:1695-704. doi: 10.2147/copd.s135111 [published Online First: 2017/06/28]
14. Lundell S, Holmner A, Rehn B, et al. Telehealthcare in COPD: A systematic review and meta-analysis on physical outcomes and dyspnea. *Respir Med* 2015;109(1):11-26. doi: 10.1016/j.rmed.2014.10.008
15. Adams SG, Smith PK, Allan PF, et al. Systematic review of the chronic care model in chronic obstructive pulmonary disease prevention and management. *Archives of internal medicine* 2007;167(6):551-61. doi: 10.1001/archinte.167.6.551
16. Farmer A, Williams V, Velardo C, et al. Self-Management Support Using a Digital Health System Compared With Usual Care for Chronic Obstructive Pulmonary Disease: Randomized Controlled Trial. *J Med Internet Res* 2017;19(5):e144. doi: 10.2196/jmir.7116
17. Hanlon P, Daines L, Campbell C, et al. Telehealth Interventions to Support Self-Management of Long-Term Conditions: A Systematic Metareview of Diabetes, Heart Failure, Asthma, Chronic Obstructive Pulmonary Disease, and Cancer. *J Med Internet Res* 2017;19(5):e172. doi: 10.2196/jmir.6688 [published Online First: 2017/05/21]
18. Talboom-Kamp EP, Verdijk NA, Kasteleyn MJ, et al. The Effect of Integration of Self-Management Web Platforms on Health Status in Chronic Obstructive Pulmonary Disease Management in Primary Care (e-Vita Study): Interrupted Time Series Design. *J Med Internet Res* 2017;19(8):e291. doi: 10.2196/jmir.8262 [published Online First: 2017/08/18]
19. Tistad M, Lundell S, Wiklund M, et al. Usefulness and Relevance of an eHealth Tool in Supporting the Self-Management of Chronic Obstructive Pulmonary Disease: Explorative Qualitative Study of a Cocreative Process. *JMIR Hum Factors* 2018;5(4):e10801. doi: 10.2196/10801 [published Online First: 2018/10/29]
20. Nyberg A, Wadell K, Lindgren H, et al. Internet-based support for self-management strategies for people with COPD-protocol for a controlled pragmatic pilot trial of effectiveness and a process evaluation in primary healthcare. *BMJ open* 2017;7(7):e016851. doi: 10.1136/bmjopen-2017-016851 [published Online First: 2017/08/03]
21. Nyberg A, Tistad M, Wadell K. Can the COPD web be used to promote self-management in patients with COPD in swedish primary care: a controlled pragmatic pilot trial with 3 month- and 12 month follow-up. *Scandinavian journal of primary health care* 2019:1-14. doi: 10.1080/02813432.2019.1569415 [published Online First: 2019/02/01]
22. Zwarenstein M, Treweek S, Gagnier JJ, et al. Improving the reporting of pragmatic trials: an extension of the CONSORT statement. *BMJ (Clinical research ed)* 2008;337:a2390. doi: 10.1136/bmj.a2390 [published Online First: 2008/11/13]
23. Chan A-W, Tetzlaff JM, Altman DG, et al. SPIRIT 2013 Statement: Defining Standard Protocol Items for Clinical Trials. *Annals of Internal Medicine* 2013;158(3):200-07. doi: 10.7326/0003-4819-158-3-201302050-00583
24. Chan AW, Tetzlaff JM, Gotzsche PC, et al. SPIRIT 2013 explanation and elaboration: guidance for protocols of clinical trials. *BMJ (Clinical research ed)* 2013;346:e7586. doi: 10.1136/bmj.e7586 [published Online First: 2013/01/11]
25. Eysenbach G. CONSORT-EHEALTH: Improving and Standardizing Evaluation Reports of Web-based and Mobile Health Interventions. *J Med Internet Res* 2011;13(4):e126. doi: 10.2196/jmir.1923 [published Online First: 31.12.2011]

- 1  
2  
3 26. Demeyer H, Louvaris Z, Frei A, et al. Physical activity is increased by a 12-week semiautomated  
4 telecoaching programme in patients with COPD: a multicentre randomised controlled trial.  
5 *Thorax* 2017;72(5):415-23. doi: 10.1136/thoraxjnl-2016-209026  
6  
7 27. Fry JP, Neff RA. Periodic Prompts and Reminders in Health Promotion and Health Behavior  
8 Interventions: Systematic Review. *J Med Internet Res* 2009;11(2):e16. doi: 10.2196/jmir.1138  
9 [published Online First: 14.5.2009]
- 10 28. Muench F, Baumel A. More Than a Text Message: Dismantling Digital Triggers to Curate Behavior  
11 Change in Patient-Centered Health Interventions. *J Med Internet Res* 2017;19(5):e147. doi:  
12 10.2196/jmir.7463 [published Online First: 2017/05/28]
- 13 29. Olsson SJG, Ekblom Ö, Andersson E, et al. Categorical answer modes provide superior validity to  
14 open answers when asking for level of physical activity: A cross-sectional study. *Scandinavian*  
15 *Journal of Public Health* 2016;44(1):70-76. doi: 10.1177/1403494815602830
- 16 30. Socialstyrelsen [The National Board of Health and Welfare]. Nationella riktlinjer för  
17 sjukdomsförebyggande metoder 2011 Tobaksbruk, riskbruk av alkohol, otillräcklig fysisk  
18 aktivitet och ohälsosamma matvanor Stöd för styrning och ledning [Disease Prevention in the  
19 Swedish Healthcare System: Health situation, national guidelines and implementation]. (In  
20 Swedish with an English summary). Västerås, Sweden: Socialstyrelsen, 2011. .
- 21 31. Demeyer H, Burtin C, Van Remoortel H, et al. Standardizing the analysis of physical activity in  
22 patients with COPD following a pulmonary rehabilitation program. *Chest* 2014;146(2):318-27.  
23 doi: 10.1378/chest.13-1968 [published Online First: 2014/03/08]
- 24 32. Andersson M, Janson C, Emtner M. Accuracy of three activity monitors in patients with chronic  
25 obstructive pulmonary disease: a comparison with video recordings. *Copd* 2014;11(5):560-7.  
26 doi: 10.3109/15412555.2014.898033 [published Online First: 2014/04/17]
- 27 33. Mahler DA, Wells CK. Evaluation of clinical methods for rating dyspnea. *Chest* 1988;93(3):580-6.  
28 [published Online First: 1988/03/01]
- 29 34. Vernooij RW, Willson M, Gagliardi AR. Characterizing patient-oriented tools that could be  
30 packaged with guidelines to promote self-management and guideline adoption: a meta-  
31 review. *Implementation science : IS* 2016;11:52. doi: 10.1186/s13012-016-0419-1 [published  
32 Online First: 2016/04/16]
- 33 35. Jones PW, Harding G, Berry P, et al. Development and first validation of the COPD Assessment  
34 Test. *The European respiratory journal* 2009;34(3):648-54. doi: 10.1183/09031936.00102509  
35 [published Online First: 2009/09/02]
- 36 36. Dolan P. Modeling valuations for EuroQol health states. *Medical care* 1997;35(11):1095-108.  
37 [published Online First: 1997/11/21]
- 38 37. Manca A, Hawkins N, Sculpher MJ. Estimating mean QALYs in trial-based cost-effectiveness  
39 analysis: the importance of controlling for baseline utility. *Health Economics* 2005;14(5):487-  
40 96. doi: 10.1002/hec.944
- 41 38. Puhan MA, Guyatt GH, Goldstein R, et al. Relative responsiveness of the Chronic Respiratory  
42 Questionnaire, St. Georges Respiratory Questionnaire and four other health-related quality  
43 of life instruments for patients with chronic lung disease. *Respiratory Medicine*  
44 2007;101(2):308-16. doi: <https://doi.org/10.1016/j.rmed.2006.04.023>
- 45 39. Bestall JC, Paul EA, Garrod R, et al. Usefulness of the Medical Research Council (MRC) dyspnoea  
46 scale as a measure of disability in patients with chronic obstructive pulmonary disease.  
47 *Thorax* 1999;54(7):581-6. [published Online First: 1999/06/22]
- 48 40. Rutten-van Molken MP, Oostenbrink JB, Tashkin DP, et al. Does quality of life of COPD patients as  
49 measured by the generic EuroQol five-dimension questionnaire differentiate between COPD  
50 severity stages? *Chest* 2006;130(4):1117-28. doi: 10.1378/chest.130.4.1117 [published  
51 Online First: 2006/10/13]
- 52 41. Demeyer H, Burtin C, Hornikx M, et al. The Minimal Important Difference in Physical Activity in  
53 Patients with COPD. *PLOS ONE* 2016;11(4):e0154587. doi: 10.1371/journal.pone.0154587  
54  
55  
56  
57  
58  
59  
60

- 1  
2  
3 42. Müllerová H, Shukla A, Hawkins A, et al. Risk factors for acute exacerbations of COPD in a primary  
4 care population: a retrospective observational cohort study. *BMJ open* 2014;4(12):e006171.  
5 doi: 10.1136/bmjopen-2014-006171  
6  
7 43. Graneheim UH, Lundman B. Qualitative content analysis in nursing research: concepts,  
8 procedures and measures to achieve trustworthiness. *Nurse education today*  
9 2004;24(2):105-12. doi: 10.1016/j.nedt.2003.10.001 [published Online First: 2004/02/11]  
10  
11 44. World Medical A. World medical association declaration of helsinki: Ethical principles for medical  
12 research involving human subjects. *JAMA* 2013;310(20):2191-94. doi:  
13 10.1001/jama.2013.281053  
14  
15  
16  
17  
18  
19  
20  
21  
22  
23  
24  
25  
26  
27  
28  
29  
30  
31  
32  
33  
34  
35  
36  
37  
38  
39  
40  
41  
42  
43  
44  
45  
46  
47  
48  
49  
50  
51  
52  
53  
54  
55  
56  
57  
58  
59  
60

For peer review only

Table 1. Participant timeline for enrolment, the intervention and assessments

| Timepoint                                                              | t <sup>-1</sup> screening/consent | t <sup>0</sup> baseline | t <sup>1</sup> start                                                                | t <sup>2</sup> 3 months | t <sup>3</sup> (interviews) | t <sup>4</sup> 12 months |
|------------------------------------------------------------------------|-----------------------------------|-------------------------|-------------------------------------------------------------------------------------|-------------------------|-----------------------------|--------------------------|
| <b>Enrolment</b>                                                       |                                   |                         |                                                                                     |                         |                             |                          |
| Eligibility screen                                                     | x                                 |                         |                                                                                     |                         |                             |                          |
| Informed consent                                                       |                                   | x                       |                                                                                     |                         |                             |                          |
| Allocation                                                             |                                   |                         | x                                                                                   |                         |                             |                          |
| <b>Intervention</b>                                                    |                                   |                         |                                                                                     |                         |                             |                          |
| The COPD Web                                                           |                                   |                         |  |                         |                             |                          |
| <b>Assessments</b>                                                     |                                   |                         |                                                                                     |                         |                             |                          |
| Sociodemographics (age, sex, anthropometry, diagnosis) <sup>1</sup>    |                                   | x                       |                                                                                     | x                       |                             | x                        |
| Pulmonary function <sup>2</sup>                                        | x                                 |                         |                                                                                     |                         |                             |                          |
| COPD-related symptoms <sup>1</sup>                                     |                                   | x                       |                                                                                     | x                       |                             | x                        |
| Dyspnea <sup>1</sup>                                                   |                                   | x                       |                                                                                     | x                       |                             | x                        |
| Health-related quality of life (HRQoL) <sup>1</sup>                    |                                   | x                       |                                                                                     | x                       |                             | x                        |
| Time spent in physical activity and training <sup>1</sup>              |                                   | x                       |                                                                                     | x                       |                             | x                        |
| Time being sedentary <sup>1</sup>                                      |                                   | x                       |                                                                                     | x                       |                             | x                        |
| Physical activity level (accelerometer) <sup>1</sup>                   |                                   | x                       |                                                                                     | x                       |                             | x                        |
| Implementation <sup>1,3</sup>                                          |                                   |                         | x                                                                                   | x                       | x                           | x                        |
| Response to and interaction with the COPD Web <sup>1</sup>             |                                   |                         |                                                                                     | x                       | x                           | x                        |
| COPD-related health care contacts <sup>1</sup>                         |                                   |                         |                                                                                     | x                       |                             | x                        |
| Enablers and Barriers for the use of a web-based solution <sup>1</sup> |                                   |                         |                                                                                     |                         | x                           |                          |

Data collection from <sup>1</sup> People with COPD, <sup>2</sup> Medical record, <sup>3</sup> Statistics from the website

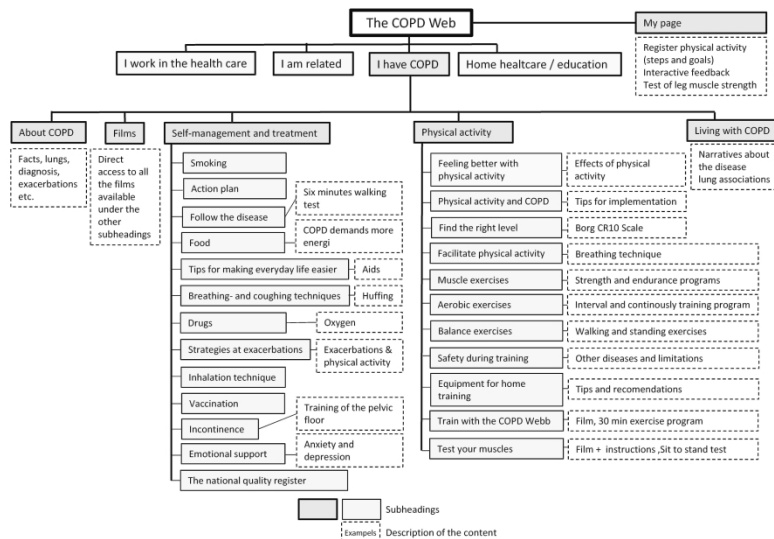

Figure 1. A website map of the COPD Web showing the section “I have COPD”.

297x209mm (300 x 300 DPI)

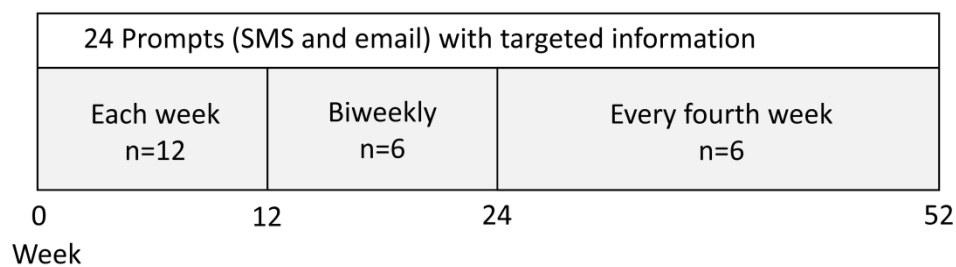

Figure 2. Distribution of prompts (SMS and email) to participants in the intervention group

183x57mm (600 x 600 DPI)



# Reporting checklist for protocol of a clinical trial.

Based on the SPIRIT guidelines.

## Instructions to authors

Complete this checklist by entering the page numbers from your manuscript where readers will find each of the items listed below.

Your article may not currently address all the items on the checklist. Please modify your text to include the missing information. If you are certain that an item does not apply, please write "n/a" and provide a short explanation.

Upload your completed checklist as an extra file when you submit to a journal.

In your methods section, say that you used the SPIRIT reporting guidelines, and cite them as:

Chan A-W, Tetzlaff JM, Altman DG, Laupacis A, Gøtzsche PC, Krleža-Jerić K, Hróbjartsson A, Mann H, Dickersin K, Berlin J, Doré C, Parulekar W, Summerskill W, Groves T, Schulz K, Sox H, Rockhold FW, Rennie D, Moher D. SPIRIT 2013 Statement: Defining standard protocol items for clinical trials. *Ann Intern Med.* 2013;158(3):200-207

|                    |     | Reporting Item                                                                                               | Page Number |
|--------------------|-----|--------------------------------------------------------------------------------------------------------------|-------------|
| Title              | #1  | Descriptive title identifying the study design, population, interventions, and, if applicable, trial acronym | 1           |
| Trial registration | #2a | Trial identifier and registry name. If not yet registered, name of intended registry                         | 2+13        |

|    |                     |     |                                                          |         |
|----|---------------------|-----|----------------------------------------------------------|---------|
| 1  | Trial registration: | #2b | All items from the World Health Organization Trial       | n/a     |
| 2  |                     |     |                                                          |         |
| 3  | data set            |     | Registration Data Set                                    |         |
| 4  |                     |     |                                                          |         |
| 5  |                     |     |                                                          |         |
| 6  | Protocol version    | #3  | Date and version identifier                              | n/a     |
| 7  |                     |     |                                                          |         |
| 8  |                     |     |                                                          |         |
| 9  | Funding             | #4  | Sources and types of financial, material, and other      | 15      |
| 10 |                     |     | support                                                  |         |
| 11 |                     |     |                                                          |         |
| 12 |                     |     |                                                          |         |
| 13 |                     |     |                                                          |         |
| 14 |                     |     |                                                          |         |
| 15 | Roles and           | #5a | Names, affiliations, and roles of protocol contributors  | 1+15-16 |
| 16 | responsibilities:   |     |                                                          |         |
| 17 |                     |     |                                                          |         |
| 18 | contributorship     |     |                                                          |         |
| 19 |                     |     |                                                          |         |
| 20 |                     |     |                                                          |         |
| 21 |                     |     |                                                          |         |
| 22 |                     |     |                                                          |         |
| 23 | Roles and           | #5b | Name and contact information for the trial sponsor       | n/a     |
| 24 | responsibilities:   |     |                                                          |         |
| 25 |                     |     |                                                          |         |
| 26 | sponsor contact     |     |                                                          |         |
| 27 |                     |     |                                                          |         |
| 28 | information         |     |                                                          |         |
| 29 |                     |     |                                                          |         |
| 30 |                     |     |                                                          |         |
| 31 |                     |     |                                                          |         |
| 32 | Roles and           | #5c | Role of study sponsor and funders, if any, in study      | 15      |
| 33 | responsibilities:   |     | design; collection, management, analysis, and            |         |
| 34 |                     |     | interpretation of data; writing of the report; and the   |         |
| 35 | sponsor and funder  |     | decision to submit the report for publication, including |         |
| 36 |                     |     | whether they will have ultimate authority over any of    |         |
| 37 |                     |     | these activities                                         |         |
| 38 |                     |     |                                                          |         |
| 39 |                     |     |                                                          |         |
| 40 |                     |     |                                                          |         |
| 41 |                     |     |                                                          |         |
| 42 |                     |     |                                                          |         |
| 43 |                     |     |                                                          |         |
| 44 |                     |     |                                                          |         |
| 45 |                     |     |                                                          |         |
| 46 |                     |     |                                                          |         |
| 47 | Roles and           | #5d | Composition, roles, and responsibilities of the          | n/a     |
| 48 | responsibilities:   |     | coordinating centre, steering committee, endpoint        |         |
| 49 |                     |     | adjudication committee, data management team, and        |         |
| 50 | committees          |     | other individuals or groups overseeing the trial, if     |         |
| 51 |                     |     | applicable (see Item 21a for data monitoring committee)  |         |
| 52 |                     |     |                                                          |         |
| 53 |                     |     |                                                          |         |
| 54 |                     |     |                                                          |         |
| 55 |                     |     |                                                          |         |
| 56 |                     |     |                                                          |         |
| 57 |                     |     |                                                          |         |
| 58 |                     |     |                                                          |         |
| 59 |                     |     |                                                          |         |
| 60 |                     |     |                                                          |         |

|    |                      |      |                                                              |      |
|----|----------------------|------|--------------------------------------------------------------|------|
| 1  | Background and       | #6a  | Description of research question and justification for       | 4    |
| 2  |                      |      |                                                              |      |
| 3  | rationale            |      | undertaking the trial, including summary of relevant         |      |
| 4  |                      |      |                                                              |      |
| 5  |                      |      | studies (published and unpublished) examining benefits       |      |
| 6  |                      |      |                                                              |      |
| 7  |                      |      | and harms for each intervention                              |      |
| 8  |                      |      |                                                              |      |
| 9  |                      |      |                                                              |      |
| 10 |                      |      |                                                              |      |
| 11 | Background and       | #6b  | Explanation for choice of comparators                        | 4    |
| 12 |                      |      |                                                              |      |
| 13 | rationale: choice of |      |                                                              |      |
| 14 |                      |      |                                                              |      |
| 15 | comparators          |      |                                                              |      |
| 16 |                      |      |                                                              |      |
| 17 |                      |      |                                                              |      |
| 18 | Objectives           | #7   | Specific objectives or hypotheses                            | 5    |
| 19 |                      |      |                                                              |      |
| 20 |                      |      |                                                              |      |
| 21 |                      |      |                                                              |      |
| 22 | Trial design         | #8   | Description of trial design including type of trial (eg,     | 5+11 |
| 23 |                      |      |                                                              |      |
| 24 |                      |      | parallel group, crossover, factorial, single group),         |      |
| 25 |                      |      |                                                              |      |
| 26 |                      |      | allocation ratio, and framework (eg, superiority,            |      |
| 27 |                      |      |                                                              |      |
| 28 |                      |      | equivalence, non-inferiority, exploratory)                   |      |
| 29 |                      |      |                                                              |      |
| 30 |                      |      |                                                              |      |
| 31 |                      |      |                                                              |      |
| 32 | Study setting        | #9   | Description of study settings (eg, community clinic,         | 6    |
| 33 |                      |      |                                                              |      |
| 34 |                      |      | academic hospital) and list of countries where data will be  |      |
| 35 |                      |      |                                                              |      |
| 36 |                      |      | collected. Reference to where list of study sites can be     |      |
| 37 |                      |      |                                                              |      |
| 38 |                      |      | obtained                                                     |      |
| 39 |                      |      |                                                              |      |
| 40 |                      |      |                                                              |      |
| 41 |                      |      |                                                              |      |
| 42 | Eligibility criteria | #10  | Inclusion and exclusion criteria for participants. If        | 5-6  |
| 43 |                      |      |                                                              |      |
| 44 |                      |      | applicable, eligibility criteria for study centres and       |      |
| 45 |                      |      |                                                              |      |
| 46 |                      |      | individuals who will perform the interventions (eg,          |      |
| 47 |                      |      |                                                              |      |
| 48 |                      |      | surgeons, psychotherapists)                                  |      |
| 49 |                      |      |                                                              |      |
| 50 |                      |      |                                                              |      |
| 51 | Interventions:       | #11a | Interventions for each group with sufficient detail to allow | 7-8  |
| 52 |                      |      |                                                              |      |
| 53 | description          |      | replication, including how and when they will be             |      |
| 54 |                      |      |                                                              |      |
| 55 |                      |      | administered                                                 |      |
| 56 |                      |      |                                                              |      |
| 57 |                      |      |                                                              |      |
| 58 |                      |      |                                                              |      |
| 59 |                      |      |                                                              |      |
| 60 |                      |      |                                                              |      |

|    |                      |      |                                                            |        |
|----|----------------------|------|------------------------------------------------------------|--------|
| 1  | Interventions:       | #11b | Criteria for discontinuing or modifying allocated          | 13     |
| 2  |                      |      |                                                            |        |
| 3  | modifications        |      | interventions for a given trial participant (eg, drug dose |        |
| 4  |                      |      | change in response to harms, participant request, or       |        |
| 5  |                      |      | improving / worsening disease)                             |        |
| 6  |                      |      |                                                            |        |
| 7  |                      |      |                                                            |        |
| 8  |                      |      |                                                            |        |
| 9  |                      |      |                                                            |        |
| 10 |                      |      |                                                            |        |
| 11 | Interventions:       | #11c | Strategies to improve adherence to intervention            | 8      |
| 12 |                      |      |                                                            |        |
| 13 | adherence            |      | protocols, and any procedures for monitoring adherence     |        |
| 14 |                      |      | (eg, drug tablet return; laboratory tests)                 |        |
| 15 |                      |      |                                                            |        |
| 16 |                      |      |                                                            |        |
| 17 |                      |      |                                                            |        |
| 18 |                      |      |                                                            |        |
| 19 | Interventions:       | #11d | Relevant concomitant care and interventions that are       | n/a    |
| 20 |                      |      | permitted or prohibited during the trial                   |        |
| 21 | concomitant care     |      |                                                            |        |
| 22 |                      |      |                                                            |        |
| 23 |                      |      |                                                            |        |
| 24 | Outcomes             | #12  | Primary, secondary, and other outcomes, including the      | 8-10   |
| 25 |                      |      | specific measurement variable (eg, systolic blood          |        |
| 26 |                      |      | pressure), analysis metric (eg, change from baseline,      |        |
| 27 |                      |      | final value, time to event), method of aggregation (eg,    |        |
| 28 |                      |      | median, proportion), and time point for each outcome.      |        |
| 29 |                      |      | Explanation of the clinical relevance of chosen efficacy   |        |
| 30 |                      |      | and harm outcomes is strongly recommended                  |        |
| 31 |                      |      |                                                            |        |
| 32 |                      |      |                                                            |        |
| 33 |                      |      |                                                            |        |
| 34 |                      |      |                                                            |        |
| 35 |                      |      |                                                            |        |
| 36 |                      |      |                                                            |        |
| 37 |                      |      |                                                            |        |
| 38 |                      |      |                                                            |        |
| 39 |                      |      |                                                            |        |
| 40 |                      |      |                                                            |        |
| 41 | Participant timeline | #13  | Time schedule of enrolment, interventions (including any   | 6-7+20 |
| 42 |                      |      | run-ins and washouts), assessments, and visits for         |        |
| 43 |                      |      | participants. A schematic diagram is highly recommended    |        |
| 44 |                      |      | (see Figure)                                               |        |
| 45 |                      |      |                                                            |        |
| 46 |                      |      |                                                            |        |
| 47 |                      |      |                                                            |        |
| 48 |                      |      |                                                            |        |
| 49 |                      |      |                                                            |        |
| 50 |                      |      |                                                            |        |
| 51 | Sample size          | #14  | Estimated number of participants needed to achieve         | 11     |
| 52 |                      |      | study objectives and how it was determined, including      |        |
| 53 |                      |      | clinical and statistical assumptions supporting any sample |        |
| 54 |                      |      | size calculations                                          |        |
| 55 |                      |      |                                                            |        |
| 56 |                      |      |                                                            |        |
| 57 |                      |      |                                                            |        |
| 58 |                      |      |                                                            |        |
| 59 |                      |      |                                                            |        |
| 60 |                      |      |                                                            |        |

|    |                      |      |                                                             |     |
|----|----------------------|------|-------------------------------------------------------------|-----|
| 1  | Recruitment          | #15  | Strategies for achieving adequate participant enrolment     | 6   |
| 2  |                      |      |                                                             |     |
| 3  |                      |      | to reach target sample size                                 |     |
| 4  |                      |      |                                                             |     |
| 5  |                      |      |                                                             |     |
| 6  | Allocation: sequence | #16a | Method of generating the allocation sequence (eg,           | 11  |
| 7  | generation           |      | computer-generated random numbers), and list of any         |     |
| 8  |                      |      | factors for stratification. To reduce predictability of a   |     |
| 9  |                      |      | random sequence, details of any planned restriction (eg,    |     |
| 10 |                      |      | blocking) should be provided in a separate document that    |     |
| 11 |                      |      | is unavailable to those who enrol participants or assign    |     |
| 12 |                      |      | interventions                                               |     |
| 13 |                      |      |                                                             |     |
| 14 | Allocation           | #16b | Mechanism of implementing the allocation sequence (eg,      | 11  |
| 15 | concealment          |      | central telephone; sequentially numbered, opaque,           |     |
| 16 | mechanism            |      | sealed envelopes), describing any steps to conceal the      |     |
| 17 |                      |      | sequence until interventions are assigned                   |     |
| 18 |                      |      |                                                             |     |
| 19 | Allocation:          | #16c | Who will generate the allocation sequence, who will enrol   | 11  |
| 20 | implementation       |      | participants, and who will assign participants to           |     |
| 21 |                      |      | interventions                                               |     |
| 22 |                      |      |                                                             |     |
| 23 | Blinding (masking)   | #17a | Who will be blinded after assignment to interventions (eg,  | 12  |
| 24 |                      |      | trial participants, care providers, outcome assessors, data |     |
| 25 |                      |      | analysts), and how                                          |     |
| 26 |                      |      |                                                             |     |
| 27 | Blinding (masking):  | #17b | If blinded, circumstances under which unblinding is         | n/a |
| 28 | emergency            |      | permissible, and procedure for revealing a participant's    |     |
| 29 | unblinding           |      | allocated intervention during the trial                     |     |
| 30 |                      |      |                                                             |     |
| 31 |                      |      |                                                             |     |
| 32 |                      |      |                                                             |     |
| 33 |                      |      |                                                             |     |
| 34 |                      |      |                                                             |     |
| 35 |                      |      |                                                             |     |
| 36 |                      |      |                                                             |     |
| 37 |                      |      |                                                             |     |
| 38 |                      |      |                                                             |     |
| 39 |                      |      |                                                             |     |
| 40 |                      |      |                                                             |     |
| 41 |                      |      |                                                             |     |
| 42 |                      |      |                                                             |     |
| 43 |                      |      |                                                             |     |
| 44 |                      |      |                                                             |     |
| 45 |                      |      |                                                             |     |
| 46 |                      |      |                                                             |     |
| 47 |                      |      |                                                             |     |
| 48 |                      |      |                                                             |     |
| 49 |                      |      |                                                             |     |
| 50 |                      |      |                                                             |     |
| 51 |                      |      |                                                             |     |
| 52 |                      |      |                                                             |     |
| 53 |                      |      |                                                             |     |
| 54 |                      |      |                                                             |     |
| 55 |                      |      |                                                             |     |
| 56 |                      |      |                                                             |     |
| 57 |                      |      |                                                             |     |
| 58 |                      |      |                                                             |     |
| 59 |                      |      |                                                             |     |
| 60 |                      |      |                                                             |     |

|    |                        |      |                                                                |       |
|----|------------------------|------|----------------------------------------------------------------|-------|
| 1  | Data collection plan   | #18a | Plans for assessment and collection of outcome,                | 8-11  |
| 2  |                        |      | baseline, and other trial data, including any related          |       |
| 3  |                        |      | processes to promote data quality (eg, duplicate               |       |
| 4  |                        |      | measurements, training of assessors) and a description         |       |
| 5  |                        |      | of study instruments (eg, questionnaires, laboratory tests)    |       |
| 6  |                        |      | along with their reliability and validity, if known. Reference |       |
| 7  |                        |      | to where data collection forms can be found, if not in the     |       |
| 8  |                        |      | protocol                                                       |       |
| 9  |                        |      |                                                                |       |
| 10 | Data collection plan:  | #18b | Plans to promote participant retention and complete            | 7     |
| 11 | retention              |      | follow-up, including list of any outcome data to be            |       |
| 12 |                        |      | collected for participants who discontinue or deviate from     |       |
| 13 |                        |      | intervention protocols                                         |       |
| 14 |                        |      |                                                                |       |
| 15 | Data management        | #19  | Plans for data entry, coding, security, and storage,           | 12    |
| 16 |                        |      | including any related processes to promote data quality        |       |
| 17 |                        |      | (eg, double data entry; range checks for data values).         |       |
| 18 |                        |      | Reference to where details of data management                  |       |
| 19 |                        |      | procedures can be found, if not in the protocol                |       |
| 20 |                        |      |                                                                |       |
| 21 | Statistics: outcomes   | #20a | Statistical methods for analysing primary and secondary        | 12-13 |
| 22 |                        |      | outcomes. Reference to where other details of the              |       |
| 23 |                        |      | statistical analysis plan can be found, if not in the protocol |       |
| 24 |                        |      |                                                                |       |
| 25 | Statistics: additional | #20b | Methods for any additional analyses (eg, subgroup and          | 12    |
| 26 | analyses               |      | adjusted analyses)                                             |       |
| 27 |                        |      |                                                                |       |
| 28 |                        |      |                                                                |       |
| 29 |                        |      |                                                                |       |
| 30 |                        |      |                                                                |       |
| 31 |                        |      |                                                                |       |
| 32 |                        |      |                                                                |       |
| 33 |                        |      |                                                                |       |
| 34 |                        |      |                                                                |       |
| 35 |                        |      |                                                                |       |
| 36 |                        |      |                                                                |       |
| 37 |                        |      |                                                                |       |
| 38 |                        |      |                                                                |       |
| 39 |                        |      |                                                                |       |
| 40 |                        |      |                                                                |       |
| 41 |                        |      |                                                                |       |
| 42 |                        |      |                                                                |       |
| 43 |                        |      |                                                                |       |
| 44 |                        |      |                                                                |       |
| 45 |                        |      |                                                                |       |
| 46 |                        |      |                                                                |       |
| 47 |                        |      |                                                                |       |
| 48 |                        |      |                                                                |       |
| 49 |                        |      |                                                                |       |
| 50 |                        |      |                                                                |       |
| 51 |                        |      |                                                                |       |
| 52 |                        |      |                                                                |       |
| 53 |                        |      |                                                                |       |
| 54 |                        |      |                                                                |       |
| 55 |                        |      |                                                                |       |
| 56 |                        |      |                                                                |       |
| 57 |                        |      |                                                                |       |
| 58 |                        |      |                                                                |       |
| 59 |                        |      |                                                                |       |
| 60 |                        |      |                                                                |       |

|    |                      |      |                                                             |         |
|----|----------------------|------|-------------------------------------------------------------|---------|
| 1  | Statistics: analysis | #20c | Definition of analysis population relating to protocol non- | 12      |
| 2  |                      |      |                                                             |         |
| 3  | population and       |      | adherence (eg, as randomised analysis), and any             |         |
| 4  |                      |      |                                                             |         |
| 5  | missing data         |      | statistical methods to handle missing data (eg, multiple    |         |
| 6  |                      |      |                                                             |         |
| 7  |                      |      | imputation)                                                 |         |
| 8  |                      |      |                                                             |         |
| 9  |                      |      |                                                             |         |
| 10 |                      |      |                                                             |         |
| 11 | Data monitoring:     | #21a | Composition of data monitoring committee (DMC);             | n/a     |
| 12 |                      |      |                                                             |         |
| 13 | formal committee     |      | summary of its role and reporting structure; statement of   |         |
| 14 |                      |      |                                                             |         |
| 15 |                      |      | whether it is independent from the sponsor and              |         |
| 16 |                      |      | competing interests; and reference to where further         |         |
| 17 |                      |      | details about its charter can be found, if not in the       |         |
| 18 |                      |      | protocol. Alternatively, an explanation of why a DMC is     |         |
| 19 |                      |      | not needed                                                  |         |
| 20 |                      |      |                                                             |         |
| 21 |                      |      |                                                             |         |
| 22 |                      |      |                                                             |         |
| 23 |                      |      |                                                             |         |
| 24 |                      |      |                                                             |         |
| 25 |                      |      |                                                             |         |
| 26 |                      |      |                                                             |         |
| 27 |                      |      |                                                             |         |
| 28 | Data monitoring:     | #21b | Description of any interim analyses and stopping            | 12      |
| 29 |                      |      |                                                             |         |
| 30 | interim analysis     |      | guidelines, including who will have access to these         |         |
| 31 |                      |      |                                                             |         |
| 32 |                      |      | interim results and make the final decision to terminate    |         |
| 33 |                      |      |                                                             |         |
| 34 |                      |      | the trial                                                   |         |
| 35 |                      |      |                                                             |         |
| 36 |                      |      |                                                             |         |
| 37 |                      |      |                                                             |         |
| 38 | Harms                | #22  | Plans for collecting, assessing, reporting, and managing    | 9       |
| 39 |                      |      |                                                             |         |
| 40 |                      |      | solicited and spontaneously reported adverse events and     |         |
| 41 |                      |      |                                                             |         |
| 42 |                      |      | other unintended effects of trial interventions or trial    |         |
| 43 |                      |      |                                                             |         |
| 44 |                      |      | conduct                                                     |         |
| 45 |                      |      |                                                             |         |
| 46 |                      |      |                                                             |         |
| 47 |                      |      |                                                             |         |
| 48 | Auditing             | #23  | Frequency and procedures for auditing trial conduct, if     | n/a     |
| 49 |                      |      |                                                             |         |
| 50 |                      |      | any, and whether the process will be independent from       |         |
| 51 |                      |      |                                                             |         |
| 52 |                      |      | investigators and the sponsor                               |         |
| 53 |                      |      |                                                             |         |
| 54 |                      |      |                                                             |         |
| 55 | Research ethics      | #24  | Plans for seeking research ethics committee / institutional | 2+13+15 |
| 56 |                      |      |                                                             |         |
| 57 | approval             |      | review board (REC / IRB) approval                           |         |
| 58 |                      |      |                                                             |         |
| 59 |                      |      |                                                             |         |
| 60 |                      |      |                                                             |         |

|    |                    |      |                                                                |         |
|----|--------------------|------|----------------------------------------------------------------|---------|
| 1  | Protocol           | #25  | Plans for communicating important protocol modifications       | 13      |
| 2  |                    |      |                                                                |         |
| 3  | amendments         |      | (eg, changes to eligibility criteria, outcomes, analyses) to   |         |
| 4  |                    |      | relevant parties (eg, investigators, REC / IRBs, trial         |         |
| 5  |                    |      | participants, trial registries, journals, regulators)          |         |
| 6  |                    |      |                                                                |         |
| 7  |                    |      |                                                                |         |
| 8  |                    |      |                                                                |         |
| 9  |                    |      |                                                                |         |
| 10 |                    |      |                                                                |         |
| 11 | Consent or assent  | #26a | Who will obtain informed consent or assent from potential      | 6+12-13 |
| 12 |                    |      | trial participants or authorised surrogates, and how (see      |         |
| 13 |                    |      | Item 32)                                                       |         |
| 14 |                    |      |                                                                |         |
| 15 |                    |      |                                                                |         |
| 16 |                    |      |                                                                |         |
| 17 |                    |      |                                                                |         |
| 18 |                    |      |                                                                |         |
| 19 | Consent or assent: | #26b | Additional consent provisions for collection and use of        | n/a     |
| 20 | ancillary studies  |      | participant data and biological specimens in ancillary         |         |
| 21 |                    |      | studies, if applicable                                         |         |
| 22 |                    |      |                                                                |         |
| 23 |                    |      |                                                                |         |
| 24 |                    |      |                                                                |         |
| 25 |                    |      |                                                                |         |
| 26 | Confidentiality    | #27  | How personal information about potential and enrolled          | 12      |
| 27 |                    |      | participants will be collected, shared, and maintained in      |         |
| 28 |                    |      | order to protect confidentiality before, during, and after     |         |
| 29 |                    |      | the trial                                                      |         |
| 30 |                    |      |                                                                |         |
| 31 |                    |      |                                                                |         |
| 32 |                    |      |                                                                |         |
| 33 |                    |      |                                                                |         |
| 34 |                    |      |                                                                |         |
| 35 |                    |      |                                                                |         |
| 36 | Declaration of     | #28  | Financial and other competing interests for principal          | 14      |
| 37 | interests          |      | investigators for the overall trial and each study site        |         |
| 38 |                    |      |                                                                |         |
| 39 |                    |      |                                                                |         |
| 40 |                    |      |                                                                |         |
| 41 |                    |      |                                                                |         |
| 42 | Data access        | #29  | Statement of who will have access to the final trial           | 12      |
| 43 |                    |      | dataset, and disclosure of contractual agreements that         |         |
| 44 |                    |      | limit such access for investigators                            |         |
| 45 |                    |      |                                                                |         |
| 46 |                    |      |                                                                |         |
| 47 |                    |      |                                                                |         |
| 48 |                    |      |                                                                |         |
| 49 | Ancillary and post | #30  | Provisions, if any, for ancillary and post-trial care, and for | n/a     |
| 50 | trial care         |      | compensation to those who suffer harm from trial               |         |
| 51 |                    |      | participation                                                  |         |
| 52 |                    |      |                                                                |         |
| 53 |                    |      |                                                                |         |
| 54 |                    |      |                                                                |         |
| 55 |                    |      |                                                                |         |
| 56 |                    |      |                                                                |         |
| 57 |                    |      |                                                                |         |
| 58 |                    |      |                                                                |         |
| 59 |                    |      |                                                                |         |
| 60 |                    |      |                                                                |         |



|    |                       |      |                                                               |     |
|----|-----------------------|------|---------------------------------------------------------------|-----|
| 1  | Dissemination         | #31a | Plans for investigators and sponsor to communicate trial      | 13  |
| 2  |                       |      |                                                               |     |
| 3  | policy: trial results |      | results to participants, healthcare professionals, the        |     |
| 4  |                       |      | public, and other relevant groups (eg, via publication,       |     |
| 5  |                       |      | reporting in results databases, or other data sharing         |     |
| 6  |                       |      | arrangements), including any publication restrictions         |     |
| 7  |                       |      |                                                               |     |
| 8  |                       |      |                                                               |     |
| 9  |                       |      |                                                               |     |
| 10 |                       |      |                                                               |     |
| 11 |                       |      |                                                               |     |
| 12 |                       |      |                                                               |     |
| 13 | Dissemination         | #31b | Authorship eligibility guidelines and any intended use of     | n/a |
| 14 |                       |      | professional writers                                          |     |
| 15 | policy: authorship    |      |                                                               |     |
| 16 |                       |      |                                                               |     |
| 17 |                       |      |                                                               |     |
| 18 |                       |      |                                                               |     |
| 19 | Dissemination         | #31c | Plans, if any, for granting public access to the full         | n/a |
| 20 |                       |      | protocol, participant-level dataset, and statistical code     |     |
| 21 | policy: reproducible  |      |                                                               |     |
| 22 |                       |      |                                                               |     |
| 23 | research              |      |                                                               |     |
| 24 |                       |      |                                                               |     |
| 25 |                       |      |                                                               |     |
| 26 | Informed consent      | #32  | Model consent form and other related documentation            | n/a |
| 27 |                       |      | given to participants and authorised surrogates               |     |
| 28 | materials             |      |                                                               |     |
| 29 |                       |      |                                                               |     |
| 30 |                       |      |                                                               |     |
| 31 |                       |      |                                                               |     |
| 32 | Biological            | #33  | Plans for collection, laboratory evaluation, and storage of   | n/a |
| 33 |                       |      | biological specimens for genetic or molecular analysis in     |     |
| 34 | specimens             |      | the current trial and for future use in ancillary studies, if |     |
| 35 |                       |      | applicable                                                    |     |
| 36 |                       |      |                                                               |     |
| 37 |                       |      |                                                               |     |
| 38 |                       |      |                                                               |     |
| 39 |                       |      |                                                               |     |
| 40 |                       |      |                                                               |     |

41  
 42 The SPIRIT checklist is distributed under the terms of the Creative Commons Attribution License CC-  
 43 BY-ND 3.0. This checklist was completed on 29. March 2019 using <https://www.goodreports.org/>, a  
 44 tool made by the [EQUATOR Network](#) in collaboration with [Penelope.ai](#)  
 45  
 46  
 47  
 48  
 49  
 50  
 51  
 52  
 53  
 54  
 55  
 56  
 57  
 58  
 59  
 60

# BMJ Open

**Web-based support for self-management strategies versus usual care for people with COPD in primary healthcare: a protocol for a randomised, 12 months, parallel-group pragmatic trial.**

|                                 |                                                                                                                                                                                                                                                                                                                                                                                                                     |
|---------------------------------|---------------------------------------------------------------------------------------------------------------------------------------------------------------------------------------------------------------------------------------------------------------------------------------------------------------------------------------------------------------------------------------------------------------------|
| Journal:                        | <i>BMJ Open</i>                                                                                                                                                                                                                                                                                                                                                                                                     |
| Manuscript ID                   | bmjopen-2019-030788.R1                                                                                                                                                                                                                                                                                                                                                                                              |
| Article Type:                   | Protocol                                                                                                                                                                                                                                                                                                                                                                                                            |
| Date Submitted by the Author:   | 22-Aug-2019                                                                                                                                                                                                                                                                                                                                                                                                         |
| Complete List of Authors:       | Stenlund, Tobias; Umea University Department of Community Medicine and Rehabilitation, Physiotherapy<br>Nyberg, André; Umea University Department of Community Medicine and Rehabilitation, Physiotherapy<br>Lundell, Sara; Umea University Department of Community Medicine and Rehabilitation, Physiotherapy<br>Wadell, Karin; Umea University Department of Community Medicine and Rehabilitation, Physiotherapy |
| <b>Primary Subject Heading</b>: | Respiratory medicine                                                                                                                                                                                                                                                                                                                                                                                                |
| Secondary Subject Heading:      | Health informatics                                                                                                                                                                                                                                                                                                                                                                                                  |
| Keywords:                       | Pulmonary Disease, Chronic obstructive, eHealth, self-management strategies, PRIMARY CARE                                                                                                                                                                                                                                                                                                                           |
|                                 |                                                                                                                                                                                                                                                                                                                                                                                                                     |

SCHOLARONE™  
Manuscripts

1  
2  
3  
4 **Web-based support for self-management strategies versus usual care for**  
5 **people with COPD in primary healthcare: a protocol for a randomised, 12**  
6 **months, parallel-group pragmatic trial.**  
7  
8

9  
10 **AUTHORS**

11 Tobias Stenlund, PhD, Dept. of Community Medicine and Rehabilitation, Physiotherapy, Umeå  
12 University, Umeå, 90187 Sweden. Tel.: +46907868040. E-mail: [tobias.stenlund@umu.se](mailto:tobias.stenlund@umu.se)

13  
14  
15 André Nyberg, Associate Professor, Dept. of Community Medicine and Rehabilitation, Physiotherapy,  
16 Umeå University, Umeå, 90187 Sweden. E-mail: [andre.nyberg@umu.se](mailto:andre.nyberg@umu.se)

17  
18  
19 Sara Lundell, PhD, Dept. of Community Medicine and Rehabilitation, Physiotherapy, Umeå University,  
20 Umeå, 90187 Sweden. E-mail: [sara.lundell@umu.se](mailto:sara.lundell@umu.se)

21  
22  
23 Karin Wadell, Professor, Dept. of Community Medicine and Rehabilitation, Physiotherapy, Umeå  
24 University, Umeå, 90187 Sweden. E-mail: [karin.wadell@umu.se](mailto:karin.wadell@umu.se)

25  
26  
27 Corresponding author: PhD Tobias Stenlund Dept. of Community Medicine and Rehabilitation,  
28 Physiotherapy, Umeå University, Umeå, 90187 Sweden. Tel.: +46907868040. E-mail:  
29 [tobias.stenlund@umu.se](mailto:tobias.stenlund@umu.se)  
30  
31

32  
33  
34 Keywords: Pulmonary Disease, Chronic obstructive; eHealth; primary care; self-management  
35 strategies  
36

37  
38 Word Count: 3976  
39  
40  
41  
42  
43  
44  
45  
46  
47  
48  
49  
50  
51  
52  
53  
54  
55  
56  
57  
58  
59  
60

## ABSTRACT

### Introduction

The use of adequate self-management strategies for people with chronic obstructive pulmonary disease (COPD) may increase level of physical activity (PA), improve health-related quality of life (HRQoL) and reduce healthcare use. Whether web-based support in addition to prompts (e-mail and SMS) could be used to promote self-management strategies to facilitate behavior change in people with COPD is not clear. This clinical trial aims to generate evidence on the effect of a web-based solution, the COPD Web, in a cohort of people with COPD in a primary healthcare context.

### Methods and analysis

The overall design is a pragmatic randomised controlled trial with pre- and post-assessments (3 and 12 months) and a implementation and user experience evaluation. People with a diagnosis of COPD, treated in primary healthcare will be eligible for the study. A total of 144 participants will be enrolled by healthcare professionals at included primary healthcare units and, after fulfilled baseline assessments, randomised to either control or intervention group. All participants will receive usual care, a pedometer and a leaflet about the importance of PA. Participants in the intervention will, in addition, get access to the COPD Web, an interactive self-managed website that aims to support people with COPD in self-management strategies. They will also continuously get support from prompts with focus on behaviour change.

The effect on participants' PA, dyspnea, COPD related symptoms, HRQoL, and health economics will be assessed using accelerometer and questionnaires. To identify enablers and barriers for the use of web-based support to change behavior, semistructured interviews will be conducted in a subgroup of participants at the 3 months follow-up.

### Ethics and dissemination

Ethical approval has been received from the Regional Ethical Review Board in Umeå, Sweden. Dnr 2018-274-31. Findings will be presented at conferences, submitted for publication in peer-reviewed journals and presented to the involved healthcare professionals, participants and patient organisations.

### Trial registration number

ClinicalTrials.gov: NCT03746873

## Article Summary

### Strengths and limitations of this study

- Physical activity level will be objectively measured and bring the field forward regarding knowledge about both short- and long-term effects of using web-based support.
- Information on how and how much the participants have used the COPD Web will automatically be collected and analysed throughout the full intervention period, which will increase the understanding of the link between use of the COPD Web and the possible effects.
- The pragmatic design with generous inclusion criteria and many recruiting primary healthcare units could enhance external validity.
- Prompts will be sent continuously as a reminder and strategy to encourage greater exposures to the COPD Web.
- One limitation is that the sample size is large enough for analysing the effect on physical activity level but may not be large enough for all secondary outcomes.

## Introduction

### Background and rationale

Chronic obstructive pulmonary disease (COPD) is a chronic and disabling disease with substantial morbidity and mortality. The disease has a steady increase in prevalence and is now the third leading cause of death worldwide.<sup>1</sup> The high prevalence places a considerable burden on the healthcare system with a total yearly cost of COPD in Sweden estimated to 13.9 billion SEK.<sup>2</sup> The mean annual total costs for each person with COPD is 67% higher compared to a person without COPD.<sup>3</sup>

The symptom burden of the disease; respiratory symptoms as progressive dyspnea, fatigue, impaired physical performance, decreased level of physical activity (PA) and health-related quality of life (HRQoL)<sup>4</sup> is not only a consequence of the underlying condition, but depend also on the individuals' adaptation to the illness and their ability to manage their disease.<sup>5,6</sup> Self-management strategies, including strategies to promote change in health behaviour by increasing the individual's knowledge and skills and their confidence in successfully managing their disease, is therefore now an essential part of COPD management.<sup>5</sup> This have shown to reduce breathlessness and impact of COPD in daily life, increase physical performance, level of PA, HRQoL, adherence to medication, as well as improve time to recovery after acute exacerbations and reduce overall health-related costs.<sup>5,7,8</sup> An increased level of PA is of utmost importance and something to promote<sup>9</sup> since PA has been shown to be decreased early in the disease progression<sup>10</sup> and degree of PA is considered the strongest predictor of all-cause mortality in people with COPD.<sup>11,12</sup>

Despite that treatment guidelines and literature strongly supports that non-pharmacological treatment (i.e., education, self-management strategies, exercise training)<sup>13</sup> should be provided, the vast majority of people with COPD are still excluded from these activities.<sup>14,15</sup> Web-based solutions are promising means of delivering health service, and may increase level of PA<sup>16,17</sup> as well as reduced use of health services.<sup>18</sup> However, studies evaluating whether web-based support could be used to promote self-management strategies to support increased PA in people with COPD are contradictory. One showed no effect on PA while other studies showed improved PA<sup>19-21</sup> but that the improvement may not be sustained over a long duration.<sup>21</sup>

The COPD Web is a web-based solution, developed by our research group in co-creation with people with COPD, their relatives, healthcare professionals in primary healthcare (PHC) and researchers.<sup>22</sup> In a pilot study on 83 people with COPD<sup>23,24</sup> promising results with increased self-reported level of PA were shown. To know whether this is true also for a larger COPD population an adequately powered randomised controlled trial with short and long-term evaluation is needed.

## Objectives

The main aim is to generate evidence on the effect of the COPD Web in a cohort of people with COPD, currently enrolled for usual care within the PHC context in Sweden. This is of importance, as the vast majority of people with COPD are treated within PHC.<sup>13 15</sup> The specific aims are to evaluate the short and long-term effect of the use of the COPD Web in an adequately powered group of people with COPD in PHC context, regarding i) level of PA; ii) dyspnea iii) HRQoL, iv) COPD related symptoms, v) health economics in relation to healthcare use; and vi) to identify enablers and barriers for the the use of web-based support with the COPD Web in order to change behavior.

We hypothesise that access and use of the COPD Web, in comparison to usual care, will:

- i) increase level of objectively measured PA in people with COPD,
- ii) decrease dyspnea,
- iii) increase disease-specific HRQoL,
- iv) decrease number of and/or severity of COPD-related symptoms, and
- v) decrease number of COPD-related healthcare contacts in PHC.

## Methods and analysis

### Trial design

The design is a pragmatic randomised controlled trial with pre- and post-assessments (3 and 12 months) in addition to a user experience and implementation evaluation. The user experience and implementation evaluation is a necessary complement to understand more about enablers and barriers for behavior change using web-based support. The study is designed as a pragmatic trial<sup>25</sup> meaning that healthcare professionals, primarily COPD nurses, are involved in recruiting participants, the access to the intervention (COPD Web) is given by the researchers, but the intervention itself only uses self-instructional material and prompts (SMS and email). This design aims to minimise the effort from healthcare professionals and increase the possibility of self-management for people with COPD to improve the applicability of the findings to other healthcare settings. The protocol complies with the SPIRIT (Standard Protocol Items: Recommendations for Interventional Trials) recommendations for protocol reporting<sup>26 27</sup> checklist (Additional file 1) and the study will be reported according to CONSORT (Consolidated Standards of Reporting Trials) guidelines for pragmatic trials<sup>25</sup> and eHealth.<sup>28</sup>

### Patient and Public Involvement (PPI)

We did not directly include PPI in this study, but our research group in co-creation with PPI developed the COPD Web used in the study.

## Participants and intervention

### Study settings

PHC units from different County Councils in Sweden, will constitute the study sites. The number of units are not limited; consequently, more units may be included during the study. At present 25 units are included, 13 of them situated in urban areas and 12 located in smaller cities or rural areas. The number of enrolled citizens at the included units range between 5,700 and 20,300 citizens. One unit has no enrolled citizens but act as a rehabilitation unit that treats patients with a referral from other PHC units. We will include both publicly funded PHC units and private alternatives.

### Eligibility criteria

The trial will be conducted from 15 November 2018 until 144 participants are included. All people with a diagnosis of COPD (ICD-10:J44:9) who visit involved PHCCs due to their COPD will be eligible for inclusion in the study if they 1) can read and understand Swedish, 2) have a smartphone, tablet or computer with access to internet, 3) don't have dementia or other psychiatric condition that can prevent understanding of the intervention, 4) don't have severe comorbidity that can be considered as the contributing factor for limitation in PA, and 5) don't already use the COPD Web. In the case of exacerbation, the participant has to wait six weeks from the start of pharmacological treatment, before being eligible to the study.

### Participant timeline

The recruitment begins at included PHC units. To facilitate the recruitment of participants, the number of included units will not be restricted to nor the units size, location, how they are funded or the type of care and rehabilitation that the unit offers. Written consent from the operational manager has to be fulfilled before recruitment can start.

To increase the possibility of recruiting participants, the number of exclusion criteria are kept to a minimum. The recruitment will take place during the participant's regular visits to the PHC unit where healthcare professionals will give information about the study. People with COPD interested in participation will have their contact information and results from latest pulmonary function test (if older than six months, a new pulmonary function test will be performed) sent to the research group as displayed in table 1. A researcher (TS) will after verbal agreement send informed consent form, questionnaires and activity monitor for baseline assessment to the participants' homes. When the written informed consent and the baseline assessment is fulfilled, the participants' are included and randomised to either the control or intervention group. Follow-up measurements with questionnaires and activity monitor will be conducted at 3 and 12 months after inclusion. A semi-



1  
2  
3 structured interview will be done after the 3 months follow-up among a convenient sample of the  
4 intervention group.  
5

6  
7 The participants will be contacted by phone before every assessment to ensure a suitable date for  
8 the activity monitoring. In case of non-response after any evaluation the participant will be reminded  
9 by phone or/and email weekly. These precautions will be made to maintain the participant in the  
10 study and increase the number of complete follow-ups.  
11  
12  
13

## 14 **Intervention**

15  
16 The COPD Web consists of several sections of which one is targeting people with COPD, shown in  
17 figure 1. The section targeting people with COPD aims to support self-management and includes, in  
18 addition to texts, pictures, and films also interactive components, e.g. registration of PA with person-  
19 tailored, automatised feedback. Automatised feedback in combination with step counting has been  
20 found useful to increase PA in people with COPD.<sup>29</sup> On the website, people with COPD can gain  
21 know-how about, e.g. PA, physical training, breathing techniques, exacerbation symptoms, advice on  
22 when to contact healthcare, and how to make everyday activities less strenuous. The content refers  
23 to, and aligns with the guidelines for COPD care developed and published by the National Board of  
24 Health and Welfare in Sweden.<sup>13</sup>  
25  
26  
27  
28  
29  
30  
31

32 Figure 1. A website map of the COPD Web showing the section “I have COPD”.  
33  
34

## 35 **The intervention group**

36 Participants randomised to the intervention group will be introduced to the COPD web by a letter  
37 containing written information, the password to get access to the website and information on how to  
38 create an account. To secure standardised instructions there will be an instruction movie available on  
39 the website, (Box 1).  
40  
41  
42

43 Box 1. The content of the movie, presenting the administration of the COPD Web  
44

- |                                                                                                                                                                                                                                                                                                                                                                                                                                                                                                                                                                                                                                                                                                                                                      |
|------------------------------------------------------------------------------------------------------------------------------------------------------------------------------------------------------------------------------------------------------------------------------------------------------------------------------------------------------------------------------------------------------------------------------------------------------------------------------------------------------------------------------------------------------------------------------------------------------------------------------------------------------------------------------------------------------------------------------------------------------|
| <ol style="list-style-type: none"><li>45 1) Introduction of the website structure, the content in the main headings and functions of the<br/>46 website, e.g., how to enlarge or shrink the text, listen to the text, and bookmark information<br/>47 of particular interest.</li><li>48 2) Introduction to the section “Physical activity.” Information about the importance of PA, and<br/>49 demonstration of the page for registration of PA (steps) with automated feedback.</li><li>50 3) Information on how to set an initial weekly step goal and instructions to insert the weekly<br/>51 step-count onto the page for registration of PA at the end of each week.<br/>52<br/>53<br/>54<br/>55<br/>56<br/>57<br/>58<br/>59<br/>60</li></ol> |
|------------------------------------------------------------------------------------------------------------------------------------------------------------------------------------------------------------------------------------------------------------------------------------------------------------------------------------------------------------------------------------------------------------------------------------------------------------------------------------------------------------------------------------------------------------------------------------------------------------------------------------------------------------------------------------------------------------------------------------------------------|

1  
2  
3 The COPD Web will be self-managed. To reduce user problems, one of the researchers (TS) will  
4 contact each participant in the first week of intervention. To test the participants' interest for and  
5 acceptability of the function of registering PA (steps) on the website, the participants will receive a  
6 pedometer with instructions on how it is used.  
7  
8  
9

10 Throughout the intervention, participants will receive prompts via email and SMS (figure 2). The  
11 prompts will include targeted information, referral links to the COPD Web and a reminder to register  
12 counted steps to improve adherence to the intervention. Prompts has shown enhanced effectiveness  
13 on limited contact interventions targeting health behaviors including PA<sup>30</sup> and proved to be useful  
14 also on people with COPD<sup>29</sup> though there is no consensus regarding the number and frequency of  
15 prompts. Frequently delivered prompts have been recommended however too excessive appearance  
16 may decrease the desired response.<sup>31</sup> Consequently, the frequency of the prompts will be each week  
17 at the beginning of the intervention and decrease to biweekly (week 13 to 24) and every fourth week  
18 (week 25 to 52). In total, we will deliver 24 different prompts with predetermined content and order  
19 to each participant.  
20  
21  
22  
23  
24  
25  
26  
27

28 Figure 2. Distribution of prompts (SMS and email) to participants in the intervention group  
29  
30  
31

### 32 **The control group**

33 The control group will, similar to the intervention group, receive a pedometer with instructions, as  
34 well as a leaflet about the importance of PA in addition to usual care. In Sweden, the majority of all  
35 people with COPD are treated within PHC.<sup>13 15</sup> Usual care within PHC are recommended to include,  
36 but are not restricted to, use of long-acting anticholinergics and long-acting  $\beta$ 2-agonists with 24 h  
37 duration and support for; smoking cessation, PA and exercise, self-management and nutrition.<sup>13</sup> All  
38 participants are permitted to start COPD rehabilitation or other interventions if offered at their PHC  
39 unit.  
40  
41  
42  
43  
44  
45  
46

### 47 **Outcomes and evaluation**

48 Various methods for data collection including questionnaires, accelerometer, data from medical  
49 records (participant's latest pulmonary function test), qualitative interviews, and user data from the  
50 COPD Web will be used. Table 2 provides an overview of methods for data collection in this study.  
51  
52  
53

### 54 **Primary outcome measures**

55 The primary outcome of the effect of the COPD Web is the difference in level of PA between  
56 intervention and control groups at follow-ups (3 and 12 months). Level of PA will be objectively  
57 measured seven consecutive days using an accelerometer (DynaPort®, McRoberts BV, the  
58  
59  
60

1  
2  
3 Netherlands) and subjectively measured with indicator questions on PA from the National Board of  
4 Health and Welfare in Sweden.<sup>32 33</sup> Weekends and weekdays with less than eight hours of wearing  
5 time of the accelerometer and measurements with less than four valid days of measurements will be  
6 excluded.<sup>34</sup> The Dynaport accelerometer has been found valid and reliable when used in people with  
7 COPD.<sup>34 35</sup>

### 11 12 **Secondary outcome measures**

13  
14 The secondary outcomes of the effect of the COPD Web are the differences between the  
15 intervention and control groups at the follow-ups at 3 and 12 months regarding participants'  
16 dyspnea; modified Medical Research Council dyspnea scale (mMRC)<sup>36</sup>, HRQoL; Chronic Respiratory  
17 Questionnaire, self-administered (CRQ-SA)<sup>37</sup>, and COPD-related symptoms; COPD Assessment Test  
18 (CAT).<sup>38</sup> Evaluation of health economics will be done using EQ-5D<sup>39</sup> to estimate quality-adjusted life  
19 (QALY) gained, commonly used in economic evaluation.<sup>40</sup> In addition, the number of participant self-  
20 reported COPD-related healthcare contacts will be evaluated where a reduction in health  
21 consumption indicates a reduced economic burden. Secondary outcomes were chosen according to  
22 results in the pilot study and since they cover specific aspects of the content of the COPD Web. Most  
23 of them have previously been used in COPD and in a Swedish context.

### 31 32 **User experience and implementation evaluation**

33  
34 For user experience evaluation, data will be collected after 3 months using semi-structured individual  
35 interviews in a subgroup of participants randomised to intervention. The participants will be asked to  
36 take part in an interview at 3 months follow-up. The interviews will include questions regarding  
37 unexpected events or consequences of receiving the COPD Web, their use of the website, and how  
38 this use has influenced their PA behavior. Study-specific documentation and automatised data on the  
39 participants' use of the COPD Web will be collected automatically from the website, e.g., number of  
40 visits, pages was used and time spent on the website. This will ad valuable information to the  
41 exeperience valuation but also make it possible to evaluate the fidelity to the intervention. In order to  
42 evaluate the implemtention and who is reached and not reached study-specific documentation  
43 including the number of participants who decline to take part in the intervention or drop outs will be  
44 noted. In addition, when appropriate, will the reasons to decline also be noted. All participants will  
45 also with the questionnaires answer study-specific questions regarding other ongoing or started  
46 interventions, hospitalisations or exacerbations that could affect the results.

Table 2 Methods for data collection

**Physical objectively measured physical activity (PA) level**

- Accelerometer (DynaPort, McRoberts BV (DynaPort®, McRoberts BV, The Netherlands) placed on the lower back 24 hours a day over seven consecutive days.<sup>34 35</sup>
  - The quantity of PA will be assessed using the mean number of steps per day and the number of days per week that the participant could be considered physically active. Physically active is operationally defined as  $\geq 5000$  steps per day.
  - The Dynaport accelerometer has been found valid and reliable when used in people with COPD.<sup>34 35</sup>

**Physical subjectively assessed PA level**

- Questionnaire from the National Board of Health and Welfare.<sup>33</sup>
  - The time spent in physical activities such as taking a walk or working in the garden during last week is rated by choosing between pre-specified options (no time at all/30–60 min/60–90 min/9–120 min/>120 min).
  - The time spent in physical exercises such as running or doing exercise to keep fit during last week is rated by choosing between pre-specified options (no time at all/30–60 min/60–90 min/9–120 min/>120 min).
  - The categorical mode of the scale has shown low-to-moderate associations with objectively measured PA level, maximal oxygen uptake, physical performance, balance, cardiovascular biomarkers and self-rated health.<sup>32</sup>

**Health-related quality of life (HRQoL)**

- CRQ-SA The Swedish version of the self-administrated Chronic Respiratory Questionnaire.<sup>37</sup>
  - CRQ-SA aims to measure HRQoL in people with chronic respiratory distress. The questionnaire consists of 20 questions divided into four areas (dyspnea, fatigue, emotional function, and control) that are rated on a 7-graded Likert scale. The questions include, for example, "How often in the last two weeks have you known that you had complete control over your breathing problems?" and "In the last two weeks, how often have you known that you had low energy?".<sup>37</sup>
  - CRQ-SA has shown strong responsiveness to changes in HRQoL for people with COPD.<sup>41</sup>

**COPD-related symptoms**

- The questionnaire COPD Assessment Test (CAT).<sup>38</sup>
  - The severity of eight COPD-related symptoms (coughing, the presence of phlegm, feeling of tightness in the chest, breathlessness when walking, limitation in activities, confidence in leaving home, sleep, and energy) is rated on a six-grade scale.
  - Evaluated for internal consistency, stability over time in stable patients and ability to discriminate between stable and exacerbation patients with excellent or very good results.<sup>38</sup>

**Dyspnea**

- The questionnaire modified Medical Research Council Dyspnea Scale (mMRC).<sup>36</sup>
  - Perceived dyspnea is rated on a 5-graded Likert scale ranging from 0 ("I just get out of breath when I exert myself greatly" to 4 ("I get out of breath when I wash or get dressed").
  - Evaluated for categorising people with COPD in terms of disability with good results.<sup>42</sup>

**Health economics**

- Self-reported healthcare contacts related to COPD
- The questionnaire EuroQol five dimensions questionnaire(EQ-5D).<sup>39</sup>
  - Health status is rated on five items; three items relate to problems in mobility, self-care, and usual activities and two items cover the presence and severity of pain and anxiety/depression. Each item is rated on a three-grade scale corresponding to no problem/some or moderate problems/extreme problems.

- General health is rated on a scale ranging from 0 (worst imaginable health state) to 100 (best possible health state).
- Evaluation of health economy will be done using EQ-5D to estimate quality-adjusted life (QALY) gained.<sup>40</sup> Also, the number of COPD-related health contacts and hospitalisation that occurs during the intervention will be followed and cost estimated.
- EQ-5D can discriminate between groups of people with different severity of COPD.<sup>43</sup>

### Implementation

- Implementation of the COPD Web.
  - Semi-structured interviews will be performed according to a pre-specified interview guide and user statistics from the website will be analysed.
- Fidelity to the intervention.
  - Semi-structured interviews will be performed according to a pre-specified interview guide.
- Reach.
  - Study-specific documentation including the number of participants who decline to take part in the intervention will be analysed. When appropriate, the reasons to decline will be noted.
- Enablers and barriers for the use of web-based support like the COPD Web
  - Semi-structured interviews will be performed according to a pre-specified interview guide and analysed.

---

COPD, chronic obstructive pulmonary disease.

## Data collection, management, and analysis

### Sample size calculation

The sample size was calculated with the premises that a total of 144 participants with COPD would be required to detect a mean difference of 1131 steps with a standard deviation of 2193 steps<sup>44</sup>,  $\alpha = 0.05$ ,  $\beta = 0.20$  (80% power), and a two-tailed test of significance including an estimated dropout rate of 20%.<sup>29</sup> Approximately 10-15 participants will be recruited to individual interviews to have various experiences represented. A wide distribution of age, disease severity and an equal number of women and men will be strived for.

### Randomisation and masking

A permuted block design with a random block size varying from 4 to 8 in a 1:1 allocation ratio will be computer generated to randomise participants. This approach is chosen to achieve balanced and evenly distributed samples. A third party, not involved in data collection or analysis of the results, will perform the randomisation and the result will be stored in sealed envelopes. Thus, the randomisation will be revealed for the researcher when the baseline registration and written informed consent are fulfilled, and the sealed envelope next in order is opened. The researcher then will send a letter containing the result of group allocation, a pedometer, a pamphlet about PA and information about when the participant will be contacted again. The members of the intervention group will, in addition, receive the material and information on how to start using the COPD Web.

1  
2  
3 Due to the character of the intervention, blinding of trial participants will not be applicable.  
4 Furthermore, as all data are self-reported, neither is blinding of outcome assessors applicable.  
5  
6

### 7 **Data management and monitoring**

8  
9 To ensure confidentiality, participants with COPD will get a unique identification (ID) when included  
10 in the study. The code list linking participants and ID number will be kept separate from the data.  
11  
12 Data will be analysed by ID only. All records that contain names or other personal identifiers, such as  
13 locator forms and informed consent forms, will be stored separately from study records identified by  
14 the ID number. The local database will be secured with a password-protected access system. All data  
15 will be coded and reported on group level. Thus it will not be possible to identify specific participants  
16 in the trial. We will use two-pass verification to ensure correct data entry. No interim analyses or  
17 stopping guidelines are pre-specified. Only the researchers will have access to the final trial dataset.  
18  
19  
20  
21  
22

### 23 **Statistics and qualitative analysis**

24  
25 The primary analysis will be an intention-to-treat analysis (including all participants randomised). In  
26 addition, a complete case population (participants with full outcome measurements independent on  
27 adherence to intervention), and a per-protocol analysis (defined as at least one login besides creating  
28 an account on the COPD Web or answering that the SMS and email with referral links have been used  
29 at least rarely (1-3 times) at the follow-ups) will be performed. Missing data will be imputed in the  
30 intention-to-treat analysis using multiple imputation assuming data is missing at random conditional  
31 on participants' severity of disease and self-reported history of exacerbations. This is because  
32 severity of disease and history of exacerbations are known risk factors for future exacerbations and  
33 may affect adherence to PA interventions.<sup>45</sup>  
34  
35  
36  
37  
38  
39

40  
41 The difference in primary outcome between intervention and control group will be estimated using  
42 multilevel mixed effects models with subjects at level 1 and PHC units at level 2. PHC units and  
43 subjects will be modelled as random effects while group (intervention group vs control group), time  
44 and group\*time interaction as fixed effects. Estimates of effect sizes will be computed using Cohen's  
45  $d$  ( $d = \text{difference in group means/error SD within}$ ). Calculated as the difference between predicted  
46 means from the final mixed-effects model for a given pair of groups divided by the estimated within-  
47 group error SD in the model with the estimated value of  $2\sigma_e^2$ , where  $\sigma_e^2$  is the residual variance. To  
48 judge the quality of the model we, will analyse the residuals. No sub-group or adjusted analyses  
49 other than the pre-specified complete case and per-protocol analysis will be performed.  
50  
51  
52  
53  
54  
55

56  
57 The individual interviews will be analysed using qualitative content analysis according to the  
58 procedures presented by Graneheim.<sup>46</sup> The interviews transcriptions will be read, coded and  
59 categorised by one researcher. Two other researchers will also read and code independently for  
60

1  
2  
3 triangulation. Organisation and labeling of categories will be discussed and modified throughout the  
4 process.  
5

### 6 7 **Amendments**

8  
9 Any modifications to the protocol that may influence the conduct of the study, the potential benefit  
10 of the participant or may affect participant safety, including changes of study objectives, study  
11 design, population, sample sizes, study procedures or significant administrative aspects will require a  
12 formal amendment to the protocol. Such modifications will be agreed upon by the research group  
13 with the final decision by the principal investigator, and if needed to be approved by the local ethic  
14 committees.  
15  
16  
17  
18

19 Administrative changes of the protocol (e.g., minor corrections and clarifications) that do not  
20 influence how the study is conducted will be agreed upon by the research group with the final  
21 decision by the principal investigator and will be documented and presented upon publication.  
22  
23  
24

### 25 **Ethics approval and consent to participate**

26  
27 Ethical approval has been received from the Regional Ethical Review Board in Umeå, Sweden. Dnr  
28 2018-274-31. All participants will receive brief, comprehensible oral and written information, by the  
29 Helsinki Declaration.<sup>47</sup> A first informed consent confirms that contact information and latest  
30 pulmonary function test from the potential participant can be collected by healthcare professionals  
31 and sent to the researchers. The participant will, together with the baseline assessment, send a  
32 second and final informed consent to the researcher. The informed consent from operational  
33 managers will be sent and stored at the Regional Ethical Review Board in Umeå, Sweden.  
34  
35  
36  
37  
38  
39

### 40 **Dissemination**

41 The results of this study will be submitted for publication in peer-reviewed journals and presented at  
42 conferences both nationally and internationally as well as to included healthcare professionals,  
43 participants, and patient organisations for people with COPD.  
44  
45  
46

### 47 **Trial registration**

48  
49 Registration of the clinical trial before the enrolment of the first participant was performed. Date of  
50 trial initial release 2018-11-15 and published 2018-12-20. ClinicalTrials.gov identifier: NCT03746873.  
51 The recruitment began 2018-11-15 and will continue until sufficient power is reached.  
52  
53  
54  
55  
56  
57  
58  
59  
60

## Discussion

This study protocol presents a pragmatic randomised controlled trial with pre- and post-assessments aimed at evaluating the effect of the use of the COPD Web for people with COPD in a PHC context. The study also intends to evaluate implementation and to identify enablers and barriers to use of web-based support to change behavior among people with COPD. Currently, despite its proven effectiveness, access to self-management interventions is limited<sup>2 14</sup>, and alternative ways of promoting self-management for people with COPD are warranted. A recent pilot trial has shown that giving people with COPD access to the COPD Web may be an effective short-term strategy to promote self-management that increase levels of PA, promote conceptual knowledge and alter disease management strategies.<sup>24</sup> However, these results need to be confirmed in a definitive large-scale randomised trial including both short- and long-term evaluation.

This proposed trial will provide new knowledge to this research area by evaluating the effect of the use of web-based support for increasing access to self-management strategies for people with COPD and determine its effect on clinically relevant outcomes. This trial will include short- (3 months) and long-term perspectives (12 months) with objectively measured PA in addition to the self-reported PA that will contribute with more knowledge regarding the effect of having access to the COPD Web. PA is of utmost importance, as the level of PA is one of the strongest predictors of mortality among people with COPD.<sup>11 12</sup>

A user experience and implementation evaluation of the intervention will provide novel information and understanding about enablers and barriers for the use of web-based support to change behavior. This information will increase knowledge of how the process of receiving the intervention can be interpreted. It will also help us draw a better conclusions regarding acceptance, fidelity and implementation of the COPD Web.

Guided by the pilot study, prompts will be used to encourage the use of the website during the intervention period.<sup>24</sup> The reminders will provide information with referral links that will appear in a predefined way. Prompts have been proven effective in other setups but there is no consensus regarding the number of prompts or frequency, especially in a longer perspective.<sup>31</sup> The effect of the prompts will be qualitatively evaluated through the semi-structured interviews. The evaluation will answer how the prompts were perceived and if they induced more frequent use and/or changed behaviour regarding PA among the participants. The use of the COPD Web will be automatically registered through the whole intervention since the participants need to log in to access the website. That measure makes it possible to analyse the fidelity to the intervention and answer if there is an



1  
2  
3 association between the use of the COPD Web, e.g., time and number of visits and any possible  
4 effect.  
5

6  
7 As the study is designed as a pragmatic trial<sup>25</sup>, the intervention will be self-managed and distance-  
8 based to maximise the clinical applicability of the findings. One concern is that there might be  
9 participants who do not manage the instructions to create their account and learn how to use the  
10 website. However, they will be contacted at the beginning of the intervention to reduce user  
11 problems. The pragmatic approach also means that there is no selection on the number, size or  
12 location of the recruiting PHC units. Also, the inclusion criteria are set wide with a minimised  
13 selection beyond diagnosed COPD that could enhance the recruitment rates and finally increase the  
14 clinical applicability of the findings within PHC. One limitation is that the sample size, calculated on  
15 PA, will be large enough for evaluation of the PA but may not be powered enough for all secondary  
16 outcome or sub-group analyses. The latter much depending on the severity of symptoms among the  
17 participants.  
18

19 In conclusion, this pragmatic randomised trial will provide clinically relevant information on the  
20 effect of the use of the COPD Web in people with COPD in a PHC context regarding level of PA,  
21 dyspnea, HRQoL, COPD-related symptoms and health economics in relation to healthcare use, as well  
22 as barriers and enablers for using web-based support with solutions such as the COPD Web.  
23  
24  
25

### 26 27 28 29 30 31 32 33 34 35 36 37 **Ethics approval and consent to participate**

38  
39 Regional Ethical Review Board in Umeå, Sweden.  
40

### 41 42 **Availability of data and materials**

43  
44 Not applicable.  
45

### 46 47 **Consent for publication**

48  
49 Not applicable.  
50

### 51 52 **Competing interests**

53  
54 AN reports lecture fees from AstraZeneca.  
55

### 56 57 **Author Contributions**

58  
59 TS has made direct and substantial contribution to this work by contributing to the conception and  
60 design of the study, designing and writing of the protocol. AN has made direct and substantial

1  
2  
3 contribution to this work by contributing to the conception and design of the study, sample size  
4 calculation and choice of statistics, designing and writing of the protocol. SL has made direct and  
5 substantial contribution to this work in providing critical revisions that are important for the  
6 intellectual content of the protocol. KW is the principal investigator and has made direct and  
7 substantial contribution to this work by providing the project idea, contributing to the conception  
8 and design of the study and by providing critical revisions that are important for the intellectual  
9 content of the protocol. All authors have approved the final version of the protocol.  
10  
11  
12  
13  
14

## 15 **Acknowledgement**

16  
17  
18 Not applicable  
19

## 20 **Funding**

21  
22 This work was supported by The Swedish Research Council, grant number 521-2013-3503 and the  
23 Strategic Research Area – Care Science, Umeå University, Sweden, no grant number available.  
24  
25  
26  
27  
28

## 29 **References**

- 30  
31  
32 1. World Health Organization. The top 10 causes of death.:  
33 <http://www.who.int/mediacentre/factsheets/fs310/en/>; [accessed 2019-03-19].  
34 2. Jansson SA, Backman H, Stenling A, et al. Health economic costs of COPD in Sweden by disease  
35 severity - Has it changed during a ten years period? *Respir Med* 2013 doi:  
36 10.1016/j.rmed.2013.07.012  
37 3. Jansson SA, Backman H, Ronmark E, et al. Hospitalization Due to Co-Morbid Conditions is the Main  
38 Cost Driver Among Subjects With COPD-A Report From the Population-Based OLIN COPD  
39 Study. *Copd* 2015;12(4):381-9. doi: 10.3109/15412555.2014.974089 [published Online First:  
40 2014/11/22]  
41 4. Vogelmeier CF, Criner GJ, Martinez FJ, et al. Global Strategy for the Diagnosis, Management, and  
42 Prevention of Chronic Obstructive Lung Disease 2017 Report. GOLD Executive Summary. *Am J*  
43 *Respir Crit Care Med* 2017;195(5):557-82. doi: 10.1164/rccm.201701-0218PP [published  
44 Online First: 2017/01/28]  
45 5. Spruit MA, Singh SJ, Garvey C, et al. An official American Thoracic Society/European Respiratory  
46 Society statement: key concepts and advances in pulmonary rehabilitation. *Am J Respir Crit*  
47 *Care Med* 2013;188(8):e13-64. doi: 10.1164/rccm.201309-1634ST [published Online First:  
48 2013/10/17]  
49 6. Effing TW, Bourbeau J, Vercoulen J, et al. Self-management programmes for COPD: moving  
50 forward. *Chronic respiratory disease* 2012;9(1):27-35. doi: 10.1177/1479972311433574  
51 7. Apps LD, Mitchell KE, Harrison SL, et al. The development and pilot testing of the self-management  
52 programme of activity, coping and education for chronic obstructive pulmonary disease  
53 (SPACE for COPD). *International journal of chronic obstructive pulmonary disease* 2013;8:317-  
54 27. doi: 10.2147/COPD.S40414  
55 8. Velloso M, Jardim JR. Study of energy expenditure during activities of daily living using and not  
56 using body position recommended by energy conservation techniques in patients with COPD.  
57 *Chest* 2006;130(1):126-32. doi: 10.1378/chest.130.1.126  
58  
59  
60

- 1
  - 2
  - 3
  - 4
  - 5
  - 6
  - 7
  - 8
  - 9
  - 10
  - 11
  - 12
  - 13
  - 14
  - 15
  - 16
  - 17
  - 18
  - 19
  - 20
  - 21
  - 22
  - 23
  - 24
  - 25
  - 26
  - 27
  - 28
  - 29
  - 30
  - 31
  - 32
  - 33
  - 34
  - 35
  - 36
  - 37
  - 38
  - 39
  - 40
  - 41
  - 42
  - 43
  - 44
  - 45
  - 46
  - 47
  - 48
  - 49
  - 50
  - 51
  - 52
  - 53
  - 54
  - 55
  - 56
  - 57
  - 58
  - 59
  - 60
9. Garcia-Aymerich J, Pitta F. Promoting Regular Physical Activity in Pulmonary Rehabilitation. *Clinics in Chest Medicine* 2014;35(2):363-68. doi: 10.1016/j.ccm.2014.02.011
10. Troosters T, Sciurba F, Battaglia S, et al. Physical inactivity in patients with COPD, a controlled multi-center pilot-study. *Respir Med* 2010;104(7):1005-11. doi: 10.1016/j.rmed.2010.01.012 [published Online First: 2010/02/20]
11. Waschki B, Kirsten A, Holz O, et al. Physical activity is the strongest predictor of all-cause mortality in patients with COPD: a prospective cohort study. *Chest* 2011;140(2):331-42. doi: 10.1378/chest.10-2521 [published Online First: 2011/01/29]
12. Gimeno-Santos E, Frei A, Steurer-Stey C, et al. Determinants and outcomes of physical activity in patients with COPD: a systematic review. *Thorax* 2014;69(8):731-9. doi: 10.1136/thoraxjnl-2013-204763
13. Socialstyrelsen [The National Board of Health and Welfare]. Nationella riktlinjer för vård vid astma och KOL 2018. [National guidelines for asthma and COPD care] [accessed March 13, 2019].
14. Wadell K, Janaudis Ferreira T, Arne M, et al. Hospital-based pulmonary rehabilitation in patients with COPD in Sweden-A national survey. *Respir Med* 2013;107(8):1195-200. doi: 10.1016/j.rmed.2013.04.019
15. Sundh J, Lindgren H, Hasselgren M, et al. Pulmonary rehabilitation in COPD - available resources and utilization in Swedish primary and secondary care. *International journal of chronic obstructive pulmonary disease* 2017;12:1695-704. doi: 10.2147/copd.s135111 [published Online First: 2017/06/28]
16. Lundell S, Holmner A, Rehn B, et al. Telehealthcare in COPD: A systematic review and meta-analysis on physical outcomes and dyspnea. *Respir Med* 2015;109(1):11-26. doi: 10.1016/j.rmed.2014.10.008
17. Loeckx M, Rabinovich RA, Demeyer H, et al. Smartphone-Based Physical Activity Telecoaching in Chronic Obstructive Pulmonary Disease: Mixed-Methods Study on Patient Experiences and Lessons for Implementation. *JMIR mHealth and uHealth* 2018;6(12):e200. doi: 10.2196/mhealth.9774
18. Adams SG, Smith PK, Allan PF, et al. Systematic review of the chronic care model in chronic obstructive pulmonary disease prevention and management. *Archives of internal medicine* 2007;167(6):551-61. doi: 10.1001/archinte.167.6.551
19. Moy ML, Collins RJ, Martinez CH, et al. An Internet-Mediated Pedometer-Based Program Improves Health-Related Quality-of-Life Domains and Daily Step Counts in COPD: A Randomized Controlled Trial. *Chest* 2015;148(1):128-37. doi: 10.1378/chest.14-1466 [published Online First: 2015/03/27]
20. Wan ES, Kantorowski A, Homsy D, et al. Promoting physical activity in COPD: Insights from a randomized trial of a web-based intervention and pedometer use. *Respir Med* 2017;130:102-10. doi: 10.1016/j.rmed.2017.07.057 [published Online First: 2017/12/06]
21. McCabe C, McCann M, Brady AM. Computer and mobile technology interventions for self-management in chronic obstructive pulmonary disease. *Cochrane Database of Systematic Reviews* 2017(5) doi: 10.1002/14651858.CD011425.pub2
22. Tistad M, Lundell S, Wiklund M, et al. Usefulness and Relevance of an eHealth Tool in Supporting the Self-Management of Chronic Obstructive Pulmonary Disease: Explorative Qualitative Study of a Cocreative Process. *JMIR Hum Factors* 2018;5(4):e10801. doi: 10.2196/10801 [published Online First: 2018/10/29]
23. Nyberg A, Wadell K, Lindgren H, et al. Internet-based support for self-management strategies for people with COPD-protocol for a controlled pragmatic pilot trial of effectiveness and a process evaluation in primary healthcare. *BMJ open* 2017;7(7):e016851. doi: 10.1136/bmjopen-2017-016851 [published Online First: 2017/08/03]
24. Nyberg A, Tistad M, Wadell K. Can the COPD web be used to promote self-management in patients with COPD in swedish primary care: a controlled pragmatic pilot trial with 3 month-

- and 12 month follow-up. *Scandinavian journal of primary health care* 2019;1-14. doi: 10.1080/02813432.2019.1569415 [published Online First: 2019/02/01]
25. Zwarenstein M, Treweek S, Gagnier JJ, et al. Improving the reporting of pragmatic trials: an extension of the CONSORT statement. *BMJ (Clinical research ed)* 2008;337:a2390. doi: 10.1136/bmj.a2390 [published Online First: 2008/11/13]
26. Chan A-W, Tetzlaff JM, Altman DG, et al. SPIRIT 2013 Statement: Defining Standard Protocol Items for Clinical Trials. *Annals of Internal Medicine* 2013;158(3):200-07. doi: 10.7326/0003-4819-158-3-201302050-00583
27. Chan AW, Tetzlaff JM, Gotzsche PC, et al. SPIRIT 2013 explanation and elaboration: guidance for protocols of clinical trials. *BMJ (Clinical research ed)* 2013;346:e7586. doi: 10.1136/bmj.e7586 [published Online First: 2013/01/11]
28. Eysenbach G. CONSORT-EHEALTH: Improving and Standardizing Evaluation Reports of Web-based and Mobile Health Interventions. *J Med Internet Res* 2011;13(4):e126. doi: 10.2196/jmir.1923 [published Online First: 31.12.2011]
29. Demeyer H, Louvaris Z, Frei A, et al. Physical activity is increased by a 12-week semiautomated telecoaching programme in patients with COPD: a multicentre randomised controlled trial. *Thorax* 2017;72(5):415-23. doi: 10.1136/thoraxjnl-2016-209026
30. Fry JP, Neff RA. Periodic Prompts and Reminders in Health Promotion and Health Behavior Interventions: Systematic Review. *J Med Internet Res* 2009;11(2):e16. doi: 10.2196/jmir.1138 [published Online First: 14.5.2009]
31. Muench F, Baumel A. More Than a Text Message: Dismantling Digital Triggers to Curate Behavior Change in Patient-Centered Health Interventions. *J Med Internet Res* 2017;19(5):e147. doi: 10.2196/jmir.7463 [published Online First: 2017/05/28]
32. Olsson SJG, Ekblom Ö, Andersson E, et al. Categorical answer modes provide superior validity to open answers when asking for level of physical activity: A cross-sectional study. *Scandinavian Journal of Public Health* 2016;44(1):70-76. doi: 10.1177/1403494815602830
33. Socialstyrelsen [The National Board of Health and Welfare]. Nationella riktlinjer för sjukdomsförebyggande metoder 2011 Tobaksbruk, riskbruk av alkohol, otillräcklig fysisk aktivitet och ohälsosamma matvanor Stöd för styrning och ledning [Disease Prevention in the Swedish Healthcare System: Health situation, national guidelines and implementation]. (In Swedish with an English summary). Västerås, Sweden: Socialstyrelsen, 2011. .
34. Demeyer H, Burtin C, Van Remoortel H, et al. Standardizing the analysis of physical activity in patients with COPD following a pulmonary rehabilitation program. *Chest* 2014;146(2):318-27. doi: 10.1378/chest.13-1968 [published Online First: 2014/03/08]
35. Andersson M, Janson C, Emtner M. Accuracy of three activity monitors in patients with chronic obstructive pulmonary disease: a comparison with video recordings. *Copd* 2014;11(5):560-7. doi: 10.3109/15412555.2014.898033 [published Online First: 2014/04/17]
36. Mahler DA, Wells CK. Evaluation of clinical methods for rating dyspnea. *Chest* 1988;93(3):580-6. [published Online First: 1988/03/01]
37. Vernooij RW, Willson M, Gagliardi AR. Characterizing patient-oriented tools that could be packaged with guidelines to promote self-management and guideline adoption: a meta-review. *Implementation science : IS* 2016;11:52. doi: 10.1186/s13012-016-0419-1 [published Online First: 2016/04/16]
38. Jones PW, Harding G, Berry P, et al. Development and first validation of the COPD Assessment Test. *The European respiratory journal* 2009;34(3):648-54. doi: 10.1183/09031936.00102509 [published Online First: 2009/09/02]
39. Dolan P. Modeling valuations for EuroQol health states. *Medical care* 1997;35(11):1095-108. [published Online First: 1997/11/21]
40. Manca A, Hawkins N, Sculpher MJ. Estimating mean QALYs in trial-based cost-effectiveness analysis: the importance of controlling for baseline utility. *Health Economics* 2005;14(5):487-96. doi: 10.1002/hec.944

- 1  
2  
3 41. Puhan MA, Guyatt GH, Goldstein R, et al. Relative responsiveness of the Chronic Respiratory  
4 Questionnaire, St. Georges Respiratory Questionnaire and four other health-related quality  
5 of life instruments for patients with chronic lung disease. *Respiratory Medicine*  
6 2007;101(2):308-16. doi: <https://doi.org/10.1016/j.rmed.2006.04.023>  
7  
8 42. Bestall JC, Paul EA, Garrod R, et al. Usefulness of the Medical Research Council (MRC) dyspnoea  
9 scale as a measure of disability in patients with chronic obstructive pulmonary disease.  
10 *Thorax* 1999;54(7):581-6. [published Online First: 1999/06/22]  
11  
12 43. Rutten-van Molken MP, Oostenbrink JB, Tashkin DP, et al. Does quality of life of COPD patients as  
13 measured by the generic EuroQol five-dimension questionnaire differentiate between COPD  
14 severity stages? *Chest* 2006;130(4):1117-28. doi: 10.1378/chest.130.4.1117 [published  
15 Online First: 2006/10/13]  
16  
17 44. Demeyer H, Burtin C, Hornikx M, et al. The Minimal Important Difference in Physical Activity in  
18 Patients with COPD. *PLOS ONE* 2016;11(4):e0154587. doi: 10.1371/journal.pone.0154587  
19  
20 45. Müllerová H, Shukla A, Hawkins A, et al. Risk factors for acute exacerbations of COPD in a primary  
21 care population: a retrospective observational cohort study. *BMJ open* 2014;4(12):e006171.  
22 doi: 10.1136/bmjopen-2014-006171  
23  
24 46. Graneheim UH, Lundman B. Qualitative content analysis in nursing research: concepts,  
25 procedures and measures to achieve trustworthiness. *Nurse education today*  
26 2004;24(2):105-12. doi: 10.1016/j.nedt.2003.10.001 [published Online First: 2004/02/11]  
27  
28 47. World Medical A. World medical association declaration of helsinki: Ethical principles for medical  
29 research involving human subjects. *JAMA* 2013;310(20):2191-94. doi:  
30 10.1001/jama.2013.281053  
31  
32  
33  
34  
35  
36  
37  
38  
39  
40  
41  
42  
43  
44  
45  
46  
47  
48  
49  
50  
51  
52  
53  
54  
55  
56  
57  
58  
59  
60

Table 1. Participant timeline for enrolment, the intervention and assessments

| Timepoint                                                              | t <sup>-1</sup> screening/consent | t <sup>0</sup> baseline | t <sup>1</sup> start                                                                | t <sup>2</sup> 3 months | t <sup>3</sup> (interviews) | t <sup>4</sup> 12 months |
|------------------------------------------------------------------------|-----------------------------------|-------------------------|-------------------------------------------------------------------------------------|-------------------------|-----------------------------|--------------------------|
| <b>Enrolment</b>                                                       |                                   |                         |                                                                                     |                         |                             |                          |
| Eligibility screen                                                     | x                                 |                         |                                                                                     |                         |                             |                          |
| Informed consent                                                       |                                   | x                       |                                                                                     |                         |                             |                          |
| Allocation                                                             |                                   |                         | x                                                                                   |                         |                             |                          |
| <b>Intervention</b>                                                    |                                   |                         |                                                                                     |                         |                             |                          |
| The COPD Web                                                           |                                   |                         |  |                         |                             |                          |
| <b>Assessments</b>                                                     |                                   |                         |                                                                                     |                         |                             |                          |
| Sociodemographics (age, sex, anthropometry, diagnosis) <sup>1</sup>    |                                   | x                       |                                                                                     | x                       |                             | x                        |
| Pulmonary function <sup>2</sup>                                        | x                                 |                         |                                                                                     |                         |                             |                          |
| COPD-related symptoms <sup>1</sup>                                     |                                   | x                       |                                                                                     | x                       |                             | x                        |
| Dyspnea <sup>1</sup>                                                   |                                   | x                       |                                                                                     | x                       |                             | x                        |
| Health-related quality of life (HRQoL) <sup>1</sup>                    |                                   | x                       |                                                                                     | x                       |                             | x                        |
| Time spent in physical activity and training <sup>1</sup>              |                                   | x                       |                                                                                     | x                       |                             | x                        |
| Time being sedentary <sup>1</sup>                                      |                                   | x                       |                                                                                     | x                       |                             | x                        |
| Physical activity level (accelerometer) <sup>1</sup>                   |                                   | x                       |                                                                                     | x                       |                             | x                        |
| Implementation <sup>1,3</sup>                                          |                                   |                         | x                                                                                   | x                       | x                           | x                        |
| Response to and interaction with the COPD Web <sup>1</sup>             |                                   |                         |                                                                                     | x                       | x                           | x                        |
| COPD-related health care contacts <sup>1</sup>                         |                                   |                         |                                                                                     | x                       |                             | x                        |
| Enablers and Barriers for the use of a web-based solution <sup>1</sup> |                                   |                         |                                                                                     |                         | x                           |                          |

Data collection from <sup>1</sup> People with COPD, <sup>2</sup> Medical record, <sup>3</sup> Statistics from the website

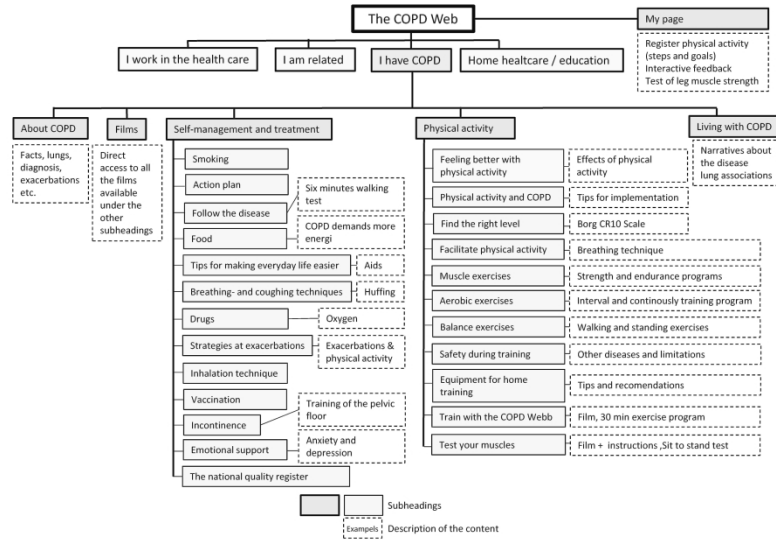

Figure 1. A website map of the COPD Web showing the section "I have COPD".

297x209mm (300 x 300 DPI)

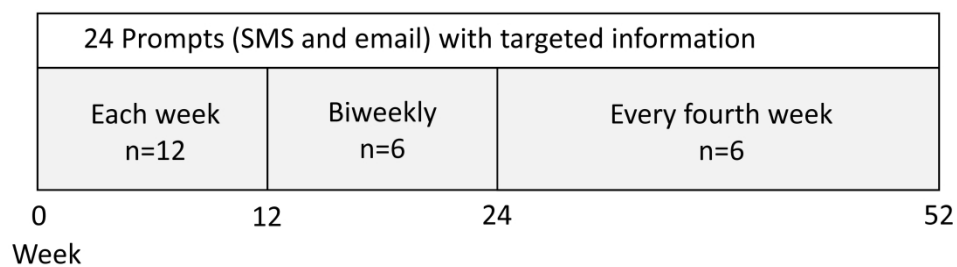

Figure 2. Distribution of prompts (SMS and email) to participants in the intervention group

183x57mm (600 x 600 DPI)



# Reporting checklist for protocol of a clinical trial.

Based on the SPIRIT guidelines.

## Instructions to authors

Complete this checklist by entering the page numbers from your manuscript where readers will find each of the items listed below.

Your article may not currently address all the items on the checklist. Please modify your text to include the missing information. If you are certain that an item does not apply, please write "n/a" and provide a short explanation.

Upload your completed checklist as an extra file when you submit to a journal.

In your methods section, say that you used the SPIRIT reporting guidelines, and cite them as:

Chan A-W, Tetzlaff JM, Altman DG, Laupacis A, Gøtzsche PC, Krleža-Jerić K, Hróbjartsson A, Mann H, Dickersin K, Berlin J, Doré C, Parulekar W, Summerskill W, Groves T, Schulz K, Sox H, Rockhold FW, Rennie D, Moher D. SPIRIT 2013 Statement: Defining standard protocol items for clinical trials. *Ann Intern Med.* 2013;158(3):200-207

|                                             |     | Reporting Item                                                                                               | Page Number |
|---------------------------------------------|-----|--------------------------------------------------------------------------------------------------------------|-------------|
| Title                                       | #1  | Descriptive title identifying the study design, population, interventions, and, if applicable, trial acronym | 1           |
| Trial registration                          | #2a | Trial identifier and registry name. If not yet registered, name of intended registry                         | 2+13        |
| Trial registration: data set                | #2b | All items from the World Health Organization Trial Registration Data Set                                     | n/a         |
| Protocol version                            | #3  | Date and version identifier                                                                                  | n/a         |
| Funding                                     | #4  | Sources and types of financial, material, and other support                                                  | 15          |
| Roles and responsibilities: contributorship | #5a | Names, affiliations, and roles of protocol contributors                                                      | 1+15-16     |

|    |                      |     |                                                             |      |
|----|----------------------|-----|-------------------------------------------------------------|------|
| 1  | Roles and            | #5b | Name and contact information for the trial sponsor          | n/a  |
| 2  | responsibilities:    |     |                                                             |      |
| 3  | sponsor contact      |     |                                                             |      |
| 4  | information          |     |                                                             |      |
| 5  |                      |     |                                                             |      |
| 6  |                      |     |                                                             |      |
| 7  |                      |     |                                                             |      |
| 8  | Roles and            | #5c | Role of study sponsor and funders, if any, in study         | 15   |
| 9  | responsibilities:    |     | design; collection, management, analysis, and               |      |
| 10 | sponsor and funder   |     | interpretation of data; writing of the report; and the      |      |
| 11 |                      |     | decision to submit the report for publication, including    |      |
| 12 |                      |     | whether they will have ultimate authority over any of       |      |
| 13 |                      |     | these activities                                            |      |
| 14 |                      |     |                                                             |      |
| 15 |                      |     |                                                             |      |
| 16 |                      |     |                                                             |      |
| 17 | Roles and            | #5d | Composition, roles, and responsibilities of the             | n/a  |
| 18 | responsibilities:    |     | coordinating centre, steering committee, endpoint           |      |
| 19 | committees           |     | adjudication committee, data management team, and           |      |
| 20 |                      |     | other individuals or groups overseeing the trial, if        |      |
| 21 |                      |     | applicable (see Item 21a for data monitoring committee)     |      |
| 22 |                      |     |                                                             |      |
| 23 |                      |     |                                                             |      |
| 24 |                      |     |                                                             |      |
| 25 |                      |     |                                                             |      |
| 26 | Background and       | #6a | Description of research question and justification for      | 4    |
| 27 | rationale            |     | undertaking the trial, including summary of relevant        |      |
| 28 |                      |     | studies (published and unpublished) examining benefits      |      |
| 29 |                      |     | and harms for each intervention                             |      |
| 30 |                      |     |                                                             |      |
| 31 |                      |     |                                                             |      |
| 32 |                      |     |                                                             |      |
| 33 | Background and       | #6b | Explanation for choice of comparators                       | 4    |
| 34 | rationale: choice of |     |                                                             |      |
| 35 | comparators          |     |                                                             |      |
| 36 |                      |     |                                                             |      |
| 37 |                      |     |                                                             |      |
| 38 | Objectives           | #7  | Specific objectives or hypotheses                           | 5    |
| 39 |                      |     |                                                             |      |
| 40 | Trial design         | #8  | Description of trial design including type of trial (eg,    | 5+11 |
| 41 |                      |     | parallel group, crossover, factorial, single group),        |      |
| 42 |                      |     | allocation ratio, and framework (eg, superiority,           |      |
| 43 |                      |     | equivalence, non-inferiority, exploratory)                  |      |
| 44 |                      |     |                                                             |      |
| 45 |                      |     |                                                             |      |
| 46 |                      |     |                                                             |      |
| 47 | Study setting        | #9  | Description of study settings (eg, community clinic,        | 6    |
| 48 |                      |     | academic hospital) and list of countries where data will be |      |
| 49 |                      |     | collected. Reference to where list of study sites can be    |      |
| 50 |                      |     | obtained                                                    |      |
| 51 |                      |     |                                                             |      |
| 52 |                      |     |                                                             |      |
| 53 |                      |     |                                                             |      |
| 54 | Eligibility criteria | #10 | Inclusion and exclusion criteria for participants. If       | 5-6  |
| 55 |                      |     | applicable, eligibility criteria for study centres and      |      |
| 56 |                      |     | individuals who will perform the interventions (eg,         |      |
| 57 |                      |     | surgeons, psychotherapists)                                 |      |
| 58 |                      |     |                                                             |      |
| 59 |                      |     |                                                             |      |
| 60 |                      |     |                                                             |      |

|    |                      |      |                                                              |        |
|----|----------------------|------|--------------------------------------------------------------|--------|
| 1  | Interventions:       | #11a | Interventions for each group with sufficient detail to allow | 7-8    |
| 2  | description          |      | replication, including how and when they will be             |        |
| 3  |                      |      | administered                                                 |        |
| 4  |                      |      |                                                              |        |
| 5  |                      |      |                                                              |        |
| 6  | Interventions:       | #11b | Criteria for discontinuing or modifying allocated            | 13     |
| 7  | modifications        |      | interventions for a given trial participant (eg, drug dose   |        |
| 8  |                      |      | change in response to harms, participant request, or         |        |
| 9  |                      |      | improving / worsening disease)                               |        |
| 10 |                      |      |                                                              |        |
| 11 |                      |      |                                                              |        |
| 12 |                      |      |                                                              |        |
| 13 | Interventions:       | #11c | Strategies to improve adherence to intervention              | 8      |
| 14 | adherence            |      | protocols, and any procedures for monitoring adherence       |        |
| 15 |                      |      | (eg, drug tablet return; laboratory tests)                   |        |
| 16 |                      |      |                                                              |        |
| 17 |                      |      |                                                              |        |
| 18 | Interventions:       | #11d | Relevant concomitant care and interventions that are         | n/a    |
| 19 | concomitant care     |      | permitted or prohibited during the trial                     |        |
| 20 |                      |      |                                                              |        |
| 21 |                      |      |                                                              |        |
| 22 | Outcomes             | #12  | Primary, secondary, and other outcomes, including the        | 8-10   |
| 23 |                      |      | specific measurement variable (eg, systolic blood            |        |
| 24 |                      |      | pressure), analysis metric (eg, change from baseline,        |        |
| 25 |                      |      | final value, time to event), method of aggregation (eg,      |        |
| 26 |                      |      | median, proportion), and time point for each outcome.        |        |
| 27 |                      |      | Explanation of the clinical relevance of chosen efficacy     |        |
| 28 |                      |      | and harm outcomes is strongly recommended                    |        |
| 29 |                      |      |                                                              |        |
| 30 |                      |      |                                                              |        |
| 31 |                      |      |                                                              |        |
| 32 |                      |      |                                                              |        |
| 33 | Participant timeline | #13  | Time schedule of enrolment, interventions (including any     | 6-7+20 |
| 34 |                      |      | run-ins and washouts), assessments, and visits for           |        |
| 35 |                      |      | participants. A schematic diagram is highly recommended      |        |
| 36 |                      |      | (see Figure)                                                 |        |
| 37 |                      |      |                                                              |        |
| 38 |                      |      |                                                              |        |
| 39 |                      |      |                                                              |        |
| 40 | Sample size          | #14  | Estimated number of participants needed to achieve           | 11     |
| 41 |                      |      | study objectives and how it was determined, including        |        |
| 42 |                      |      | clinical and statistical assumptions supporting any sample   |        |
| 43 |                      |      | size calculations                                            |        |
| 44 |                      |      |                                                              |        |
| 45 |                      |      |                                                              |        |
| 46 |                      |      |                                                              |        |
| 47 | Recruitment          | #15  | Strategies for achieving adequate participant enrolment      | 6      |
| 48 |                      |      | to reach target sample size                                  |        |
| 49 |                      |      |                                                              |        |
| 50 |                      |      |                                                              |        |
| 51 | Allocation: sequence | #16a | Method of generating the allocation sequence (eg,            | 11     |
| 52 | generation           |      | computer-generated random numbers), and list of any          |        |
| 53 |                      |      | factors for stratification. To reduce predictability of a    |        |
| 54 |                      |      | random sequence, details of any planned restriction (eg,     |        |
| 55 |                      |      | blocking) should be provided in a separate document that     |        |
| 56 |                      |      |                                                              |        |
| 57 |                      |      |                                                              |        |
| 58 |                      |      |                                                              |        |
| 59 |                      |      |                                                              |        |
| 60 |                      |      |                                                              |        |

is unavailable to those who enrol participants or assign interventions

|    |                       |      |                                                                |       |
|----|-----------------------|------|----------------------------------------------------------------|-------|
| 1  |                       |      |                                                                |       |
| 2  |                       |      |                                                                |       |
| 3  |                       |      |                                                                |       |
| 4  | Allocation            | #16b | Mechanism of implementing the allocation sequence (eg,         | 11    |
| 5  | concealment           |      | central telephone; sequentially numbered, opaque,              |       |
| 6  |                       |      | sealed envelopes), describing any steps to conceal the         |       |
| 7  | mechanism             |      | sequence until interventions are assigned                      |       |
| 8  |                       |      |                                                                |       |
| 9  |                       |      |                                                                |       |
| 10 |                       |      |                                                                |       |
| 11 | Allocation:           | #16c | Who will generate the allocation sequence, who will enrol      | 11    |
| 12 | implementation        |      | participants, and who will assign participants to              |       |
| 13 |                       |      | interventions                                                  |       |
| 14 |                       |      |                                                                |       |
| 15 |                       |      |                                                                |       |
| 16 | Blinding (masking)    | #17a | Who will be blinded after assignment to interventions (eg,     | 12    |
| 17 |                       |      | trial participants, care providers, outcome assessors, data    |       |
| 18 |                       |      | analysts), and how                                             |       |
| 19 |                       |      |                                                                |       |
| 20 |                       |      |                                                                |       |
| 21 | Blinding (masking):   | #17b | If blinded, circumstances under which unblinding is            | n/a   |
| 22 | emergency             |      | permissible, and procedure for revealing a participant's       |       |
| 23 | unblinding            |      | allocated intervention during the trial                        |       |
| 24 |                       |      |                                                                |       |
| 25 |                       |      |                                                                |       |
| 26 |                       |      |                                                                |       |
| 27 | Data collection plan  | #18a | Plans for assessment and collection of outcome,                | 8-11  |
| 28 |                       |      | baseline, and other trial data, including any related          |       |
| 29 |                       |      | processes to promote data quality (eg, duplicate               |       |
| 30 |                       |      | measurements, training of assessors) and a description         |       |
| 31 |                       |      | of study instruments (eg, questionnaires, laboratory tests)    |       |
| 32 |                       |      | along with their reliability and validity, if known. Reference |       |
| 33 |                       |      | to where data collection forms can be found, if not in the     |       |
| 34 |                       |      | protocol                                                       |       |
| 35 |                       |      |                                                                |       |
| 36 |                       |      |                                                                |       |
| 37 |                       |      |                                                                |       |
| 38 |                       |      |                                                                |       |
| 39 | Data collection plan: | #18b | Plans to promote participant retention and complete            | 7     |
| 40 | retention             |      | follow-up, including list of any outcome data to be            |       |
| 41 |                       |      | collected for participants who discontinue or deviate from     |       |
| 42 |                       |      | intervention protocols                                         |       |
| 43 |                       |      |                                                                |       |
| 44 |                       |      |                                                                |       |
| 45 |                       |      |                                                                |       |
| 46 | Data management       | #19  | Plans for data entry, coding, security, and storage,           | 12    |
| 47 |                       |      | including any related processes to promote data quality        |       |
| 48 |                       |      | (eg, double data entry; range checks for data values).         |       |
| 49 |                       |      | Reference to where details of data management                  |       |
| 50 |                       |      | procedures can be found, if not in the protocol                |       |
| 51 |                       |      |                                                                |       |
| 52 |                       |      |                                                                |       |
| 53 |                       |      |                                                                |       |
| 54 | Statistics: outcomes  | #20a | Statistical methods for analysing primary and secondary        | 12-13 |
| 55 |                       |      | outcomes. Reference to where other details of the              |       |
| 56 |                       |      | statistical analysis plan can be found, if not in the protocol |       |
| 57 |                       |      |                                                                |       |
| 58 |                       |      |                                                                |       |
| 59 |                       |      |                                                                |       |
| 60 |                       |      |                                                                |       |

|    |                        |      |                                                              |         |
|----|------------------------|------|--------------------------------------------------------------|---------|
| 1  | Statistics: additional | #20b | Methods for any additional analyses (eg, subgroup and        | 12      |
| 2  | analyses               |      | adjusted analyses)                                           |         |
| 3  |                        |      |                                                              |         |
| 4  | Statistics: analysis   | #20c | Definition of analysis population relating to protocol non-  | 12      |
| 5  | population and         |      | adherence (eg, as randomised analysis), and any              |         |
| 6  | missing data           |      | statistical methods to handle missing data (eg, multiple     |         |
| 7  |                        |      | imputation)                                                  |         |
| 8  |                        |      |                                                              |         |
| 9  |                        |      |                                                              |         |
| 10 |                        |      |                                                              |         |
| 11 | Data monitoring:       | #21a | Composition of data monitoring committee (DMC);              | n/a     |
| 12 | formal committee       |      | summary of its role and reporting structure; statement of    |         |
| 13 |                        |      | whether it is independent from the sponsor and               |         |
| 14 |                        |      | competing interests; and reference to where further          |         |
| 15 |                        |      | details about its charter can be found, if not in the        |         |
| 16 |                        |      | protocol. Alternatively, an explanation of why a DMC is      |         |
| 17 |                        |      | not needed                                                   |         |
| 18 |                        |      |                                                              |         |
| 19 | Data monitoring:       | #21b | Description of any interim analyses and stopping             | 12      |
| 20 | interim analysis       |      | guidelines, including who will have access to these          |         |
| 21 |                        |      | interim results and make the final decision to terminate     |         |
| 22 |                        |      | the trial                                                    |         |
| 23 |                        |      |                                                              |         |
| 24 |                        |      |                                                              |         |
| 25 |                        |      |                                                              |         |
| 26 |                        |      |                                                              |         |
| 27 |                        |      |                                                              |         |
| 28 |                        |      |                                                              |         |
| 29 | Harms                  | #22  | Plans for collecting, assessing, reporting, and managing     | 9       |
| 30 |                        |      | solicited and spontaneously reported adverse events and      |         |
| 31 |                        |      | other unintended effects of trial interventions or trial     |         |
| 32 |                        |      | conduct                                                      |         |
| 33 |                        |      |                                                              |         |
| 34 |                        |      |                                                              |         |
| 35 |                        |      |                                                              |         |
| 36 | Auditing               | #23  | Frequency and procedures for auditing trial conduct, if      | n/a     |
| 37 |                        |      | any, and whether the process will be independent from        |         |
| 38 |                        |      | investigators and the sponsor                                |         |
| 39 |                        |      |                                                              |         |
| 40 |                        |      |                                                              |         |
| 41 |                        |      |                                                              |         |
| 42 | Research ethics        | #24  | Plans for seeking research ethics committee / institutional  | 2+13+15 |
| 43 | approval               |      | review board (REC / IRB) approval                            |         |
| 44 |                        |      |                                                              |         |
| 45 | Protocol               | #25  | Plans for communicating important protocol modifications     | 13      |
| 46 | amendments             |      | (eg, changes to eligibility criteria, outcomes, analyses) to |         |
| 47 |                        |      | relevant parties (eg, investigators, REC / IRBs, trial       |         |
| 48 |                        |      | participants, trial registries, journals, regulators)        |         |
| 49 |                        |      |                                                              |         |
| 50 |                        |      |                                                              |         |
| 51 |                        |      |                                                              |         |
| 52 | Consent or assent      | #26a | Who will obtain informed consent or assent from potential    | 6+12-13 |
| 53 |                        |      | trial participants or authorised surrogates, and how (see    |         |
| 54 |                        |      | Item 32)                                                     |         |
| 55 |                        |      |                                                              |         |
| 56 |                        |      |                                                              |         |
| 57 |                        |      |                                                              |         |
| 58 |                        |      |                                                              |         |
| 59 |                        |      |                                                              |         |
| 60 |                        |      |                                                              |         |

|    |                       |      |                                                                |     |
|----|-----------------------|------|----------------------------------------------------------------|-----|
| 1  | Consent or assent:    | #26b | Additional consent provisions for collection and use of        | n/a |
| 2  | ancillary studies     |      | participant data and biological specimens in ancillary         |     |
| 3  |                       |      | studies, if applicable                                         |     |
| 4  |                       |      |                                                                |     |
| 5  |                       |      |                                                                |     |
| 6  | Confidentiality       | #27  | How personal information about potential and enrolled          | 12  |
| 7  |                       |      | participants will be collected, shared, and maintained in      |     |
| 8  |                       |      | order to protect confidentiality before, during, and after     |     |
| 9  |                       |      | the trial                                                      |     |
| 10 |                       |      |                                                                |     |
| 11 |                       |      |                                                                |     |
| 12 |                       |      |                                                                |     |
| 13 | Declaration of        | #28  | Financial and other competing interests for principal          | 14  |
| 14 | interests             |      | investigators for the overall trial and each study site        |     |
| 15 |                       |      |                                                                |     |
| 16 |                       |      |                                                                |     |
| 17 | Data access           | #29  | Statement of who will have access to the final trial           | 12  |
| 18 |                       |      | dataset, and disclosure of contractual agreements that         |     |
| 19 |                       |      | limit such access for investigators                            |     |
| 20 |                       |      |                                                                |     |
| 21 |                       |      |                                                                |     |
| 22 | Ancillary and post    | #30  | Provisions, if any, for ancillary and post-trial care, and for | n/a |
| 23 | trial care            |      | compensation to those who suffer harm from trial               |     |
| 24 |                       |      | participation                                                  |     |
| 25 |                       |      |                                                                |     |
| 26 |                       |      |                                                                |     |
| 27 | Dissemination         | #31a | Plans for investigators and sponsor to communicate trial       | 13  |
| 28 | policy: trial results |      | results to participants, healthcare professionals, the         |     |
| 29 |                       |      | public, and other relevant groups (eg, via publication,        |     |
| 30 |                       |      | reporting in results databases, or other data sharing          |     |
| 31 |                       |      | arrangements), including any publication restrictions          |     |
| 32 |                       |      |                                                                |     |
| 33 |                       |      |                                                                |     |
| 34 |                       |      |                                                                |     |
| 35 |                       |      |                                                                |     |
| 36 | Dissemination         | #31b | Authorship eligibility guidelines and any intended use of      | n/a |
| 37 | policy: authorship    |      | professional writers                                           |     |
| 38 |                       |      |                                                                |     |
| 39 |                       |      |                                                                |     |
| 40 | Dissemination         | #31c | Plans, if any, for granting public access to the full          | n/a |
| 41 | policy: reproducible  |      | protocol, participant-level dataset, and statistical code      |     |
| 42 | research              |      |                                                                |     |
| 43 |                       |      |                                                                |     |
| 44 |                       |      |                                                                |     |
| 45 | Informed consent      | #32  | Model consent form and other related documentation             | n/a |
| 46 | materials             |      | given to participants and authorised surrogates                |     |
| 47 |                       |      |                                                                |     |
| 48 |                       |      |                                                                |     |
| 49 | Biological            | #33  | Plans for collection, laboratory evaluation, and storage of    | n/a |
| 50 | specimens             |      | biological specimens for genetic or molecular analysis in      |     |
| 51 |                       |      | the current trial and for future use in ancillary studies, if  |     |
| 52 |                       |      | applicable                                                     |     |
| 53 |                       |      |                                                                |     |
| 54 |                       |      |                                                                |     |
| 55 |                       |      |                                                                |     |

The SPIRIT checklist is distributed under the terms of the Creative Commons Attribution License CC-BY-ND 3.0. This checklist was completed on 29. March 2019 using <https://www.goodreports.org/>, a tool made by the [EQUATOR Network](#) in collaboration with [Penelope.ai](#)

# BMJ Open

**Web-based support for self-management strategies versus usual care for people with COPD in primary healthcare: a protocol for a randomised, 12 months, parallel-group pragmatic trial.**

|                                 |                                                                                                                                                                                                                                                                                                                                                                                                                     |
|---------------------------------|---------------------------------------------------------------------------------------------------------------------------------------------------------------------------------------------------------------------------------------------------------------------------------------------------------------------------------------------------------------------------------------------------------------------|
| Journal:                        | <i>BMJ Open</i>                                                                                                                                                                                                                                                                                                                                                                                                     |
| Manuscript ID                   | bmjopen-2019-030788.R2                                                                                                                                                                                                                                                                                                                                                                                              |
| Article Type:                   | Protocol                                                                                                                                                                                                                                                                                                                                                                                                            |
| Date Submitted by the Author:   | 06-Sep-2019                                                                                                                                                                                                                                                                                                                                                                                                         |
| Complete List of Authors:       | Stenlund, Tobias; Umea University Department of Community Medicine and Rehabilitation, Physiotherapy<br>Nyberg, André; Umea University Department of Community Medicine and Rehabilitation, Physiotherapy<br>Lundell, Sara; Umea University Department of Community Medicine and Rehabilitation, Physiotherapy<br>Wadell, Karin; Umea University Department of Community Medicine and Rehabilitation, Physiotherapy |
| <b>Primary Subject Heading</b>: | Respiratory medicine                                                                                                                                                                                                                                                                                                                                                                                                |
| Secondary Subject Heading:      | Health informatics                                                                                                                                                                                                                                                                                                                                                                                                  |
| Keywords:                       | Pulmonary Disease, Chronic obstructive, eHealth, self-management strategies, PRIMARY CARE                                                                                                                                                                                                                                                                                                                           |
|                                 |                                                                                                                                                                                                                                                                                                                                                                                                                     |

SCHOLARONE™  
Manuscripts

1  
2  
3  
4 **Web-based support for self-management strategies versus usual care for**  
5 **people with COPD in primary healthcare: a protocol for a randomised, 12**  
6 **months, parallel-group pragmatic trial.**  
7  
8

9  
10 **AUTHORS**

11 Tobias Stenlund, PhD, Dept. of Community Medicine and Rehabilitation, Physiotherapy, Umeå  
12 University, Umeå, 90187 Sweden. Tel.: +46907868040. E-mail: [tobias.stenlund@umu.se](mailto:tobias.stenlund@umu.se)

13  
14  
15 André Nyberg, Associate Professor, Dept. of Community Medicine and Rehabilitation, Physiotherapy,  
16 Umeå University, Umeå, 90187 Sweden. E-mail: [andre.nyberg@umu.se](mailto:andre.nyberg@umu.se)

17  
18  
19 Sara Lundell, PhD, Dept. of Community Medicine and Rehabilitation, Physiotherapy, Umeå University,  
20 Umeå, 90187 Sweden. E-mail: [sara.lundell@umu.se](mailto:sara.lundell@umu.se)

21  
22  
23 Karin Wadell, Professor, Dept. of Community Medicine and Rehabilitation, Physiotherapy, Umeå  
24 University, Umeå, 90187 Sweden. E-mail: [karin.wadell@umu.se](mailto:karin.wadell@umu.se)

25  
26  
27 Corresponding author: PhD Tobias Stenlund Dept. of Community Medicine and Rehabilitation,  
28 Physiotherapy, Umeå University, Umeå, 90187 Sweden. Tel.: +46907868040. E-mail:  
29 [tobias.stenlund@umu.se](mailto:tobias.stenlund@umu.se)  
30  
31

32  
33  
34 Keywords: Pulmonary Disease, Chronic obstructive; eHealth; primary care; self-management  
35 strategies  
36

37 Word Count: 3984  
38  
39  
40  
41  
42  
43  
44  
45  
46  
47  
48  
49  
50  
51  
52  
53  
54  
55  
56  
57  
58  
59  
60



## ABSTRACT

### Introduction

The use of adequate self-management strategies for people with chronic obstructive pulmonary disease (COPD) may increase the level of physical activity (PA), improve health-related quality of life (HRQoL) and reduce healthcare use. Whether web-based support in addition to prompts (e-mail and SMS) could be used to promote self-management strategies to facilitate behaviour change in people with COPD is not clear. This clinical trial aims to generate evidence on the effect of a web-based solution, the COPD Web, in a cohort of people with COPD in a primary healthcare context.

### Methods and analysis

The overall design is a pragmatic randomised controlled trial with pre- and post-assessments (3 and 12 months) and an implementation and user experience evaluation. People with a diagnosis of COPD, treated in primary healthcare will be eligible for the study. A total of 144 participants will be enrolled by healthcare professionals at included primary healthcare units and, after fulfilled baseline assessments, randomised to either control or intervention group. All participants will receive usual care, a pedometer, and a leaflet about the importance of PA. Participants in the intervention will, in addition, get access to the COPD Web, an interactive self-managed website that aims to support people with COPD in self-management strategies. They will also continuously get support from prompts with a focus on behaviour change.

The effect on participants' PA, dyspnea, COPD related symptoms, HRQoL, and health economics will be assessed using accelerometer and questionnaires. To identify enablers and barriers for the use of web-based support to change behaviour, semistructured interviews will be conducted in a subgroup of participants at the 3 months follow-up.

### Ethics and dissemination

Ethical approval has been received from the Regional Ethical Review Board in Umeå, Sweden. Dnr 2018-274-31. Findings will be presented at conferences, submitted for publication in peer-reviewed journals and presented to the involved healthcare professionals, participants, and patient organisations.

### Trial registration number

ClinicalTrials.gov: NCT03746873

## Article Summary

### Strengths and limitations of this study

- Physical activity level will be objectively measured and bring the field forward regarding knowledge about both short- and long-term effects of using web-based support.
- Information on how and how much the participants have used the COPD Web will automatically be collected and analysed throughout the full intervention period, which will increase the understanding of the link between the use of the COPD Web and the possible effects.
- The pragmatic design with generous inclusion criteria and many recruiting primary healthcare units could enhance external validity.
- Prompts will be sent continuously as a reminder and strategy to encourage greater exposures to the COPD Web.
- One limitation is that the sample size is large enough for analysing the effect on physical activity level but may not be large enough for all secondary outcomes.

## Introduction

### Background and rationale

Chronic obstructive pulmonary disease (COPD) is a chronic and disabling disease with substantial morbidity and mortality. The disease has a steady increase in prevalence and is now the third leading cause of death worldwide.<sup>1</sup> The high prevalence places a considerable burden on the healthcare system with a total yearly cost of COPD in Sweden estimated to 13.9 billion SEK.<sup>2</sup> The mean annual total costs for each person with COPD is 67% higher compared to a person without COPD.<sup>3</sup>

The symptom burden of the disease; respiratory symptoms as progressive dyspnea, fatigue, impaired physical performance, decreased level of physical activity (PA) and health-related quality of life (HRQoL)<sup>4</sup> is not only a consequence of the underlying condition, but depend also on the individuals' adaptation to the illness and their ability to manage their disease.<sup>5,6</sup> Self-management strategies, including strategies to promote change in health behaviour by increasing the individual's knowledge and skills and their confidence in successfully managing their disease, is therefore now an essential part of COPD management.<sup>5</sup> This have shown to reduce breathlessness and impact of COPD in daily life, increase physical performance, level of PA, HRQoL, adherence to medication, as well as improve time to recovery after acute exacerbations and reduce overall health-related costs.<sup>5,7,8</sup> An increased level of PA is of utmost importance and something to promote<sup>9</sup> since PA has been shown to be decreased early in the disease progression<sup>10</sup> and degree of PA is considered the strongest predictor of all-cause mortality in people with COPD.<sup>11,12</sup>

Despite that treatment guidelines and literature strongly supports that non-pharmacological treatment (i.e., education, self-management strategies, exercise training)<sup>13</sup> should be provided, the vast majority of people with COPD are still excluded from these activities.<sup>14,15</sup> Web-based solutions are promising means of delivering health service, and may increase level of PA<sup>16,17</sup> as well as reduced use of health services.<sup>18</sup> However, studies evaluating whether web-based support could be used to promote self-management strategies to support increased PA in people with COPD are contradictory. One showed no effect on PA while other studies showed improved PA<sup>19-21</sup> but that the improvement may not be sustained over a long duration.<sup>21</sup>

The COPD Web is a web-based solution, developed by our research group in co-creation with people with COPD, their relatives, healthcare professionals in primary healthcare (PHC) and researchers.<sup>22</sup> In a pilot study on 83 people with COPD<sup>23,24</sup> promising results with an increased self-reported level of PA were shown. To know whether this is true also for a larger COPD population, an adequately powered randomised controlled trial with short and long-term evaluation is needed.

## Objectives

The main aim is to generate evidence on the effect of the COPD Web in a cohort of people with COPD, currently enrolled for usual care within the PHC context in Sweden. This is of importance, as the vast majority of people with COPD are treated within PHC.<sup>13 15</sup> The specific aims are to evaluate the short and long-term effect of the use of the COPD Web in an adequately powered group of people with COPD in PHC context, regarding i) level of PA; ii) dyspnea iii) HRQoL, iv) COPD related symptoms, v) health economics in relation to healthcare use; and vi) to identify enablers and barriers for the use of web-based support with the COPD Web in order to change behaviour.

We hypothesise that access and use of the COPD Web, in comparison to usual care, will:

- i) increase level of objectively measured PA in people with COPD,
- ii) decrease dyspnea,
- iii) increase disease-specific HRQoL,
- iv) decrease the number of and/or severity of COPD-related symptoms, and
- v) decrease the number of COPD-related healthcare contacts in PHC.

## Methods and analysis

### Trial design

The design is a pragmatic randomised controlled trial with pre- and post-assessments (3 and 12 months) in addition to user experience and implementation evaluation. The user experience and implementation evaluation is a necessary complement to understand more about enablers and barriers for behaviour change using web-based support. The study is designed as a pragmatic trial<sup>25</sup> meaning that healthcare professionals, primarily COPD nurses, are involved in recruiting participants, the access to the intervention (COPD Web) is given by the researchers, but the intervention itself only uses self-instructional material and prompts (SMS and email). This design aims to minimise the effort from healthcare professionals and increase the possibility of self-management for people with COPD to improve the applicability of the findings to other healthcare settings. The protocol complies with the SPIRIT (Standard Protocol Items: Recommendations for Interventional Trials) recommendations for protocol reporting<sup>26 27</sup> (Additional file 1) and the study will be reported according to CONSORT (Consolidated Standards of Reporting Trials) guidelines for pragmatic trials<sup>25</sup> and eHealth.<sup>28</sup>

### Patient and Public Involvement (PPI)

We did not directly include PPI in this study, but our research group in co-creation with PPI developed the COPD Web used in the study.

## Participants and intervention

### Study settings

PHC units from different County Councils in Sweden will constitute the study sites. The number of units is not limited; consequently, more units may be included during the study. At present 25 units are included, 13 of them situated in urban areas and 12 located in smaller cities or rural areas. The number of enrolled citizens at the included units range between 5,700 and 20,300 citizens. One unit has no enrolled citizens but acts as a rehabilitation unit that treats patients with a referral from other PHC units. We will include both publicly funded PHC units and private alternatives.

### Eligibility criteria

The trial will be conducted from 15 November 2018 until 144 participants are included. All people with a diagnosis of COPD (ICD-10:J44:9) who visit involved PHCCs due to their COPD will be eligible for inclusion in the study if they 1) can read and understand Swedish, 2) have a smartphone, tablet or computer with access to internet, 3) don't have dementia or other psychiatric condition that can prevent understanding of the intervention, 4) don't have severe comorbidity that can be considered as the contributing factor for limitation in PA, and 5) don't already use the COPD Web. In the case of exacerbation, the participant has to wait six weeks from the start of pharmacological treatment, before being eligible to the study.

### Participant timeline

The recruitment begins at included PHC units. To facilitate the recruitment of participants, the number of included units will not be restricted to nor the units size, location, how they are funded or the type of care and rehabilitation that the unit offers. Written consent from the operational manager has to be fulfilled before recruitment can start.

To increase the possibility of recruiting participants, the number of exclusion criteria are kept to a minimum. The recruitment will take place during the participant's regular visits to the PHC unit where healthcare professionals will give information about the study. People with COPD interested in participation will have their contact information and results from latest pulmonary function test (if older than six months, a new pulmonary function test will be performed) sent to the research group as displayed in table 1. A researcher (TS) will after verbal agreement send informed consent form, questionnaires, and activity monitor for baseline assessment to the participants' homes. When the written informed consent and the baseline assessment is fulfilled, the participants' are included and randomised to either the control or intervention group. Follow-up measurements with questionnaires and activity monitor will be conducted at 3 and 12 months after inclusion. A semi-

1  
2  
3 structured interview will be done after the 3 months follow-up among a convenient sample of the  
4 intervention group.  
5

6  
7 The participants will be contacted by phone before every assessment to ensure a suitable date for  
8 the activity monitoring. In case of non-response after any evaluation, the participant will be  
9 reminded by phone or/and email weekly. These precautions will be made to maintain the participant  
10 in the study and increase the number of complete follow-ups.  
11  
12  
13

## 14 **Intervention**

15  
16 The COPD Web consists of several sections of which one is targeting people with COPD, shown in  
17 figure 1. The section targeting people with COPD aims to support self-management and includes, in  
18 addition to texts, pictures, and films, also interactive components, e.g. registration of PA with  
19 person-tailored, automatised feedback. Automatised feedback in combination with step counting has  
20 been found useful to increase PA in people with COPD.<sup>29</sup> On the website, people with COPD can gain  
21 know-how about, e.g. PA, physical training, breathing techniques, exacerbation symptoms, advice on  
22 when to contact healthcare, and how to make everyday activities less strenuous. The content refers  
23 to and aligns with the guidelines for COPD care developed and published by the National Board of  
24 Health and Welfare in Sweden.<sup>13</sup>  
25  
26  
27  
28  
29  
30  
31

32 Figure 1. A website map of the COPD Web showing the section “I have COPD”.  
33

## 34 **The intervention group**

35  
36 Participants randomised to the intervention group will be introduced to the COPD Web by a letter  
37 containing written information, the password to get access to the website and information on how to  
38 create an account. To secure standardised instructions, there will be an instruction movie available  
39 on the website, (Box 1).  
40  
41  
42

43 Box 1. The content of the movie, presenting the administration of the COPD Web.  
44

- |                                                                                                                                                                                                                                                                                                                                                                                                                                                                                                                                                                                                                                                                                                                                                      |
|------------------------------------------------------------------------------------------------------------------------------------------------------------------------------------------------------------------------------------------------------------------------------------------------------------------------------------------------------------------------------------------------------------------------------------------------------------------------------------------------------------------------------------------------------------------------------------------------------------------------------------------------------------------------------------------------------------------------------------------------------|
| <ol style="list-style-type: none"><li>45 1) Introduction of the website structure, the content in the main headings and functions of the<br/>46 website, e.g., how to enlarge or shrink the text, listen to the text, and bookmark information<br/>47 of particular interest.</li><li>48 2) Introduction to the section “Physical activity.” Information about the importance of PA, and<br/>49 demonstration of the page for registration of PA (steps) with automated feedback.</li><li>50 3) Information on how to set an initial weekly step goal and instructions to insert the weekly<br/>51 step-count onto the page for registration of PA at the end of each week.<br/>52<br/>53<br/>54<br/>55<br/>56<br/>57<br/>58<br/>59<br/>60</li></ol> |
|------------------------------------------------------------------------------------------------------------------------------------------------------------------------------------------------------------------------------------------------------------------------------------------------------------------------------------------------------------------------------------------------------------------------------------------------------------------------------------------------------------------------------------------------------------------------------------------------------------------------------------------------------------------------------------------------------------------------------------------------------|

1  
2  
3 The COPD Web will be self-managed. To reduce user problems, one of the researchers (TS) will  
4 contact each participant in the first week of intervention. To test the participants' interest for and  
5 acceptability of the function of registering PA (steps) on the website, the participants will receive a  
6 pedometer with instructions on how it is used.  
7  
8  
9

10 Throughout the intervention, participants will receive prompts via email and SMS (figure 2). The  
11 prompts will include targeted information, referral links to the COPD Web, and a reminder to register  
12 counted steps to improve adherence to the intervention. Prompts has shown enhanced effectiveness  
13 on limited contact interventions targeting health behaviours including PA<sup>30</sup> and proved to be useful  
14 also on people with COPD<sup>29</sup> though there is no consensus regarding the number and frequency of  
15 prompts. Frequently delivered prompts have been recommended however too excessive appearance  
16 may decrease the desired response.<sup>31</sup> Consequently, the frequency of the prompts will be each week  
17 at the beginning of the intervention and decrease to biweekly (week 13 to 24) and every fourth week  
18 (week 25 to 52). In total, we will deliver 24 different prompts with predetermined content and order  
19 to each participant.  
20  
21  
22  
23  
24  
25  
26  
27

28 Figure 2. Distribution of prompts (SMS and email) to participants in the intervention group.  
29  
30  
31

### 32 **The control group**

33 The control group will, similar to the intervention group, receive a pedometer with instructions, as  
34 well as a leaflet about the importance of PA in addition to usual care. In Sweden, the majority of all  
35 people with COPD are treated within PHC.<sup>13 15</sup> Usual care within PHC are recommended to include,  
36 but are not restricted to, use of long-acting anticholinergics and long-acting  $\beta$ 2-agonists with 24 h  
37 duration and support for; smoking cessation, PA and exercise, self-management and nutrition.<sup>13</sup> All  
38 participants are permitted to start COPD rehabilitation or other interventions if offered at their PHC  
39 unit.  
40  
41  
42  
43  
44  
45

### 46 **Outcomes and evaluation**

47 Various methods for data collection including questionnaires, accelerometer, data from medical  
48 records (participant's latest pulmonary function test), qualitative interviews, and user data from the  
49 COPD Web will be used. Table 2 provides an overview of methods for data collection in this study.  
50  
51  
52  
53

### 54 **Primary outcome measures**

55 The primary outcome of the effect of the COPD Web is the difference in the level of PA between  
56 intervention and control groups at follow-ups (3 and 12 months). Level of PA will be objectively  
57 measured seven consecutive days using an accelerometer (DynaPort<sup>®</sup>, McRoberts BV, the  
58  
59  
60

1  
2  
3 Netherlands) and subjectively measured with indicator questions on PA from the National Board of  
4 Health and Welfare in Sweden.<sup>32 33</sup> Weekends and weekdays with less than eight hours of wearing  
5 time of the accelerometer and measurements with less than four valid days of measurements will be  
6 excluded.<sup>34</sup> The Dynaport accelerometer has been found valid and reliable when used in people with  
7 COPD.<sup>34 35</sup>

### 11 12 **Secondary outcome measures**

13  
14 The secondary outcomes of the effect of the COPD Web are the differences between the  
15 intervention and control groups at the follow-ups at 3 and 12 months regarding participants'  
16 dyspnea; modified Medical Research Council dyspnea scale (mMRC)<sup>36</sup>, HRQoL; Chronic Respiratory  
17 Questionnaire, self-administered (CRQ-SA)<sup>37</sup>, and COPD-related symptoms; COPD Assessment Test  
18 (CAT).<sup>38</sup> Evaluation of health economics will be done using EQ-5D<sup>39</sup> to estimate quality-adjusted life  
19 (QALY) gained, commonly used in economic evaluation.<sup>40</sup> In addition, the number of participant self-  
20 reported COPD-related healthcare contacts will be evaluated where a reduction in health  
21 consumption indicates a reduced economic burden. Secondary outcomes were chosen according to  
22 results in the pilot study and since they cover specific aspects of the content of the COPD Web. Most  
23 of them have previously been used in COPD and a Swedish context.

### 31 32 **User experience and implementation evaluation**

33  
34 For user experience evaluation, data will be collected after 3 months using semi-structured individual  
35 interviews in a subgroup of participants randomised to intervention. The participants will be asked to  
36 take part in an interview at 3 months follow-up. The interviews will include questions regarding  
37 unexpected events or consequences of receiving the COPD Web, their use of the website, and how  
38 this use has influenced their PA behaviour. Study-specific documentation and automatised data on  
39 the participants' use of the COPD Web will be collected automatically from the website, e.g., the  
40 number of visits, pages used, and time spent on the website. This will add valuable information to  
41 the experience valuation but also make it possible to evaluate the fidelity to the intervention. In  
42 order to evaluate the implementation and reach, study-specific documentation including the number  
43 of participants who decline to take part in the intervention as well as dropouts will be noted. In  
44 addition, the reasons to decline will be noted when appropriate. All participants will also answer  
45 study-specific questions regarding other ongoing or started interventions, hospitalisations or  
46 exacerbations that could affect the results.



Table 2. Methods for data collection.

**Physical objectively measured physical activity (PA) level**

- Accelerometer (DynaPort, McRoberts BV (DynaPort®, McRoberts BV, The Netherlands) placed on the lower back 24 hours a day over seven consecutive days.<sup>34 35</sup>
  - The quantity of PA will be assessed using the mean number of steps per day and the number of days per week that the participant could be considered physically active. Physically active is operationally defined as  $\geq 5000$  steps per day.
  - The Dynaport accelerometer has been found valid and reliable when used in people with COPD.<sup>34 35</sup>

**Physical subjectively assessed PA level**

- Questionnaire from the National Board of Health and Welfare.<sup>33</sup>
  - The time spent in physical activities such as taking a walk or working in the garden during last week is rated by choosing between pre-specified options (no time at all/30–60 min/60–90 min/9–120 min/>120 min).
  - The time spent in physical exercises such as running or doing exercise to keep fit during last week is rated by choosing between pre-specified options (no time at all/30–60 min/60–90 min/9–120 min/>120 min).
  - The categorical mode of the scale has shown low-to-moderate associations with objectively measured PA level, maximal oxygen uptake, physical performance, balance, cardiovascular biomarkers, and self-rated health.<sup>32</sup>

**Health-related quality of life (HRQoL)**

- CRQ-SA The Swedish version of the self-administrated Chronic Respiratory Questionnaire.<sup>37</sup>
  - CRQ-SA aims to measure HRQoL in people with chronic respiratory distress. The questionnaire consists of 20 questions divided into four areas (dyspnea, fatigue, emotional function, and control) that are rated on a 7-graded Likert scale. The questions include, for example, "How often in the last two weeks have you known that you had complete control over your breathing problems?" and "In the last two weeks, how often have you known that you had low energy?".<sup>37</sup>
  - CRQ-SA has shown strong responsiveness to changes in HRQoL for people with COPD.<sup>41</sup>

**COPD-related symptoms**

- The questionnaire COPD Assessment Test (CAT).<sup>38</sup>
  - The severity of eight COPD-related symptoms (coughing, the presence of phlegm, feeling of tightness in the chest, breathlessness when walking, limitation in activities, confidence in leaving home, sleep, and energy) is rated on a six-grade scale.
  - Evaluated for internal consistency, stability over time in stable patients and ability to discriminate between stable and exacerbation patients with excellent or very good results.<sup>38</sup>

**Dyspnea**

- The questionnaire modified Medical Research Council Dyspnea Scale (mMRC).<sup>36</sup>
  - Perceived dyspnea is rated on a 5-graded Likert scale ranging from 0 ("I just get out of breath when I exert myself greatly" to 4 ("I get out of breath when I wash or get dressed").
  - Evaluated for categorising people with COPD in terms of disability with good results.<sup>42</sup>

**Health economics**

- Self-reported healthcare contacts related to COPD.
- The questionnaire EuroQol five dimensions questionnaire(EQ-5D).<sup>39</sup>
  - Health status is rated on five items; three items relate to problems in mobility, self-care, and usual activities, and two items cover the presence and severity of pain and anxiety/depression. Each item is rated on a three-grade scale corresponding to no problem/some or moderate problems/extreme problems.

- General health is rated on a scale ranging from 0 (worst imaginable health state) to 100 (best possible health state).
- Evaluation of health economy will be done using EQ-5D to estimate quality-adjusted life (QALY) gained.<sup>40</sup> Also, the number of COPD-related health contacts and hospitalisation that occurs during the intervention will be followed and cost estimated.
- EQ-5D can discriminate between groups of people with different severity of COPD.<sup>43</sup>

### **Implementation**

- Implementation of the COPD Web.
  - Semi-structured interviews will be performed according to a pre-specified interview guide, and user statistics from the website will be analysed.
- Fidelity to the intervention.
  - Semi-structured interviews will be performed according to a pre-specified interview guide.
- Reach.
  - Study-specific documentation including the number of participants who decline to take part in the intervention will be analysed. When appropriate, the reasons to decline will be noted.
- Enablers and barriers for the use of web-based support like the COPD Web.
  - Semi-structured interviews will be performed according to a pre-specified interview guide and analysed.

---

COPD, chronic obstructive pulmonary disease.

## **Data collection, management, and analysis**

### **Sample size calculation**

The sample size was calculated with the premises that a total of 144 participants with COPD would be required to detect a mean difference of 1131 steps with a standard deviation of 2193 steps<sup>44</sup>,  $\alpha = 0.05$ ,  $\beta = 0.20$  (80% power), and a two-tailed test of significance including an estimated dropout rate of 20%.<sup>29</sup> Approximately 10-15 participants will be recruited to individual interviews to have various experiences represented. A wide distribution of age, disease severity and an equal number of women and men will be strived for.

### **Randomisation and masking**

A permuted block design with a random block size varying from 4 to 8 in a 1:1 allocation ratio will be computer generated to randomise participants. This approach is chosen to achieve balanced and evenly distributed samples. A third party, not involved in data collection or analysis of the results, will perform the randomisation and the result will be stored in sealed envelopes. Thus, the randomisation will be revealed for the researcher when the baseline registration and written informed consent are fulfilled, and the sealed envelope next in order is opened. The researcher then will send a letter containing the result of group allocation, a pedometer, a pamphlet about PA, and information about when the participant will be contacted again. The members of the intervention group will, in addition, receive the material and information on how to start using the COPD Web.

1  
2  
3 Due to the character of the intervention, blinding of trial participants will not be applicable.  
4 Furthermore, as all data are self-reported, neither is blinding of outcome assessors applicable.  
5  
6

### 7 **Data management and monitoring**

8  
9 To ensure confidentiality, participants with COPD will get a unique identification (ID) when included  
10 in the study. The code list linking participants and ID number will be kept separate from the data.  
11 Data will be analysed by ID only. All records that contain names or other personal identifiers, such as  
12 locator forms and informed consent forms, will be stored separately from study records identified by  
13 the ID number. The local database will be secured with a password-protected access system. All data  
14 will be coded and reported on group level. Thus it will not be possible to identify specific participants  
15 in the trial. We will use two-pass verification to ensure correct data entry. No interim analyses or  
16 stopping guidelines are pre-specified. Only the researchers will have access to the final trial dataset.  
17  
18  
19  
20  
21  
22

### 23 **Statistics and qualitative analysis**

24  
25 The primary analysis will be an intention-to-treat analysis (including all participants randomised). In  
26 addition, a complete case population (participants with full outcome measurements independent on  
27 adherence to intervention), and a per-protocol analysis (defined as at least one login besides creating  
28 an account on the COPD Web or answering that the SMS and email with referral links have been used  
29 at least rarely (1-3 times) at the follow-ups) will be performed. Missing data will be imputed in the  
30 intention-to-treat analysis using multiple imputation assuming data is missing at random conditional  
31 on participants' severity of disease and self-reported history of exacerbations. This is because the  
32 severity of disease and history of exacerbations are known risk factors for future exacerbations and  
33 may affect adherence to PA interventions.<sup>45</sup>  
34  
35  
36  
37  
38  
39

40 The difference in the primary outcome between the intervention and control group will be estimated  
41 using multilevel mixed-effects models with subjects at level 1 and PHC units at level 2. PHC units and  
42 subjects will be modelled as random effects while group (intervention group vs. control group), time  
43 and group\*time interaction as fixed effects. Estimates of effect sizes will be computed using Cohen's  
44  $d$  ( $d = \text{difference in group means/error SD within}$ ). Calculated as the difference between predicted  
45 means from the final mixed-effects model for a given pair of groups divided by the estimated within-  
46 group error SD in the model with the estimated value of  $2\sigma_e^2$ , where  $\sigma_e^2$  is the residual variance. To  
47 judge the quality of the model we, will analyse the residuals. No sub-group or adjusted analyses  
48 other than the pre-specified complete case and per-protocol analysis will be performed.  
49  
50  
51  
52  
53  
54  
55

56 The individual interviews will be analysed using qualitative content analysis according to the  
57 procedures presented by Graneheim.<sup>46</sup> The interviews transcriptions will be read, coded, and  
58 categorised by one researcher. Two other researchers will also read and code independently for  
59  
60

1  
2  
3 triangulation. Organisation and labelling of categories will be discussed and modified throughout the  
4 process.  
5

### 6 7 **Amendments**

8  
9 Any modifications to the protocol that may influence the conduct of the study, the potential benefit  
10 of the participant or may affect participant safety, including changes of study objectives, study  
11 design, population, sample sizes, study procedures or significant administrative aspects will require a  
12 formal amendment to the protocol. Such modifications will be agreed upon by the research group  
13 with the final decision by the principal investigator, and if needed to be approved by the local ethics  
14 committee.  
15  
16  
17  
18

19 Administrative changes of the protocol (e.g., minor corrections and clarifications) that do not  
20 influence how the study is conducted will be agreed upon by the research group with the final  
21 decision by the principal investigator and will be documented and presented upon publication.  
22  
23  
24

### 25 **Ethics approval and consent to participate**

26  
27 Ethical approval has been received from the Regional Ethical Review Board in Umeå, Sweden. Dnr  
28 2018-274-31. All participants will receive brief, comprehensible oral and written information, by the  
29 Helsinki Declaration.<sup>47</sup> A first informed consent confirms that contact information and latest  
30 pulmonary function test from the potential participant can be collected by healthcare professionals  
31 and sent to the researchers. The participant will, together with the baseline assessment, send a  
32 second and final informed consent to the researcher. The informed consent from operational  
33 managers will be sent and stored at the Regional Ethical Review Board in Umeå, Sweden.  
34  
35  
36  
37  
38  
39

### 40 **Dissemination**

41 The results of this study will be submitted for publication in peer-reviewed journals and presented at  
42 conferences both nationally and internationally as well as to included healthcare professionals,  
43 participants, and patient organisations for people with COPD.  
44  
45  
46

### 47 **Trial registration**

48 Registration of the clinical trial before the enrolment of the first participant was performed. Date of  
49 trial initial release 2018-11-15 and published 2018-12-20. ClinicalTrials.gov identifier: NCT03746873.  
50 The recruitment began 2018-11-15 and will continue until sufficient power is reached.  
51  
52  
53  
54  
55  
56  
57  
58  
59  
60

## Discussion

This study protocol presents a pragmatic randomised controlled trial with pre- and post-assessments aimed at evaluating the effect of the use of the COPD Web for people with COPD in a PHC context.

The study also intends to evaluate the implementation and to identify enablers and barriers to use of web-based support to change behaviour among people with COPD. Currently, despite its proven effectiveness, access to self-management interventions is limited<sup>2 14</sup>, and alternative ways of promoting self-management for people with COPD are warranted. A recent pilot trial has shown that giving people with COPD access to the COPD Web may be an effective short-term strategy to promote self-management that increase levels of PA, promote conceptual knowledge and alter disease management strategies.<sup>24</sup> However, these results need to be confirmed in a definitive large-scale randomised trial, including both short- and long-term evaluation.

This proposed trial will provide new knowledge to this research area by evaluating the effect of the use of web-based support for increasing access to self-management strategies for people with COPD and determine its effect on clinically relevant outcomes. This trial will include short- (3 months) and long-term perspectives (12 months) with objectively measured PA in addition to the self-reported PA that will contribute with more knowledge regarding the effect of having access to the COPD Web. PA is of utmost importance, as the level of PA is one of the strongest predictors of mortality among people with COPD.<sup>11 12</sup>

A user experience and implementation evaluation of the intervention will provide novel information and understanding about enablers and barriers for the use of web-based support to change behaviour. This information will increase knowledge of how the process of receiving the intervention can be interpreted. It will also help us draw better conclusions regarding acceptance, fidelity, and implementation of the COPD Web.

Guided by the pilot study, prompts will be used to encourage the use of the website during the intervention period.<sup>24</sup> The reminders will provide information with referral links that will appear in a predefined way. Prompts have been proven effective in other setups, but there is no consensus regarding the number of prompts or frequency, especially in a longer perspective.<sup>31</sup> The effect of the prompts will be qualitatively evaluated through the semi-structured interviews. The evaluation will answer how the prompts were perceived and if they induced more frequent use and/or changed behaviour regarding PA among the participants. The use of the COPD Web will be automatically registered through the whole intervention since the participants need to log in to access the website. That measure makes it possible to analyse the fidelity to the intervention and answer if there is an

1  
2  
3 association between the use of the COPD Web, e.g., time and number of visits and any possible  
4 effect.  
5

6  
7 As the study is designed as a pragmatic trial<sup>25</sup>, the intervention will be self-managed and distance-  
8 based to maximise the clinical applicability of the findings. One concern is that there might be  
9 participants who do not manage the instructions to create their account and learn how to use the  
10 website. However, they will be contacted at the beginning of the intervention to reduce user  
11 problems. The pragmatic approach also means that there is no selection on the number, size, or  
12 location of the recruiting PHC units. Also, the inclusion criteria are set wide with a minimised  
13 selection beyond diagnosed COPD that could enhance the recruitment rates and finally increase the  
14 clinical applicability of the findings within PHC. One limitation is that the sample size, calculated on  
15 PA, will be large enough for evaluation of the PA but may not be powered enough for all secondary  
16 outcome or sub-group analyses. The latter much depending on the severity of symptoms among the  
17 participants.  
18

19 In conclusion, this pragmatic randomised trial will provide clinically relevant information on the  
20 effect of the use of the COPD Web in people with COPD in a PHC context regarding level of PA,  
21 dyspnea, HRQoL, COPD-related symptoms and health economics in relation to healthcare use, as well  
22 as barriers and enablers for using web-based support with solutions such as the COPD Web.  
23  
24  
25

### 26 27 28 29 30 31 32 33 34 35 36 **Ethics approval and consent to participate**

37  
38  
39 Regional Ethical Review Board in Umeå, Sweden.  
40

### 41 **Availability of data and materials**

42  
43  
44 Not applicable.  
45

### 46 **Consent for publication**

47  
48  
49 Not applicable.  
50

### 51 **Competing interests**

52  
53 AN reports lecture fees from AstraZeneca.  
54

### 55 **Author Contributions**

56  
57  
58 TS has made a direct and substantial contribution to this work by contributing to the conception and  
59 design of the study, designing and writing of the protocol. AN has made a direct and substantial  
60

1  
2  
3 contribution to this work by contributing to the conception and design of the study, sample size  
4 calculation and choice of statistics, designing and writing of the protocol. SL has made a direct and  
5 substantial contribution to this work in providing critical revisions that are important for the  
6 intellectual content of the protocol. KW is the principal investigator and has made a direct and  
7 substantial contribution to this work by providing the project idea, contributing to the conception  
8 and design of the study and by providing critical revisions that are important for the intellectual  
9 content of the protocol. All authors have approved the final version of the protocol.  
10  
11  
12  
13  
14

## 15 **Acknowledgement**

16  
17 Not applicable  
18  
19

## 20 **Funding**

21 This work was supported by The Swedish Research Council, grant number 521-2013-3503 and the  
22 Strategic Research Area – Care Science, Umeå University, Sweden, no grant number available.  
23  
24  
25  
26  
27  
28

## 29 **References**

- 30  
31  
32 1. World Health Organization. The top 10 causes of death.:  
33 <http://www.who.int/mediacentre/factsheets/fs310/en/>; [accessed 2019-03-19].  
34 2. Jansson SA, Backman H, Stenling A, et al. Health economic costs of COPD in Sweden by disease  
35 severity - Has it changed during a ten years period? *Respir Med* 2013 doi:  
36 10.1016/j.rmed.2013.07.012  
37 3. Jansson SA, Backman H, Ronmark E, et al. Hospitalization Due to Co-Morbid Conditions is the Main  
38 Cost Driver Among Subjects With COPD-A Report From the Population-Based OLIN COPD  
39 Study. *Copd* 2015;12(4):381-9. doi: 10.3109/15412555.2014.974089 [published Online First:  
40 2014/11/22]  
41 4. Vogelmeier CF, Criner GJ, Martinez FJ, et al. Global Strategy for the Diagnosis, Management, and  
42 Prevention of Chronic Obstructive Lung Disease 2017 Report. GOLD Executive Summary. *Am J*  
43 *Respir Crit Care Med* 2017;195(5):557-82. doi: 10.1164/rccm.201701-0218PP [published  
44 Online First: 2017/01/28]  
45 5. Spruit MA, Singh SJ, Garvey C, et al. An official American Thoracic Society/European Respiratory  
46 Society statement: key concepts and advances in pulmonary rehabilitation. *Am J Respir Crit*  
47 *Care Med* 2013;188(8):e13-64. doi: 10.1164/rccm.201309-1634ST [published Online First:  
48 2013/10/17]  
49 6. Effing TW, Bourbeau J, Vercoulen J, et al. Self-management programmes for COPD: moving  
50 forward. *Chronic respiratory disease* 2012;9(1):27-35. doi: 10.1177/1479972311433574  
51 7. Apps LD, Mitchell KE, Harrison SL, et al. The development and pilot testing of the self-management  
52 programme of activity, coping and education for chronic obstructive pulmonary disease  
53 (SPACE for COPD). *International journal of chronic obstructive pulmonary disease* 2013;8:317-  
54 27. doi: 10.2147/COPD.S40414  
55 8. Velloso M, Jardim JR. Study of energy expenditure during activities of daily living using and not  
56 using body position recommended by energy conservation techniques in patients with COPD.  
57 *Chest* 2006;130(1):126-32. doi: 10.1378/chest.130.1.126  
58  
59  
60

- 1
- 2
- 3
- 4 9. Garcia-Aymerich J, Pitta F. Promoting Regular Physical Activity in Pulmonary Rehabilitation. *Clinics*
- 5 *in Chest Medicine* 2014;35(2):363-68. doi: 10.1016/j.ccm.2014.02.011
- 6
- 7 10. Troosters T, Sciurba F, Battaglia S, et al. Physical inactivity in patients with COPD, a controlled
- 8 multi-center pilot-study. *Respir Med* 2010;104(7):1005-11. doi: 10.1016/j.rmed.2010.01.012
- 9 [published Online First: 2010/02/20]
- 10
- 11 11. Waschki B, Kirsten A, Holz O, et al. Physical activity is the strongest predictor of all-cause
- 12 mortality in patients with COPD: a prospective cohort study. *Chest* 2011;140(2):331-42. doi:
- 13 10.1378/chest.10-2521 [published Online First: 2011/01/29]
- 14
- 15 12. Gimeno-Santos E, Frei A, Steurer-Stey C, et al. Determinants and outcomes of physical activity in
- 16 patients with COPD: a systematic review. *Thorax* 2014;69(8):731-9. doi: 10.1136/thoraxjnl-
- 17 2013-204763
- 18
- 19 13. Socialstyrelsen [The National Board of Health and Welfare]. Nationella riktlinjer för vård vid
- 20 astma och KOL 2018. [National guidelines for asthma and COPD care] [accessed March 13,
- 21 2019].
- 22
- 23 14. Wadell K, Janaudis Ferreira T, Arne M, et al. Hospital-based pulmonary rehabilitation in patients
- 24 with COPD in Sweden-A national survey. *Respir Med* 2013;107(8):1195-200. doi:
- 25 10.1016/j.rmed.2013.04.019
- 26
- 27 15. Sundh J, Lindgren H, Hasselgren M, et al. Pulmonary rehabilitation in COPD - available resources
- 28 and utilization in Swedish primary and secondary care. *International journal of chronic*
- 29 *obstructive pulmonary disease* 2017;12:1695-704. doi: 10.2147/copd.s135111 [published
- 30 Online First: 2017/06/28]
- 31
- 32 16. Lundell S, Holmner A, Rehn B, et al. Telehealthcare in COPD: A systematic review and meta-
- 33 analysis on physical outcomes and dyspnea. *Respir Med* 2015;109(1):11-26. doi:
- 34 10.1016/j.rmed.2014.10.008
- 35
- 36 17. Loeckx M, Rabinovich RA, Demeyer H, et al. Smartphone-Based Physical Activity Telecoaching in
- 37 Chronic Obstructive Pulmonary Disease: Mixed-Methods Study on Patient Experiences and
- 38 Lessons for Implementation. *JMIR mHealth and uHealth* 2018;6(12):e200. doi:
- 39 10.2196/mhealth.9774
- 40
- 41 18. Adams SG, Smith PK, Allan PF, et al. Systematic review of the chronic care model in chronic
- 42 obstructive pulmonary disease prevention and management. *Archives of internal medicine*
- 43 2007;167(6):551-61. doi: 10.1001/archinte.167.6.551
- 44
- 45 19. Moy ML, Collins RJ, Martinez CH, et al. An Internet-Mediated Pedometer-Based Program
- 46 Improves Health-Related Quality-of-Life Domains and Daily Step Counts in COPD: A
- 47 Randomized Controlled Trial. *Chest* 2015;148(1):128-37. doi: 10.1378/chest.14-1466
- 48 [published Online First: 2015/03/27]
- 49
- 50 20. Wan ES, Kantorowski A, Homsy D, et al. Promoting physical activity in COPD: Insights from a
- 51 randomized trial of a web-based intervention and pedometer use. *Respir Med* 2017;130:102-
- 52 10. doi: 10.1016/j.rmed.2017.07.057 [published Online First: 2017/12/06]
- 53
- 54 21. McCabe C, McCann M, Brady AM. Computer and mobile technology interventions for
- 55 self-management in chronic obstructive pulmonary disease. *Cochrane Database of*
- 56 *Systematic Reviews* 2017(5) doi: 10.1002/14651858.CD011425.pub2
- 57
- 58 22. Tistad M, Lundell S, Wiklund M, et al. Usefulness and Relevance of an eHealth Tool in Supporting
- 59 the Self-Management of Chronic Obstructive Pulmonary Disease: Explorative Qualitative
- 60 Study of a Cocreative Process. *JMIR Hum Factors* 2018;5(4):e10801. doi: 10.2196/10801
- [published Online First: 2018/10/29]
23. Nyberg A, Wadell K, Lindgren H, et al. Internet-based support for self-management strategies for
- people with COPD-protocol for a controlled pragmatic pilot trial of effectiveness and a
- process evaluation in primary healthcare. *BMJ open* 2017;7(7):e016851. doi:
- 10.1136/bmjopen-2017-016851 [published Online First: 2017/08/03]
24. Nyberg A, Tistad M, Wadell K. Can the COPD web be used to promote self-management in
- patients with COPD in swedish primary care: a controlled pragmatic pilot trial with 3 month-



- and 12 month follow-up. *Scandinavian journal of primary health care* 2019;1-14. doi: 10.1080/02813432.2019.1569415 [published Online First: 2019/02/01]
25. Zwarenstein M, Treweek S, Gagnier JJ, et al. Improving the reporting of pragmatic trials: an extension of the CONSORT statement. *BMJ (Clinical research ed)* 2008;337:a2390. doi: 10.1136/bmj.a2390 [published Online First: 2008/11/13]
26. Chan A-W, Tetzlaff JM, Altman DG, et al. SPIRIT 2013 Statement: Defining Standard Protocol Items for Clinical Trials. *Annals of Internal Medicine* 2013;158(3):200-07. doi: 10.7326/0003-4819-158-3-201302050-00583
27. Chan AW, Tetzlaff JM, Gotzsche PC, et al. SPIRIT 2013 explanation and elaboration: guidance for protocols of clinical trials. *BMJ (Clinical research ed)* 2013;346:e7586. doi: 10.1136/bmj.e7586 [published Online First: 2013/01/11]
28. Eysenbach G. CONSORT-EHEALTH: Improving and Standardizing Evaluation Reports of Web-based and Mobile Health Interventions. *J Med Internet Res* 2011;13(4):e126. doi: 10.2196/jmir.1923 [published Online First: 31.12.2011]
29. Demeyer H, Louvaris Z, Frei A, et al. Physical activity is increased by a 12-week semiautomated telecoaching programme in patients with COPD: a multicentre randomised controlled trial. *Thorax* 2017;72(5):415-23. doi: 10.1136/thoraxjnl-2016-209026
30. Fry JP, Neff RA. Periodic Prompts and Reminders in Health Promotion and Health Behavior Interventions: Systematic Review. *J Med Internet Res* 2009;11(2):e16. doi: 10.2196/jmir.1138 [published Online First: 14.5.2009]
31. Muench F, Baumel A. More Than a Text Message: Dismantling Digital Triggers to Curate Behavior Change in Patient-Centered Health Interventions. *J Med Internet Res* 2017;19(5):e147. doi: 10.2196/jmir.7463 [published Online First: 2017/05/28]
32. Olsson SJG, Ekblom Ö, Andersson E, et al. Categorical answer modes provide superior validity to open answers when asking for level of physical activity: A cross-sectional study. *Scandinavian Journal of Public Health* 2016;44(1):70-76. doi: 10.1177/1403494815602830
33. Socialstyrelsen [The National Board of Health and Welfare]. Nationella riktlinjer för sjukdomsförebyggande metoder 2011 Tobaksbruk, riskbruk av alkohol, otillräcklig fysisk aktivitet och ohälsosamma matvanor Stöd för styrning och ledning [Disease Prevention in the Swedish Healthcare System: Health situation, national guidelines and implementation]. (In Swedish with an English summary). Västerås, Sweden: Socialstyrelsen, 2011. .
34. Demeyer H, Burtin C, Van Remoortel H, et al. Standardizing the analysis of physical activity in patients with COPD following a pulmonary rehabilitation program. *Chest* 2014;146(2):318-27. doi: 10.1378/chest.13-1968 [published Online First: 2014/03/08]
35. Andersson M, Janson C, Emtner M. Accuracy of three activity monitors in patients with chronic obstructive pulmonary disease: a comparison with video recordings. *Copd* 2014;11(5):560-7. doi: 10.3109/15412555.2014.898033 [published Online First: 2014/04/17]
36. Mahler DA, Wells CK. Evaluation of clinical methods for rating dyspnea. *Chest* 1988;93(3):580-6. [published Online First: 1988/03/01]
37. Vernooij RW, Willson M, Gagliardi AR. Characterizing patient-oriented tools that could be packaged with guidelines to promote self-management and guideline adoption: a meta-review. *Implementation science : IS* 2016;11:52. doi: 10.1186/s13012-016-0419-1 [published Online First: 2016/04/16]
38. Jones PW, Harding G, Berry P, et al. Development and first validation of the COPD Assessment Test. *The European respiratory journal* 2009;34(3):648-54. doi: 10.1183/09031936.00102509 [published Online First: 2009/09/02]
39. Dolan P. Modeling valuations for EuroQol health states. *Medical care* 1997;35(11):1095-108. [published Online First: 1997/11/21]
40. Manca A, Hawkins N, Sculpher MJ. Estimating mean QALYs in trial-based cost-effectiveness analysis: the importance of controlling for baseline utility. *Health Economics* 2005;14(5):487-96. doi: 10.1002/hec.944

- 1  
2  
3 41. Puhan MA, Guyatt GH, Goldstein R, et al. Relative responsiveness of the Chronic Respiratory  
4 Questionnaire, St. Georges Respiratory Questionnaire and four other health-related quality  
5 of life instruments for patients with chronic lung disease. *Respiratory Medicine*  
6 2007;101(2):308-16. doi: <https://doi.org/10.1016/j.rmed.2006.04.023>  
7  
8 42. Bestall JC, Paul EA, Garrod R, et al. Usefulness of the Medical Research Council (MRC) dyspnoea  
9 scale as a measure of disability in patients with chronic obstructive pulmonary disease.  
10 *Thorax* 1999;54(7):581-6. [published Online First: 1999/06/22]  
11  
12 43. Rutten-van Molken MP, Oostenbrink JB, Tashkin DP, et al. Does quality of life of COPD patients as  
13 measured by the generic EuroQol five-dimension questionnaire differentiate between COPD  
14 severity stages? *Chest* 2006;130(4):1117-28. doi: 10.1378/chest.130.4.1117 [published  
15 Online First: 2006/10/13]  
16  
17 44. Demeyer H, Burtin C, Hornikx M, et al. The Minimal Important Difference in Physical Activity in  
18 Patients with COPD. *PLOS ONE* 2016;11(4):e0154587. doi: 10.1371/journal.pone.0154587  
19  
20 45. Müllerová H, Shukla A, Hawkins A, et al. Risk factors for acute exacerbations of COPD in a primary  
21 care population: a retrospective observational cohort study. *BMJ open* 2014;4(12):e006171.  
22 doi: 10.1136/bmjopen-2014-006171  
23  
24 46. Graneheim UH, Lundman B. Qualitative content analysis in nursing research: concepts,  
25 procedures and measures to achieve trustworthiness. *Nurse education today*  
26 2004;24(2):105-12. doi: 10.1016/j.nedt.2003.10.001 [published Online First: 2004/02/11]  
27  
28 47. World Medical A. World medical association declaration of helsinki: Ethical principles for medical  
29 research involving human subjects. *JAMA* 2013;310(20):2191-94. doi:  
30 10.1001/jama.2013.281053  
31  
32  
33  
34  
35  
36  
37  
38  
39  
40  
41  
42  
43  
44  
45  
46  
47  
48  
49  
50  
51  
52  
53  
54  
55  
56  
57  
58  
59  
60

Table 1. Participant timeline for enrolment, the intervention and assessments.

| Timepoint                                                              | t <sup>-1</sup> screening/consent | t <sup>0</sup> baseline | t <sup>1</sup> start                                                                | t <sup>2</sup> 3 months | t <sup>3</sup> (interviews) | t <sup>4</sup> 12 months |
|------------------------------------------------------------------------|-----------------------------------|-------------------------|-------------------------------------------------------------------------------------|-------------------------|-----------------------------|--------------------------|
| <b>Enrolment</b>                                                       |                                   |                         |                                                                                     |                         |                             |                          |
| Eligibility screen                                                     | x                                 |                         |                                                                                     |                         |                             |                          |
| Informed consent                                                       |                                   | x                       |                                                                                     |                         |                             |                          |
| Allocation                                                             |                                   |                         | x                                                                                   |                         |                             |                          |
| <b>Intervention</b>                                                    |                                   |                         |                                                                                     |                         |                             |                          |
| The COPD Web                                                           |                                   |                         |  |                         |                             |                          |
| <b>Assessments</b>                                                     |                                   |                         |                                                                                     |                         |                             |                          |
| Sociodemographic (age, sex, anthropometry, diagnosis) <sup>1</sup>     |                                   | x                       |                                                                                     | x                       |                             | x                        |
| Pulmonary function <sup>2</sup>                                        | x                                 |                         |                                                                                     |                         |                             |                          |
| COPD-related symptoms <sup>1</sup>                                     |                                   | x                       |                                                                                     | x                       |                             | x                        |
| Dyspnea <sup>1</sup>                                                   |                                   | x                       |                                                                                     | x                       |                             | x                        |
| Health-related quality of life (HRQoL) <sup>1</sup>                    |                                   | x                       |                                                                                     | x                       |                             | x                        |
| Time spent in physical activity and training <sup>1</sup>              |                                   | x                       |                                                                                     | x                       |                             | x                        |
| Time being sedentary <sup>1</sup>                                      |                                   | x                       |                                                                                     | x                       |                             | x                        |
| Physical activity level (accelerometer) <sup>1</sup>                   |                                   | x                       |                                                                                     | x                       |                             | x                        |
| Implementation <sup>1,3</sup>                                          |                                   |                         | x                                                                                   | x                       | x                           | x                        |
| Response to and interaction with the COPD Web <sup>1</sup>             |                                   |                         |                                                                                     | x                       | x                           | x                        |
| COPD-related health care contacts <sup>1</sup>                         |                                   |                         |                                                                                     | x                       |                             | x                        |
| Enablers and Barriers for the use of a web-based solution <sup>1</sup> |                                   |                         |                                                                                     |                         | x                           |                          |

Data collection from <sup>1</sup> People with COPD, <sup>2</sup> Medical records, <sup>3</sup> Statistics from the website.



Figure 1. A website map of the COPD Web showing the section "I have COPD".

297x209mm (300 x 300 DPI)



Figure 2. Distribution of prompts (SMS and email) to participants in the intervention group

183x57mm (600 x 600 DPI)

# Reporting checklist for protocol of a clinical trial.

Based on the SPIRIT guidelines.

## Instructions to authors

Complete this checklist by entering the page numbers from your manuscript where readers will find each of the items listed below.

Your article may not currently address all the items on the checklist. Please modify your text to include the missing information. If you are certain that an item does not apply, please write "n/a" and provide a short explanation.

Upload your completed checklist as an extra file when you submit to a journal.

In your methods section, say that you used the SPIRIT reporting guidelines, and cite them as:

Chan A-W, Tetzlaff JM, Altman DG, Laupacis A, Gøtzsche PC, Krleža-Jerić K, Hróbjartsson A, Mann H, Dickersin K, Berlin J, Doré C, Parulekar W, Summerskill W, Groves T, Schulz K, Sox H, Rockhold FW, Rennie D, Moher D. SPIRIT 2013 Statement: Defining standard protocol items for clinical trials. *Ann Intern Med.* 2013;158(3):200-207

|                                             |     | Reporting Item                                                                                               | Page Number |
|---------------------------------------------|-----|--------------------------------------------------------------------------------------------------------------|-------------|
| Title                                       | #1  | Descriptive title identifying the study design, population, interventions, and, if applicable, trial acronym | 1           |
| Trial registration                          | #2a | Trial identifier and registry name. If not yet registered, name of intended registry                         | 2+13        |
| Trial registration: data set                | #2b | All items from the World Health Organization Trial Registration Data Set                                     | n/a         |
| Protocol version                            | #3  | Date and version identifier                                                                                  | n/a         |
| Funding                                     | #4  | Sources and types of financial, material, and other support                                                  | 15          |
| Roles and responsibilities: contributorship | #5a | Names, affiliations, and roles of protocol contributors                                                      | 1+15-16     |

|    |                      |     |                                                             |      |
|----|----------------------|-----|-------------------------------------------------------------|------|
| 1  | Roles and            | #5b | Name and contact information for the trial sponsor          | n/a  |
| 2  | responsibilities:    |     |                                                             |      |
| 3  | sponsor contact      |     |                                                             |      |
| 4  | information          |     |                                                             |      |
| 5  |                      |     |                                                             |      |
| 6  |                      |     |                                                             |      |
| 7  | Roles and            | #5c | Role of study sponsor and funders, if any, in study         | 15   |
| 8  | responsibilities:    |     | design; collection, management, analysis, and               |      |
| 9  | sponsor and funder   |     | interpretation of data; writing of the report; and the      |      |
| 10 |                      |     | decision to submit the report for publication, including    |      |
| 11 |                      |     | whether they will have ultimate authority over any of       |      |
| 12 |                      |     | these activities                                            |      |
| 13 |                      |     |                                                             |      |
| 14 |                      |     |                                                             |      |
| 15 |                      |     |                                                             |      |
| 16 |                      |     |                                                             |      |
| 17 | Roles and            | #5d | Composition, roles, and responsibilities of the             | n/a  |
| 18 | responsibilities:    |     | coordinating centre, steering committee, endpoint           |      |
| 19 | committees           |     | adjudication committee, data management team, and           |      |
| 20 |                      |     | other individuals or groups overseeing the trial, if        |      |
| 21 |                      |     | applicable (see Item 21a for data monitoring committee)     |      |
| 22 |                      |     |                                                             |      |
| 23 |                      |     |                                                             |      |
| 24 |                      |     |                                                             |      |
| 25 |                      |     |                                                             |      |
| 26 | Background and       | #6a | Description of research question and justification for      | 4    |
| 27 | rationale            |     | undertaking the trial, including summary of relevant        |      |
| 28 |                      |     | studies (published and unpublished) examining benefits      |      |
| 29 |                      |     | and harms for each intervention                             |      |
| 30 |                      |     |                                                             |      |
| 31 |                      |     |                                                             |      |
| 32 |                      |     |                                                             |      |
| 33 | Background and       | #6b | Explanation for choice of comparators                       | 4    |
| 34 | rationale: choice of |     |                                                             |      |
| 35 | comparators          |     |                                                             |      |
| 36 |                      |     |                                                             |      |
| 37 |                      |     |                                                             |      |
| 38 | Objectives           | #7  | Specific objectives or hypotheses                           | 5    |
| 39 |                      |     |                                                             |      |
| 40 | Trial design         | #8  | Description of trial design including type of trial (eg,    | 5+11 |
| 41 |                      |     | parallel group, crossover, factorial, single group),        |      |
| 42 |                      |     | allocation ratio, and framework (eg, superiority,           |      |
| 43 |                      |     | equivalence, non-inferiority, exploratory)                  |      |
| 44 |                      |     |                                                             |      |
| 45 |                      |     |                                                             |      |
| 46 |                      |     |                                                             |      |
| 47 | Study setting        | #9  | Description of study settings (eg, community clinic,        | 6    |
| 48 |                      |     | academic hospital) and list of countries where data will be |      |
| 49 |                      |     | collected. Reference to where list of study sites can be    |      |
| 50 |                      |     | obtained                                                    |      |
| 51 |                      |     |                                                             |      |
| 52 |                      |     |                                                             |      |
| 53 |                      |     |                                                             |      |
| 54 | Eligibility criteria | #10 | Inclusion and exclusion criteria for participants. If       | 5-6  |
| 55 |                      |     | applicable, eligibility criteria for study centres and      |      |
| 56 |                      |     | individuals who will perform the interventions (eg,         |      |
| 57 |                      |     | surgeons, psychotherapists)                                 |      |
| 58 |                      |     |                                                             |      |
| 59 |                      |     |                                                             |      |
| 60 |                      |     |                                                             |      |

|    |                      |      |                                                              |        |
|----|----------------------|------|--------------------------------------------------------------|--------|
| 1  | Interventions:       | #11a | Interventions for each group with sufficient detail to allow | 7-8    |
| 2  | description          |      | replication, including how and when they will be             |        |
| 3  |                      |      | administered                                                 |        |
| 4  |                      |      |                                                              |        |
| 5  |                      |      |                                                              |        |
| 6  | Interventions:       | #11b | Criteria for discontinuing or modifying allocated            | 13     |
| 7  | modifications        |      | interventions for a given trial participant (eg, drug dose   |        |
| 8  |                      |      | change in response to harms, participant request, or         |        |
| 9  |                      |      | improving / worsening disease)                               |        |
| 10 |                      |      |                                                              |        |
| 11 |                      |      |                                                              |        |
| 12 |                      |      |                                                              |        |
| 13 | Interventions:       | #11c | Strategies to improve adherence to intervention              | 8      |
| 14 | adherence            |      | protocols, and any procedures for monitoring adherence       |        |
| 15 |                      |      | (eg, drug tablet return; laboratory tests)                   |        |
| 16 |                      |      |                                                              |        |
| 17 |                      |      |                                                              |        |
| 18 | Interventions:       | #11d | Relevant concomitant care and interventions that are         | n/a    |
| 19 | concomitant care     |      | permitted or prohibited during the trial                     |        |
| 20 |                      |      |                                                              |        |
| 21 |                      |      |                                                              |        |
| 22 | Outcomes             | #12  | Primary, secondary, and other outcomes, including the        | 8-10   |
| 23 |                      |      | specific measurement variable (eg, systolic blood            |        |
| 24 |                      |      | pressure), analysis metric (eg, change from baseline,        |        |
| 25 |                      |      | final value, time to event), method of aggregation (eg,      |        |
| 26 |                      |      | median, proportion), and time point for each outcome.        |        |
| 27 |                      |      | Explanation of the clinical relevance of chosen efficacy     |        |
| 28 |                      |      | and harm outcomes is strongly recommended                    |        |
| 29 |                      |      |                                                              |        |
| 30 |                      |      |                                                              |        |
| 31 |                      |      |                                                              |        |
| 32 |                      |      |                                                              |        |
| 33 | Participant timeline | #13  | Time schedule of enrolment, interventions (including any     | 6-7+20 |
| 34 |                      |      | run-ins and washouts), assessments, and visits for           |        |
| 35 |                      |      | participants. A schematic diagram is highly recommended      |        |
| 36 |                      |      | (see Figure)                                                 |        |
| 37 |                      |      |                                                              |        |
| 38 |                      |      |                                                              |        |
| 39 |                      |      |                                                              |        |
| 40 | Sample size          | #14  | Estimated number of participants needed to achieve           | 11     |
| 41 |                      |      | study objectives and how it was determined, including        |        |
| 42 |                      |      | clinical and statistical assumptions supporting any sample   |        |
| 43 |                      |      | size calculations                                            |        |
| 44 |                      |      |                                                              |        |
| 45 |                      |      |                                                              |        |
| 46 |                      |      |                                                              |        |
| 47 | Recruitment          | #15  | Strategies for achieving adequate participant enrolment      | 6      |
| 48 |                      |      | to reach target sample size                                  |        |
| 49 |                      |      |                                                              |        |
| 50 |                      |      |                                                              |        |
| 51 | Allocation: sequence | #16a | Method of generating the allocation sequence (eg,            | 11     |
| 52 | generation           |      | computer-generated random numbers), and list of any          |        |
| 53 |                      |      | factors for stratification. To reduce predictability of a    |        |
| 54 |                      |      | random sequence, details of any planned restriction (eg,     |        |
| 55 |                      |      | blocking) should be provided in a separate document that     |        |
| 56 |                      |      |                                                              |        |
| 57 |                      |      |                                                              |        |
| 58 |                      |      |                                                              |        |
| 59 |                      |      |                                                              |        |
| 60 |                      |      |                                                              |        |



is unavailable to those who enrol participants or assign interventions

|    |                       |      |                                                                |       |
|----|-----------------------|------|----------------------------------------------------------------|-------|
| 1  |                       |      |                                                                |       |
| 2  |                       |      |                                                                |       |
| 3  |                       |      |                                                                |       |
| 4  | Allocation            | #16b | Mechanism of implementing the allocation sequence (eg,         | 11    |
| 5  | concealment           |      | central telephone; sequentially numbered, opaque,              |       |
| 6  |                       |      | sealed envelopes), describing any steps to conceal the         |       |
| 7  | mechanism             |      | sequence until interventions are assigned                      |       |
| 8  |                       |      |                                                                |       |
| 9  |                       |      |                                                                |       |
| 10 |                       |      |                                                                |       |
| 11 | Allocation:           | #16c | Who will generate the allocation sequence, who will enrol      | 11    |
| 12 | implementation        |      | participants, and who will assign participants to              |       |
| 13 |                       |      | interventions                                                  |       |
| 14 |                       |      |                                                                |       |
| 15 |                       |      |                                                                |       |
| 16 | Blinding (masking)    | #17a | Who will be blinded after assignment to interventions (eg,     | 12    |
| 17 |                       |      | trial participants, care providers, outcome assessors, data    |       |
| 18 |                       |      | analysts), and how                                             |       |
| 19 |                       |      |                                                                |       |
| 20 |                       |      |                                                                |       |
| 21 | Blinding (masking):   | #17b | If blinded, circumstances under which unblinding is            | n/a   |
| 22 | emergency             |      | permissible, and procedure for revealing a participant's       |       |
| 23 | unblinding            |      | allocated intervention during the trial                        |       |
| 24 |                       |      |                                                                |       |
| 25 |                       |      |                                                                |       |
| 26 |                       |      |                                                                |       |
| 27 | Data collection plan  | #18a | Plans for assessment and collection of outcome,                | 8-11  |
| 28 |                       |      | baseline, and other trial data, including any related          |       |
| 29 |                       |      | processes to promote data quality (eg, duplicate               |       |
| 30 |                       |      | measurements, training of assessors) and a description         |       |
| 31 |                       |      | of study instruments (eg, questionnaires, laboratory tests)    |       |
| 32 |                       |      | along with their reliability and validity, if known. Reference |       |
| 33 |                       |      | to where data collection forms can be found, if not in the     |       |
| 34 |                       |      | protocol                                                       |       |
| 35 |                       |      |                                                                |       |
| 36 |                       |      |                                                                |       |
| 37 |                       |      |                                                                |       |
| 38 |                       |      |                                                                |       |
| 39 | Data collection plan: | #18b | Plans to promote participant retention and complete            | 7     |
| 40 | retention             |      | follow-up, including list of any outcome data to be            |       |
| 41 |                       |      | collected for participants who discontinue or deviate from     |       |
| 42 |                       |      | intervention protocols                                         |       |
| 43 |                       |      |                                                                |       |
| 44 |                       |      |                                                                |       |
| 45 |                       |      |                                                                |       |
| 46 | Data management       | #19  | Plans for data entry, coding, security, and storage,           | 12    |
| 47 |                       |      | including any related processes to promote data quality        |       |
| 48 |                       |      | (eg, double data entry; range checks for data values).         |       |
| 49 |                       |      | Reference to where details of data management                  |       |
| 50 |                       |      | procedures can be found, if not in the protocol                |       |
| 51 |                       |      |                                                                |       |
| 52 |                       |      |                                                                |       |
| 53 |                       |      |                                                                |       |
| 54 | Statistics: outcomes  | #20a | Statistical methods for analysing primary and secondary        | 12-13 |
| 55 |                       |      | outcomes. Reference to where other details of the              |       |
| 56 |                       |      | statistical analysis plan can be found, if not in the protocol |       |
| 57 |                       |      |                                                                |       |
| 58 |                       |      |                                                                |       |
| 59 |                       |      |                                                                |       |
| 60 |                       |      |                                                                |       |

|    |                        |      |                                                              |         |
|----|------------------------|------|--------------------------------------------------------------|---------|
| 1  | Statistics: additional | #20b | Methods for any additional analyses (eg, subgroup and        | 12      |
| 2  | analyses               |      | adjusted analyses)                                           |         |
| 3  |                        |      |                                                              |         |
| 4  | Statistics: analysis   | #20c | Definition of analysis population relating to protocol non-  | 12      |
| 5  | population and         |      | adherence (eg, as randomised analysis), and any              |         |
| 6  | missing data           |      | statistical methods to handle missing data (eg, multiple     |         |
| 7  |                        |      | imputation)                                                  |         |
| 8  |                        |      |                                                              |         |
| 9  |                        |      |                                                              |         |
| 10 |                        |      |                                                              |         |
| 11 | Data monitoring:       | #21a | Composition of data monitoring committee (DMC);              | n/a     |
| 12 | formal committee       |      | summary of its role and reporting structure; statement of    |         |
| 13 |                        |      | whether it is independent from the sponsor and               |         |
| 14 |                        |      | competing interests; and reference to where further          |         |
| 15 |                        |      | details about its charter can be found, if not in the        |         |
| 16 |                        |      | protocol. Alternatively, an explanation of why a DMC is      |         |
| 17 |                        |      | not needed                                                   |         |
| 18 |                        |      |                                                              |         |
| 19 | Data monitoring:       | #21b | Description of any interim analyses and stopping             | 12      |
| 20 | interim analysis       |      | guidelines, including who will have access to these          |         |
| 21 |                        |      | interim results and make the final decision to terminate     |         |
| 22 |                        |      | the trial                                                    |         |
| 23 |                        |      |                                                              |         |
| 24 |                        |      |                                                              |         |
| 25 |                        |      |                                                              |         |
| 26 |                        |      |                                                              |         |
| 27 |                        |      |                                                              |         |
| 28 |                        |      |                                                              |         |
| 29 | Harms                  | #22  | Plans for collecting, assessing, reporting, and managing     | 9       |
| 30 |                        |      | solicited and spontaneously reported adverse events and      |         |
| 31 |                        |      | other unintended effects of trial interventions or trial     |         |
| 32 |                        |      | conduct                                                      |         |
| 33 |                        |      |                                                              |         |
| 34 |                        |      |                                                              |         |
| 35 |                        |      |                                                              |         |
| 36 | Auditing               | #23  | Frequency and procedures for auditing trial conduct, if      | n/a     |
| 37 |                        |      | any, and whether the process will be independent from        |         |
| 38 |                        |      | investigators and the sponsor                                |         |
| 39 |                        |      |                                                              |         |
| 40 |                        |      |                                                              |         |
| 41 |                        |      |                                                              |         |
| 42 | Research ethics        | #24  | Plans for seeking research ethics committee / institutional  | 2+13+15 |
| 43 | approval               |      | review board (REC / IRB) approval                            |         |
| 44 |                        |      |                                                              |         |
| 45 | Protocol               | #25  | Plans for communicating important protocol modifications     | 13      |
| 46 | amendments             |      | (eg, changes to eligibility criteria, outcomes, analyses) to |         |
| 47 |                        |      | relevant parties (eg, investigators, REC / IRBs, trial       |         |
| 48 |                        |      | participants, trial registries, journals, regulators)        |         |
| 49 |                        |      |                                                              |         |
| 50 |                        |      |                                                              |         |
| 51 |                        |      |                                                              |         |
| 52 | Consent or assent      | #26a | Who will obtain informed consent or assent from potential    | 6+12-13 |
| 53 |                        |      | trial participants or authorised surrogates, and how (see    |         |
| 54 |                        |      | Item 32)                                                     |         |
| 55 |                        |      |                                                              |         |
| 56 |                        |      |                                                              |         |
| 57 |                        |      |                                                              |         |
| 58 |                        |      |                                                              |         |
| 59 |                        |      |                                                              |         |
| 60 |                        |      |                                                              |         |

|    |                       |      |                                                                |     |
|----|-----------------------|------|----------------------------------------------------------------|-----|
| 1  | Consent or assent:    | #26b | Additional consent provisions for collection and use of        | n/a |
| 2  | ancillary studies     |      | participant data and biological specimens in ancillary         |     |
| 3  |                       |      | studies, if applicable                                         |     |
| 4  |                       |      |                                                                |     |
| 5  |                       |      |                                                                |     |
| 6  | Confidentiality       | #27  | How personal information about potential and enrolled          | 12  |
| 7  |                       |      | participants will be collected, shared, and maintained in      |     |
| 8  |                       |      | order to protect confidentiality before, during, and after     |     |
| 9  |                       |      | the trial                                                      |     |
| 10 |                       |      |                                                                |     |
| 11 |                       |      |                                                                |     |
| 12 |                       |      |                                                                |     |
| 13 | Declaration of        | #28  | Financial and other competing interests for principal          | 14  |
| 14 | interests             |      | investigators for the overall trial and each study site        |     |
| 15 |                       |      |                                                                |     |
| 16 |                       |      |                                                                |     |
| 17 | Data access           | #29  | Statement of who will have access to the final trial           | 12  |
| 18 |                       |      | dataset, and disclosure of contractual agreements that         |     |
| 19 |                       |      | limit such access for investigators                            |     |
| 20 |                       |      |                                                                |     |
| 21 |                       |      |                                                                |     |
| 22 | Ancillary and post    | #30  | Provisions, if any, for ancillary and post-trial care, and for | n/a |
| 23 | trial care            |      | compensation to those who suffer harm from trial               |     |
| 24 |                       |      | participation                                                  |     |
| 25 |                       |      |                                                                |     |
| 26 |                       |      |                                                                |     |
| 27 | Dissemination         | #31a | Plans for investigators and sponsor to communicate trial       | 13  |
| 28 | policy: trial results |      | results to participants, healthcare professionals, the         |     |
| 29 |                       |      | public, and other relevant groups (eg, via publication,        |     |
| 30 |                       |      | reporting in results databases, or other data sharing          |     |
| 31 |                       |      | arrangements), including any publication restrictions          |     |
| 32 |                       |      |                                                                |     |
| 33 |                       |      |                                                                |     |
| 34 |                       |      |                                                                |     |
| 35 |                       |      |                                                                |     |
| 36 | Dissemination         | #31b | Authorship eligibility guidelines and any intended use of      | n/a |
| 37 | policy: authorship    |      | professional writers                                           |     |
| 38 |                       |      |                                                                |     |
| 39 |                       |      |                                                                |     |
| 40 | Dissemination         | #31c | Plans, if any, for granting public access to the full          | n/a |
| 41 | policy: reproducible  |      | protocol, participant-level dataset, and statistical code      |     |
| 42 | research              |      |                                                                |     |
| 43 |                       |      |                                                                |     |
| 44 |                       |      |                                                                |     |
| 45 | Informed consent      | #32  | Model consent form and other related documentation             | n/a |
| 46 | materials             |      | given to participants and authorised surrogates                |     |
| 47 |                       |      |                                                                |     |
| 48 |                       |      |                                                                |     |
| 49 | Biological            | #33  | Plans for collection, laboratory evaluation, and storage of    | n/a |
| 50 | specimens             |      | biological specimens for genetic or molecular analysis in      |     |
| 51 |                       |      | the current trial and for future use in ancillary studies, if  |     |
| 52 |                       |      | applicable                                                     |     |
| 53 |                       |      |                                                                |     |
| 54 |                       |      |                                                                |     |
| 55 |                       |      |                                                                |     |

The SPIRIT checklist is distributed under the terms of the Creative Commons Attribution License CC-BY-ND 3.0. This checklist was completed on 29. March 2019 using <https://www.goodreports.org/>, a tool made by the [EQUATOR Network](#) in collaboration with [Penelope.ai](#)
